# Supplementary material for: Germline-Encoded TCR-MHC Contacts Promote TCR V Gene Bias in Umbilical Cord Blood T Cell Repertoire
Source: Front Immunol. 2019 Aug 30;10:2064. doi: 10.3389/fimmu.2019.02064 (PMC6730489; doi:10.3389/fimmu.2019.02064)
Supplement: Supplementary file 9 [file Table_9.XLSX]

## Sheet: Supplementary Table 9
Supplementary Table 9. Results of QTL analysis between MHC amino acids and IGHV gene usage.
IGHV gene	Amino_Acid_Variation_in_MHC_locus	beta	t-stat	p-value	FDR	Significant at 5% FDR
IGHV4.30.2	HLA-C.R97W_T	0.0678461	4.34119	2.25437e-05	0.52802	FALSE
IGHV2.70	HLA-C.A152E_A	0.082525	3.9325	0.000116039	0.636006	FALSE
IGHV2.70	HLA-C.R97W_T	-0.0797203	-3.85936	0.000153584	0.636006	FALSE
IGHV3.NL1	HLA-DPB1.F35L_A	-0.552287	-3.81339	0.000182796	0.636006	FALSE
IGHV2.70	HLA-C.A152T_T	0.112018	3.76723	0.000217379	0.636006	FALSE
IGHV2.70	HLA-C.E275G_T	0.112018	3.76723	0.000217379	0.636006	FALSE
IGHV2.70	HLA-C.R35Q_T	0.112018	3.76723	0.000217379	0.636006	FALSE
IGHV2.70	HLA-C.R35R_A	0.112018	3.76723	0.000217379	0.636006	FALSE
IGHV3.30.3	HLA-DPB1.F35L_A	-0.56695	-3.71739	0.000261619	0.636006	FALSE
IGHV2.70	HLA-C.E177K_T	0.109736	3.70731	0.000271542	0.636006	FALSE
IGHV2.70	HLA-C.R219W_A	0.0721506	3.64076	0.000346562	0.737925	FALSE
IGHV3.NL1	HLA-DPB1.A55E_A	-0.511817	-3.49398	0.000586446	0.999059	FALSE
IGHV4.b	HLA-C.R97W_T	0.0205943	3.48693	0.000601206	0.999059	FALSE
IGHV3.30.3	HLA-DPB1.A55E_A	-0.524886	-3.40339	0.000804693	0.999059	FALSE
IGHV3.NL1	HLA-DPB1.F35F_T	-0.529904	-3.39034	0.000841773	0.999059	FALSE
IGHV3.30.3	HLA-DPB1.F35F_T	-0.554913	-3.37643	0.00088306	0.999059	FALSE
IGHV4.30.2	HLA-C.A152E_A	-0.0545954	-3.37471	0.000888283	0.999059	FALSE
IGHV2.70	HLA-C.L156R_T	-0.0701106	-3.36858	0.00090718	0.999059	FALSE
IGHV3.21	HLA-A.D74H_T	-0.494899	-3.36087	0.000931451	0.999059	FALSE
IGHV3.21	HLA-A.G107W_T	-0.494899	-3.36087	0.000931451	0.999059	FALSE
IGHV3.21	HLA-A.Q62G_T	-0.494899	-3.36087	0.000931451	0.999059	FALSE
IGHV4.30.2	HLA-B.R156W_T	0.0617696	3.35579	0.000947788	0.999059	FALSE
IGHV2.70	HLA-C.E275E_A	0.0845633	3.32445	0.00105465	0.999059	FALSE
IGHV1.18	HLA-DRB1.I67F_T	0.163332	3.2579	0.00131975	0.999059	FALSE
IGHV2.70	HLA-B.T94I_T	0.0761219	3.25227	0.0013448	0.999059	FALSE
IGHV2.70	HLA-B.T94T_A	0.0761219	3.25227	0.0013448	0.999059	FALSE
IGHV4.30.2	HLA-C.L156R_T	0.051603	3.2406	0.00139816	0.999059	FALSE
IGHV2.70	HLA-C.D114N_T	0.0821262	3.23084	0.00144431	0.999059	FALSE
IGHV3.23	HLA-C.R219W_A	0.67914	3.21709	0.0015117	0.999059	FALSE
IGHV2.70	HLA-B.H113Y_T	0.101079	3.21014	0.00154689	0.999059	FALSE
IGHV3.7	HLA-A.T73I_T	0.506892	3.20593	0.00156855	0.999059	FALSE
IGHV1.69	HLA-B.L95I_T	0.213947	3.19242	0.00164	0.999059	FALSE
IGHV4.30.2	HLA-C.A11A_A	0.0521433	3.17823	0.00171829	0.999059	FALSE
IGHV4.30.2	HLA-C.A11S_T	0.0521433	3.17823	0.00171829	0.999059	FALSE
IGHV4.30.2	HLA-C.L156L_A	0.0473656	3.17705	0.00172493	0.999059	FALSE
IGHV3.7	HLA-A.I97M_T	0.312083	3.17704	0.00172498	0.999059	FALSE
IGHV2.70	HLA-B.L95I_T	0.0734658	3.17356	0.00174478	0.999059	FALSE
IGHV4.61	HLA-C.R97W_T	0.054679	3.17336	0.00174591	0.999059	FALSE
IGHV1.69	HLA-B.T94I_T	0.212227	3.1251	0.00204321	0.999059	FALSE
IGHV1.69	HLA-B.T94T_A	0.212227	3.1251	0.00204321	0.999059	FALSE
IGHV3.43	HLA-C.R21H_T	-0.377752	-3.12127	0.00206866	0.999059	FALSE
IGHV3.21	HLA-A.I142T_T	-0.459689	-3.1065	0.00216974	0.999059	FALSE
IGHV3.21	HLA-A.R145H_T	-0.459689	-3.1065	0.00216974	0.999059	FALSE
IGHV2.26	HLA-B.E45E_T	0.0304641	3.09073	0.00228265	0.999059	FALSE
IGHV7.4.1	HLA-B.S11A_A	-0.126866	-3.08322	0.00233832	0.999059	FALSE
IGHV7.4.1	HLA-B.V12M_A	-0.126866	-3.08322	0.00233832	0.999059	FALSE
IGHV3.15	HLA-DQA1.M76L_T	0.0163683	3.07996	0.00236287	0.999059	FALSE
IGHV1.18	HLA-A.L156W_T	-0.244973	-3.07033	0.0024368	0.999059	FALSE
IGHV3.66	HLA-C.R97W_T	0.149548	3.05291	0.002576	0.999059	FALSE
IGHV4.30.2	HLA-DQB1.L-4L_T	-0.0812736	-3.02272	0.00283462	0.999059	FALSE
IGHV3.49	HLA-B.S97S_T	0.0158606	3.01606	0.00289481	0.999059	FALSE
IGHV2.70	HLA-C.S116Y_T	-0.0577531	-3.00532	0.00299434	0.999059	FALSE
IGHV1.18	HLA-DRB1.D57V_T	0.147231	3.00198	0.00302599	0.999059	FALSE
IGHV1.18	HLA-DRB1.Y60S_T	0.147231	3.00198	0.00302599	0.999059	FALSE
IGHV1.18	HLA-DRB1.D28D_A	0.143068	3.00167	0.0030289	0.999059	FALSE
IGHV1.18	HLA-DRB1.Y30Y_A	0.143068	3.00167	0.0030289	0.999059	FALSE
IGHV4.30.2	HLA-C.R219W_A	-0.0457981	-2.99599	0.00308342	0.999059	FALSE
IGHV3.7	HLA-B.L-7V_T	0.280789	2.98732	0.0031683	0.999059	FALSE
IGHV3.21	HLA-B.A305T_A	0.402224	2.98372	0.00320418	0.999059	FALSE
IGHV2.70	HLA-C.A11A_A	-0.0638533	-2.96227	0.00342574	0.999059	FALSE
IGHV2.70	HLA-C.A11S_T	-0.0638533	-2.96227	0.00342574	0.999059	FALSE
IGHV2.70	HLA-C.L156L_A	-0.0577409	-2.94724	0.0035893	0.999059	FALSE
IGHV3.21	HLA-A.I95V_T	-0.434033	-2.93627	0.00371318	0.999059	FALSE
IGHV3.21	HLA-A.I97M_T	0.421889	2.93204	0.00376193	0.999059	FALSE
IGHV4.61	HLA-C.A152E_A	-0.0515708	-2.93174	0.00376544	0.999059	FALSE
IGHV3.7	HLA-A.E63N_T	0.42812	2.93152	0.00376802	0.999059	FALSE
IGHV3.7	HLA-A.Q62R_T	0.42812	2.93152	0.00376802	0.999059	FALSE
IGHV2.26	HLA-B.E163T_T	0.0292131	2.93008	0.00378471	0.999059	FALSE
IGHV4.4	HLA-B.S11A_A	0.115144	2.92899	0.00379751	0.999059	FALSE
IGHV4.4	HLA-B.V12M_A	0.115144	2.92899	0.00379751	0.999059	FALSE
IGHV3.20	HLA-DQB1.S-5T_A	-0.113168	-2.92863	0.00380173	0.999059	FALSE
IGHV4.b	HLA-B.A69R_T	0.0239849	2.92226	0.003877	0.999059	FALSE
IGHV4.b	HLA-B.E76V_T	0.0239849	2.92226	0.003877	0.999059	FALSE
IGHV4.b	HLA-B.I66K_T	0.0239849	2.92226	0.003877	0.999059	FALSE
IGHV3.21	HLA-A.Y99C_T	-0.677142	-2.91691	0.00394134	0.999059	FALSE
IGHV3.d	HLA-DRB1.I67I_T	0.0150756	2.90395	0.00410108	0.999059	FALSE
IGHV4.30.2	HLA-DQB1.E74E_A	0.0474633	2.89029	0.00427598	0.999059	FALSE
IGHV4.30.2	HLA-DQB1.L75V_T	0.0474633	2.89029	0.00427598	0.999059	FALSE
IGHV4.30.2	HLA-DQB1.T71T_A	0.0474633	2.89029	0.00427598	0.999059	FALSE
IGHV3.15	HLA-DRB1.Q70D_T	0.0142035	2.87285	0.00450919	0.999059	FALSE
IGHV4.30.2	HLA-B.R156L_A	0.0488914	2.86203	0.0046595	0.999059	FALSE
IGHV4.30.2	HLA-B.A69R_T	0.0630564	2.85579	0.00474845	0.999059	FALSE
IGHV4.30.2	HLA-B.E76V_T	0.0630564	2.85579	0.00474845	0.999059	FALSE
IGHV4.30.2	HLA-B.I66K_T	0.0630564	2.85579	0.00474845	0.999059	FALSE
IGHV3.21	HLA-A.I97R_T	-0.417913	-2.85571	0.00474955	0.999059	FALSE
IGHV4.30.2	HLA-DQB1.T77R_T	0.0488546	2.8342	0.00506779	0.999059	FALSE
IGHV4.30.2	HLA-DQB1.T77T_A	0.0488546	2.8342	0.00506779	0.999059	FALSE
IGHV4.30.2	HLA-DQB1.A-26S_T	0.0516966	2.8305	0.00512432	0.999059	FALSE
IGHV4.30.2	HLA-DQB1.G125S_T	0.0516966	2.8305	0.00512432	0.999059	FALSE
IGHV4.30.2	HLA-DQB1.L-4S_T	0.0516966	2.8305	0.00512432	0.999059	FALSE
IGHV4.30.2	HLA-DQB1.M-8I_T	0.0516966	2.8305	0.00512432	0.999059	FALSE
IGHV4.30.2	HLA-DQB1.M14L_T	0.0516966	2.8305	0.00512432	0.999059	FALSE
IGHV4.30.2	HLA-DQB1.Q224R_T	0.0516966	2.8305	0.00512432	0.999059	FALSE
IGHV4.30.2	HLA-DQB1.T71A_T	0.0516966	2.8305	0.00512432	0.999059	FALSE
IGHV4.30.2	HLA-DQB1.V116I_T	0.0516966	2.8305	0.00512432	0.999059	FALSE
IGHV3.21	HLA-B.V282I_A	0.378537	2.82685	0.00518082	0.999059	FALSE
IGHV1.45	HLA-B.I66N_T	0.0815139	2.82151	0.00526452	0.999059	FALSE
IGHV1.45	HLA-B.Q65R_T	0.0815139	2.82151	0.00526452	0.999059	FALSE
IGHV1.45	HLA-B.Q70S_T	0.0815139	2.82151	0.00526452	0.999059	FALSE
IGHV1.45	HLA-B.R62G_T	0.0815139	2.82151	0.00526452	0.999059	FALSE
IGHV1.45	HLA-B.Y67M_T	0.0815139	2.82151	0.00526452	0.999059	FALSE
IGHV3.7	HLA-A.F9T_T	0.419336	2.81967	0.00529357	0.999059	FALSE
IGHV3.21	HLA-A.R114Q_T	0.567484	2.81208	0.00541511	0.999059	FALSE
IGHV3.23	HLA-C.A152E_A	0.635264	2.81051	0.00544057	0.999059	FALSE
IGHV4.30.2	HLA-DQB1.Y30H_T	0.0503817	2.80204	0.00557971	0.999059	FALSE
IGHV4.30.2	HLA-DQB1.Y30Y_A	0.04748	2.80112	0.00559506	0.999059	FALSE
IGHV3.13	HLA-A.E152A_T	-0.140692	-2.7864	0.00584545	0.999059	FALSE
IGHV4.31	HLA-C.D9S_T	-0.00246232	-2.78216	0.00591941	0.999059	FALSE
IGHV3.72	HLA-DPB1.M76V_T	0.00535552	2.78125	0.00593535	0.999059	FALSE
IGHV4.30.2	HLA-DQB1.E74S_T	0.0464085	2.77593	0.00602969	0.999059	FALSE
IGHV4.30.2	HLA-DQB1.L26G_T	0.0464085	2.77593	0.00602969	0.999059	FALSE
IGHV3.7	HLA-A.R114Q_T	0.383511	2.7723	0.00609474	0.999059	FALSE
IGHV3.13	HLA-A.S105P_T	-0.134482	-2.77145	0.00611011	0.999059	FALSE
IGHV5.51	HLA-B.E163E_T	0.102416	2.77093	0.00611945	0.999059	FALSE
IGHV3.7	HLA-B.S11A_A	0.33561	2.76895	0.00615536	0.999059	FALSE
IGHV3.7	HLA-B.V12M_A	0.33561	2.76895	0.00615536	0.999059	FALSE
IGHV1.18	HLA-DQB1.F9Y_A	-0.165083	-2.75607	0.00639355	0.999059	FALSE
IGHV1.69	HLA-B.H113Y_T	0.2529	2.75554	0.0064036	0.999059	FALSE
IGHV4.b	HLA-DQB1.G125G_T	-0.0193527	-2.75112	0.00648732	0.999059	FALSE
IGHV5.51	HLA-B.S24T_T	0.101372	2.74464	0.00661193	0.999059	FALSE
IGHV1.18	HLA-DQB1.R55P_T	0.13948	2.74042	0.00669431	0.999059	FALSE
IGHV3.72	HLA-A.F9S_T	0.00367401	2.73962	0.00671003	0.999059	FALSE
IGHV3.13	HLA-A.A90D_T	-0.133285	-2.73529	0.00679568	0.999059	FALSE
IGHV3.13	HLA-A.T163R_T	-0.133285	-2.73529	0.00679568	0.999059	FALSE
IGHV1.69	HLA-C.V304M_T	0.186079	2.72939	0.00691391	0.999059	FALSE
IGHV1.69	HLA-C.V304V_A	0.186079	2.72939	0.00691391	0.999059	FALSE
IGHV3.43	HLA-DQB1.A-9S_T	0.556307	2.72699	0.00696253	0.999059	FALSE
IGHV3.43	HLA-DQB1.E74A_T	0.556307	2.72699	0.00696253	0.999059	FALSE
IGHV3.43	HLA-DQB1.P52L_T	0.556307	2.72699	0.00696253	0.999059	FALSE
IGHV3.43	HLA-DQB1.R55L_T	0.556307	2.72699	0.00696253	0.999059	FALSE
IGHV3.43	HLA-DQB1.T71K_T	0.556307	2.72699	0.00696253	0.999059	FALSE
IGHV3.43	HLA-DQB1.T28S_T	0.556307	2.72699	0.00696253	0.999059	FALSE
IGHV3.43	HLA-DQB1.V46E_T	0.556307	2.72699	0.00696253	0.999059	FALSE
IGHV3.43	HLA-DQB1.Y30S_T	0.556307	2.72699	0.00696253	0.999059	FALSE
IGHV3.43	HLA-DQB1.Y37I_T	0.556307	2.72699	0.00696253	0.999059	FALSE
IGHV3.43	HLA-DQB1.Y47F_T	0.556307	2.72699	0.00696253	0.999059	FALSE
IGHV3.43	HLA-DQB1.Y47Y_A	0.556307	2.72699	0.00696253	0.999059	FALSE
IGHV3.21	HLA-DQA1.D2G_T	-0.586525	-2.71784	0.00715073	0.999059	FALSE
IGHV3.21	HLA-DQA1.V-6M_T	-0.586525	-2.71784	0.00715073	0.999059	FALSE
IGHV3.7	HLA-A.I298F_T	0.398112	2.71109	0.00729256	0.999059	FALSE
IGHV3.7	HLA-A.M307R_T	0.398112	2.71109	0.00729256	0.999059	FALSE
IGHV3.7	HLA-A.S-10L_T	0.398112	2.71109	0.00729256	0.999059	FALSE
IGHV3.48	HLA-DPB1.F35F_T	0.388684	2.70642	0.00739207	0.999059	FALSE
IGHV3.21	HLA-B.S24A_A	0.365631	2.70285	0.00746898	0.999059	FALSE
IGHV3.15	HLA-DQB1.V-17A_T	0.0123771	2.69655	0.00760656	0.999059	FALSE
IGHV2.70	HLA-C.D9F_T	-0.0635307	-2.68818	0.00779289	0.999059	FALSE
IGHV2.70	HLA-C.R6K_T	-0.0635307	-2.68818	0.00779289	0.999059	FALSE
IGHV2.70	HLA-C.S99C_T	-0.0635307	-2.68818	0.00779289	0.999059	FALSE
IGHV2.70	HLA-C.V248M_T	-0.0635307	-2.68818	0.00779289	0.999059	FALSE
IGHV1.58	HLA-DPB1.K69E_T	0.0252496	2.68762	0.00780557	0.999059	FALSE
IGHV3.d	HLA-A.R114Q_T	0.0198022	2.67505	0.00809355	0.999059	FALSE
IGHV4.30.2	HLA-DQB1.G125G_T	-0.0506112	-2.6742	0.00811333	0.999059	FALSE
IGHV3.23	HLA-B.S11A_A	0.732025	2.66814	0.00825591	0.999059	FALSE
IGHV3.23	HLA-B.V12M_A	0.732025	2.66814	0.00825591	0.999059	FALSE
IGHV4.b	HLA-DRB1.A74L_T	-0.0279607	-2.6667	0.00829006	0.999059	FALSE
IGHV4.b	HLA-DRB1.R189S_T	-0.0279607	-2.6667	0.00829006	0.999059	FALSE
IGHV2.70	HLA-C.S116F_T	0.0666398	2.66604	0.00830596	0.999059	FALSE
IGHV3.7	HLA-B.E152V_A	-0.235901	-2.65732	0.00851613	0.999059	FALSE
IGHV1.69	HLA-C.A11A_A	-0.165878	-2.64603	0.0087953	0.999059	FALSE
IGHV1.69	HLA-C.A11S_T	-0.165878	-2.64603	0.0087953	0.999059	FALSE
IGHV1.69	HLA-C.D9F_T	-0.180304	-2.63267	0.00913659	0.999059	FALSE
IGHV1.69	HLA-C.R6K_T	-0.180304	-2.63267	0.00913659	0.999059	FALSE
IGHV1.69	HLA-C.S99C_T	-0.180304	-2.63267	0.00913659	0.999059	FALSE
IGHV1.69	HLA-C.V248M_T	-0.180304	-2.63267	0.00913659	0.999059	FALSE
IGHV1.18	HLA-A.A149T_T	-0.217972	-2.62993	0.00920809	0.999059	FALSE
IGHV3.7	HLA-A.E63E_A	0.36532	2.6222	0.0094121	0.999059	FALSE
IGHV4.b	HLA-B.R156L_A	0.0167179	2.62193	0.00941942	0.999059	FALSE
IGHV3.15	HLA-DRB1.I67F_T	0.0131105	2.62113	0.00944075	0.999059	FALSE
IGHV7.4.1	HLA-DRB1.A73G_T	-0.137154	-2.62112	0.00944098	0.999059	FALSE
IGHV5.51	HLA-A.L156W_T	-0.157358	-2.61508	0.00960395	0.999059	FALSE
IGHV3.20	HLA-DRB1.D57V_T	0.0982342	2.61186	0.00969157	0.999059	FALSE
IGHV3.20	HLA-DRB1.Y60S_T	0.0982342	2.61186	0.00969157	0.999059	FALSE
IGHV4.39	HLA-DPB1.F35F_T	0.269843	2.60999	0.00974313	0.999059	FALSE
IGHV1.f	HLA-DPB1.M76V_T	0.0141051	2.60816	0.00979347	0.999059	FALSE
IGHV4.61	HLA-DPA1.A11M_A	0.0436922	2.60131	0.00998451	0.999059	FALSE
IGHV5.51	HLA-B.A41T_T	0.0947283	2.59423	0.0101854	0.999059	FALSE
IGHV3.21	HLA-A.F9F_T	-0.377611	-2.59409	0.0101894	0.999059	FALSE
IGHV3.49	HLA-B.I66N_T	0.0145749	2.58546	0.0104395	0.999059	FALSE
IGHV3.49	HLA-B.Q65R_T	0.0145749	2.58546	0.0104395	0.999059	FALSE
IGHV3.49	HLA-B.Q70S_T	0.0145749	2.58546	0.0104395	0.999059	FALSE
IGHV3.49	HLA-B.R62G_T	0.0145749	2.58546	0.0104395	0.999059	FALSE
IGHV3.49	HLA-B.Y67M_T	0.0145749	2.58546	0.0104395	0.999059	FALSE
IGHV4.59	HLA-DRB1.I67F_T	0.0890405	2.58467	0.0104627	0.999059	FALSE
IGHV2.26	HLA-B.Y67S_A	0.0203124	2.58311	0.0105084	0.999059	FALSE
IGHV4.30.2	HLA-B.Y67Y_T	0.0441532	2.57621	0.0107135	0.999059	FALSE
IGHV3.15	HLA-C.V304M_T	0.0144035	2.57093	0.0108728	0.999059	FALSE
IGHV3.15	HLA-C.V304V_A	0.0144035	2.57093	0.0108728	0.999059	FALSE
IGHV5.51	HLA-DQA1.Y25F_T	0.116352	2.57077	0.0108775	0.999059	FALSE
IGHV3.20	HLA-DQB1.E74S_T	-0.103296	-2.56796	0.0109633	0.999059	FALSE
IGHV3.20	HLA-DQB1.L26G_T	-0.103296	-2.56796	0.0109633	0.999059	FALSE
IGHV2.70	HLA-C.V304M_T	0.0602543	2.55358	0.0114109	0.999059	FALSE
IGHV2.70	HLA-C.V304V_A	0.0602543	2.55358	0.0114109	0.999059	FALSE
IGHV5.51	HLA-B.N63E_A	-0.0959547	-2.55358	0.0114112	0.999059	FALSE
IGHV4.30.2	HLA-B.Q70Q_T	0.0443815	2.55269	0.0114391	0.999059	FALSE
IGHV1.69	HLA-C.R97W_T	-0.155776	-2.55269	0.0114394	0.999059	FALSE
IGHV4.30.4	HLA-C.E275K_T	0.00758956	2.54915	0.0115523	0.999059	FALSE
IGHV4.61	HLA-DPB1.A55D_T	0.0464891	2.54041	0.0118356	0.999059	FALSE
IGHV4.61	HLA-DPB1.A56E_T	0.0464891	2.54041	0.0118356	0.999059	FALSE
IGHV1.69	HLA-C.D9Y_T	0.145858	2.53793	0.0119169	0.999059	FALSE
IGHV3.21	HLA-C.L156R_T	-0.364624	-2.5346	0.0120271	0.999059	FALSE
IGHV3.21	HLA-B.S11A_A	0.449505	2.53324	0.0120724	0.999059	FALSE
IGHV3.21	HLA-B.V12M_A	0.449505	2.53324	0.0120724	0.999059	FALSE
IGHV3.15	HLA-DQB1.G45E_T	0.0157565	2.52627	0.0123067	0.999059	FALSE
IGHV1.45	HLA-DQB1.F87F_T	0.0465242	2.52556	0.0123309	0.999059	FALSE
IGHV3.64	HLA-B.S97R_A	0.183588	2.52336	0.0124058	0.999059	FALSE
IGHV1.69	HLA-C.A152T_T	0.221319	2.52264	0.0124305	0.999059	FALSE
IGHV1.69	HLA-C.E275G_T	0.221319	2.52264	0.0124305	0.999059	FALSE
IGHV1.69	HLA-C.R35Q_T	0.221319	2.52264	0.0124305	0.999059	FALSE
IGHV1.69	HLA-C.R35R_A	0.221319	2.52264	0.0124305	0.999059	FALSE
IGHV3.53	HLA-DPB1.A55D_T	0.217628	2.51603	0.0126586	0.999059	FALSE
IGHV3.53	HLA-DPB1.A56E_T	0.217628	2.51603	0.0126586	0.999059	FALSE
IGHV3.15	HLA-DRB1.A71R_A	-0.0134452	-2.51498	0.0126952	0.999059	FALSE
IGHV3.20	HLA-DQB1.F87Y_T	-0.105659	-2.50707	0.0129739	0.999059	FALSE
IGHV4.28	HLA-DQA1.A45V_A	-0.00617689	-2.50558	0.0130267	0.999059	FALSE
IGHV4.28	HLA-DQA1.A69A_T	-0.00617689	-2.50558	0.0130267	0.999059	FALSE
IGHV4.28	HLA-DQA1.C11Y_A	-0.00617689	-2.50558	0.0130267	0.999059	FALSE
IGHV4.28	HLA-DQA1.E50E_T	-0.00617689	-2.50558	0.0130267	0.999059	FALSE
IGHV4.28	HLA-DQA1.F18S_A	-0.00617689	-2.50558	0.0130267	0.999059	FALSE
IGHV4.28	HLA-DQA1.G55R_A	-0.00617689	-2.50558	0.0130267	0.999059	FALSE
IGHV4.28	HLA-DQA1.G61F_A	-0.00617689	-2.50558	0.0130267	0.999059	FALSE
IGHV4.28	HLA-DQA1.K53K_T	-0.00617689	-2.50558	0.0130267	0.999059	FALSE
IGHV4.28	HLA-DQA1.M66I_A	-0.00617689	-2.50558	0.0130267	0.999059	FALSE
IGHV4.28	HLA-DQA1.M76M_T	-0.00617689	-2.50558	0.0130267	0.999059	FALSE
IGHV4.28	HLA-DQA1.Q175Q_T	-0.00617689	-2.50558	0.0130267	0.999059	FALSE
IGHV4.28	HLA-DQA1.Q218R_A	-0.00617689	-2.50558	0.0130267	0.999059	FALSE
IGHV4.28	HLA-DQA1.R47R_T	-0.00617689	-2.50558	0.0130267	0.999059	FALSE
IGHV4.28	HLA-DQA1.R64T_A	-0.00617689	-2.50558	0.0130267	0.999059	FALSE
IGHV4.28	HLA-DQA1.S52S_T	-0.00617689	-2.50558	0.0130267	0.999059	FALSE
IGHV4.28	HLA-DQA1.W48L_A	-0.00617689	-2.50558	0.0130267	0.999059	FALSE
IGHV4.28	HLA-DQA1.Y80S_A	-0.00617689	-2.50558	0.0130267	0.999059	FALSE
IGHV3.21	HLA-A.K144Q_T	0.4638	2.50546	0.0130312	0.999059	FALSE
IGHV3.43	HLA-C.L95I_T	-0.346352	-2.50426	0.0130738	0.999059	FALSE
IGHV3.7	HLA-A.A246S_T	0.33267	2.50216	0.0131494	0.999059	FALSE
IGHV3.7	HLA-A.T299A_T	0.33267	2.50216	0.0131494	0.999059	FALSE
IGHV3.7	HLA-A.V334M_T	0.33267	2.50216	0.0131494	0.999059	FALSE
IGHV3.21	HLA-B.E163E_T	0.352071	2.50175	0.0131641	0.999059	FALSE
IGHV3.43	HLA-DQB1.D57A_T	0.405946	2.49987	0.013232	0.999059	FALSE
IGHV4.b	HLA-B.R156W_T	0.0173071	2.49672	0.0133463	0.999059	FALSE
IGHV4.b	HLA-C.A11A_A	0.0153749	2.49528	0.013399	0.999059	FALSE
IGHV4.b	HLA-C.A11S_T	0.0153749	2.49528	0.013399	0.999059	FALSE
IGHV4.b	HLA-DQB1.F9Y_A	-0.0177286	-2.49405	0.0134441	0.999059	FALSE
IGHV4.b	HLA-DQB1.L-4L_T	-0.0251188	-2.49322	0.0134745	0.999059	FALSE
IGHV1.24	HLA-B.Y9Y_A	-0.0435047	-2.49314	0.0134775	0.999059	FALSE
IGHV1.f	HLA-DPB1.I65L_T	0.0139536	2.48896	0.0136318	0.999059	FALSE
IGHV3.15	HLA-DRB1.D28E_T	0.0150573	2.48796	0.0136691	0.999059	FALSE
IGHV4.34	HLA-A.G79R_T	0.0849207	2.48273	0.0138652	0.999059	FALSE
IGHV4.34	HLA-A.G83R_T	0.0849207	2.48273	0.0138652	0.999059	FALSE
IGHV4.34	HLA-A.L81A_T	0.0849207	2.48273	0.0138652	0.999059	FALSE
IGHV4.34	HLA-A.R82L_T	0.0849207	2.48273	0.0138652	0.999059	FALSE
IGHV4.34	HLA-A.T80I_T	0.0849207	2.48273	0.0138652	0.999059	FALSE
IGHV4.34	HLA-A.V76E_T	0.0849207	2.48273	0.0138652	0.999059	FALSE
IGHV4.61	HLA-B.R156W_T	0.0499031	2.47939	0.0139918	0.999059	FALSE
IGHV3.23	HLA-C.S116Y_T	-0.505787	-2.4703	0.0143414	0.999059	FALSE
IGHV5.51	HLA-B.C325S_A	0.0900319	2.46775	0.0144407	0.999059	FALSE
IGHV3.43	HLA-C.T94I_T	-0.314877	-2.46663	0.0144846	0.999059	FALSE
IGHV3.21	HLA-A.A246S_T	0.478732	2.46594	0.0145118	0.999059	FALSE
IGHV3.21	HLA-A.T299A_T	0.478732	2.46594	0.0145118	0.999059	FALSE
IGHV3.21	HLA-A.V334M_T	0.478732	2.46594	0.0145118	0.999059	FALSE
IGHV3.21	HLA-B.Q32L_T	0.386694	2.45976	0.0147562	0.999059	FALSE
IGHV5.51	HLA-A.E152E_T	-0.139684	-2.45801	0.014826	0.999059	FALSE
IGHV3.NL1	HLA-C.S116S_T	-0.384517	-2.45754	0.0148448	0.999059	FALSE
IGHV4.b	HLA-DRB1.K12K_A	-0.0140789	-2.45377	0.0149969	0.999059	FALSE
IGHV4.b	HLA-DRB1.K12T_T	-0.0140789	-2.45377	0.0149969	0.999059	FALSE
IGHV4.b	HLA-DRB1.P11S_T	-0.0140789	-2.45377	0.0149969	0.999059	FALSE
IGHV4.b	HLA-DRB1.Q10Y_T	-0.0140789	-2.45377	0.0149969	0.999059	FALSE
IGHV4.61	HLA-B.A69R_T	0.058798	2.45272	0.0150392	0.999059	FALSE
IGHV4.61	HLA-B.E76V_T	0.058798	2.45272	0.0150392	0.999059	FALSE
IGHV4.61	HLA-B.I66K_T	0.058798	2.45272	0.0150392	0.999059	FALSE
IGHV4.28	HLA-DQA1.S52R_A	-0.00607551	-2.45252	0.0150473	0.999059	FALSE
IGHV4.34	HLA-A.I282V_T	0.084204	2.45249	0.0150484	0.999059	FALSE
IGHV4.34	HLA-A.K311N_T	0.084204	2.45249	0.0150484	0.999059	FALSE
IGHV4.34	HLA-A.Q62E_T	0.084204	2.45249	0.0150484	0.999059	FALSE
IGHV4.34	HLA-A.R65G_T	0.084204	2.45249	0.0150484	0.999059	FALSE
IGHV4.34	HLA-A.Y99F_T	0.084204	2.45249	0.0150484	0.999059	FALSE
IGHV3.33	HLA-B.H113Y_T	-1.29783	-2.45237	0.0150535	0.999059	FALSE
IGHV3.15	HLA-DQA1.E40G_T	0.0135279	2.44347	0.0154185	0.999059	FALSE
IGHV3.15	HLA-DQA1.E50V_T	0.0135279	2.44347	0.0154185	0.999059	FALSE
IGHV3.15	HLA-DQA1.F51L_T	0.0135279	2.44347	0.0154185	0.999059	FALSE
IGHV3.15	HLA-DQA1.K53Q_T	0.0135279	2.44347	0.0154185	0.999059	FALSE
IGHV3.15	HLA-DQA1.R47C_T	0.0135279	2.44347	0.0154185	0.999059	FALSE
IGHV1.69	HLA-C.E177K_T	0.213359	2.44322	0.015429	0.999059	FALSE
IGHV1.24	HLA-B.R131S_A	-0.0416278	-2.44223	0.0154699	0.999059	FALSE
IGHV3.23	HLA-B.V103L_T	-0.590149	-2.43882	0.0156124	0.999059	FALSE
IGHV4.61	HLA-DPB1.F35F_T	0.0420174	2.43825	0.0156364	0.999059	FALSE
IGHV3.21	HLA-C.D9F_T	-0.394554	-2.43649	0.0157104	0.999059	FALSE
IGHV3.21	HLA-C.R6K_T	-0.394554	-2.43649	0.0157104	0.999059	FALSE
IGHV3.21	HLA-C.S99C_T	-0.394554	-2.43649	0.0157104	0.999059	FALSE
IGHV3.21	HLA-C.V248M_T	-0.394554	-2.43649	0.0157104	0.999059	FALSE
IGHV1.24	HLA-B.I66N_T	0.0766494	2.43621	0.015722	0.999059	FALSE
IGHV1.24	HLA-B.Q65R_T	0.0766494	2.43621	0.015722	0.999059	FALSE
IGHV1.24	HLA-B.Q70S_T	0.0766494	2.43621	0.015722	0.999059	FALSE
IGHV1.24	HLA-B.R62G_T	0.0766494	2.43621	0.015722	0.999059	FALSE
IGHV1.24	HLA-B.Y67M_T	0.0766494	2.43621	0.015722	0.999059	FALSE
IGHV3.d	HLA-DQA1.D2G_T	-0.0193106	-2.43517	0.0157659	0.999059	FALSE
IGHV3.d	HLA-DQA1.V-6M_T	-0.0193106	-2.43517	0.0157659	0.999059	FALSE
IGHV1.69	HLA-C.D114N_T	0.181078	2.43327	0.0158464	0.999059	FALSE
IGHV1.18	HLA-DQB1.R55R_T	-0.119468	-2.42939	0.0160119	0.999059	FALSE
IGHV3.66	HLA-DRB1.I67L_T	0.129016	2.42418	0.0162369	0.999059	FALSE
IGHV3.66	HLA-C.E275E_A	-0.145933	-2.42089	0.01638	0.999059	FALSE
IGHV1.24	HLA-DRB1.A74A_A	-0.0377952	-2.41645	0.0165753	0.999059	FALSE
IGHV3.48	HLA-DQA1.A69L_T	-0.333291	-2.41034	0.0168474	0.999059	FALSE
IGHV3.48	HLA-DQA1.L-15M_T	-0.333291	-2.41034	0.0168474	0.999059	FALSE
IGHV1.24	HLA-B.Y116Y_T	-0.0401533	-2.40897	0.0169088	0.999059	FALSE
IGHV2.5	HLA-C.S116Y_T	-0.0315369	-2.40776	0.0169632	0.999059	FALSE
IGHV3.30.3	HLA-C.S116S_T	-0.395698	-2.40413	0.0171279	0.999059	FALSE
IGHV3.48	HLA-DQA1.Q129H_A	0.362685	2.40253	0.0172005	0.999059	FALSE
IGHV3.21	HLA-C.R219W_A	0.330405	2.39731	0.0174407	0.999059	FALSE
IGHV3.33	HLA-B.S97R_A	-0.886163	-2.39303	0.0176394	0.999059	FALSE
IGHV5.51	HLA-DQA1.A69T_T	0.132988	2.39148	0.0177119	0.999059	FALSE
IGHV4.b	HLA-B.Q70Q_T	0.0154969	2.39099	0.0177349	0.999059	FALSE
IGHV3.72	HLA-DPB1.E57D_T	0.0043086	2.38966	0.0177976	0.999059	FALSE
IGHV3.NL1	HLA-C.S116Y_T	0.35043	2.38621	0.0179606	0.999059	FALSE
IGHV1.24	HLA-C.A73T_A	-0.0374572	-2.38061	0.0182278	0.999059	FALSE
IGHV4.28	HLA-DQB1.D57V_T	-0.0132393	-2.37833	0.018338	0.999059	FALSE
IGHV1.18	HLA-A.E152E_T	-0.180502	-2.37832	0.018338	0.999059	FALSE
IGHV1.45	HLA-B.S97S_T	0.064822	2.37791	0.0183579	0.999059	FALSE
IGHV3.7	HLA-A.F9F_T	-0.237239	-2.37237	0.0186276	0.999059	FALSE
IGHV3.20	HLA-DRB1.S37Y_T	-0.105882	-2.37146	0.0186726	0.999059	FALSE
IGHV3.43	HLA-C.L95L_A	-0.323802	-2.37129	0.0186807	0.999059	FALSE
IGHV1.45	HLA-DRB1.A74R_T	0.0680884	2.36937	0.018775	0.999059	FALSE
IGHV1.24	HLA-DRB1.F26Y_T	-0.0438646	-2.36917	0.0187852	0.999059	FALSE
IGHV4.b	HLA-DRB1.D28D_A	0.0134642	2.36875	0.018806	0.999059	FALSE
IGHV4.b	HLA-DRB1.Y30Y_A	0.0134642	2.36875	0.018806	0.999059	FALSE
IGHV4.b	HLA-DRB1.Q10Q_A	-0.0138335	-2.36725	0.0188799	0.999059	FALSE
IGHV4.30.2	HLA-DQB1.D57S_T	0.0496827	2.36496	0.0189941	0.999059	FALSE
IGHV4.30.2	HLA-DQB1.Q126H_T	0.0496827	2.36496	0.0189941	0.999059	FALSE
IGHV4.b	HLA-DRB1.H16H_A	-0.0163737	-2.3634	0.0190719	0.999059	FALSE
IGHV3.21	HLA-DQA1.A199T_T	-0.573115	-2.36227	0.0191285	0.999059	FALSE
IGHV1.18	HLA-DRB1.R4Q_T	0.136207	2.36086	0.0191996	0.999059	FALSE
IGHV1.18	HLA-DRB1.R4R_A	0.136207	2.36086	0.0191996	0.999059	FALSE
IGHV1.18	HLA-DRB1.Y78V_T	0.136207	2.36086	0.0191996	0.999059	FALSE
IGHV1.18	HLA-DRB1.Y78Y_A	0.136207	2.36086	0.0191996	0.999059	FALSE
IGHV2.26	HLA-B.S11A_A	0.0237783	2.36071	0.0192068	0.999059	FALSE
IGHV2.26	HLA-B.V12M_A	0.0237783	2.36071	0.0192068	0.999059	FALSE
IGHV4.28	HLA-DQA1.Q129H_A	-0.00625186	-2.36	0.0192428	0.999059	FALSE
IGHV1.69	HLA-C.S24A_A	-0.138205	-2.35832	0.0193276	0.999059	FALSE
IGHV3.20	HLA-C.V304M_T	0.102123	2.35662	0.0194138	0.999059	FALSE
IGHV3.20	HLA-C.V304V_A	0.102123	2.35662	0.0194138	0.999059	FALSE
IGHV5.51	HLA-B.C325C_T	0.0855719	2.35661	0.0194141	0.999059	FALSE
IGHV3.30.3	HLA-C.S116Y_T	0.363521	2.35373	0.0195611	0.999059	FALSE
IGHV1.3	HLA-DQB1.F9Y_A	-0.207205	-2.3511	0.0196961	0.999059	FALSE
IGHV3.20	HLA-DQB1.G70R_A	-0.0924605	-2.3491	0.0197994	0.999059	FALSE
IGHV3.7	HLA-B.S-10W_T	0.216831	2.34349	0.0200909	0.999059	FALSE
IGHV2.70	HLA-DRB1.S37F_T	-0.0851796	-2.34337	0.0200971	0.999059	FALSE
IGHV4.30.2	HLA-C.E177K_T	-0.053997	-2.34231	0.020153	0.999059	FALSE
IGHV3.21	HLA-B.A69R_T	-0.465584	-2.34184	0.0201775	0.999059	FALSE
IGHV3.21	HLA-B.E76V_T	-0.465584	-2.34184	0.0201775	0.999059	FALSE
IGHV3.21	HLA-B.I66K_T	-0.465584	-2.34184	0.0201775	0.999059	FALSE
IGHV3.21	HLA-B.R156L_A	-0.359963	-2.34001	0.0202742	0.999059	FALSE
IGHV1.24	HLA-B.A-9G_A	-0.038728	-2.33967	0.0202921	0.999059	FALSE
IGHV4.b	HLA-B.Y67Y_T	0.0149364	2.33557	0.0205094	0.999059	FALSE
IGHV1.18	HLA-DRB1.Y60Y_A	0.115283	2.33194	0.0207039	0.999059	FALSE
IGHV4.61	HLA-DPB1.A55E_A	0.037762	2.33124	0.0207419	0.999059	FALSE
IGHV3.23	HLA-B.Y116L_T	-0.613991	-2.33102	0.0207535	0.999059	FALSE
IGHV2.70	HLA-A.D116D_A	-0.0498216	-2.32822	0.020905	0.999059	FALSE
IGHV3.43	HLA-DPB1.A36V_A	0.341935	2.32786	0.0209243	0.999059	FALSE
IGHV3.43	HLA-DPB1.A55A_T	0.341935	2.32786	0.0209243	0.999059	FALSE
IGHV3.21	HLA-A.P184A_T	-0.333398	-2.32773	0.0209315	0.999059	FALSE
IGHV3.64	HLA-DQA1.M207V_A	-0.188338	-2.32734	0.0209528	0.999059	FALSE
IGHV4.28	HLA-DQB1.F87Y_T	-0.00648359	-2.32537	0.02106	0.999059	FALSE
IGHV1.45	HLA-DQB1.F9Y_A	0.0408099	2.32494	0.0210836	0.999059	FALSE
IGHV1.24	HLA-DRB1.Q70D_T	0.0369471	2.32292	0.0211941	0.999059	FALSE
IGHV1.24	HLA-DQB1.T185I_T	-0.0392175	-2.32127	0.0212845	0.999059	FALSE
IGHV3.43	HLA-DRB1.A73G_T	0.440001	2.32059	0.0213225	0.999059	FALSE
IGHV3.d	HLA-A.A246S_T	0.0165218	2.32029	0.0213389	0.999059	FALSE
IGHV3.d	HLA-A.T299A_T	0.0165218	2.32029	0.0213389	0.999059	FALSE
IGHV3.d	HLA-A.V334M_T	0.0165218	2.32029	0.0213389	0.999059	FALSE
IGHV3.33	HLA-DQA1.M207V_A	0.953965	2.31949	0.0213833	0.999059	FALSE
IGHV2.5	HLA-C.N80K_T	0.0470382	2.31641	0.0215542	0.999059	FALSE
IGHV2.5	HLA-C.S77N_T	0.0470382	2.31641	0.0215542	0.999059	FALSE
IGHV3.21	HLA-A.E63N_T	0.497014	2.31343	0.0217206	0.999059	FALSE
IGHV3.21	HLA-A.Q62R_T	0.497014	2.31343	0.0217206	0.999059	FALSE
IGHV1.18	HLA-DRB1.F31I_T	0.142715	2.31335	0.0217253	0.999059	FALSE
IGHV4.30.4	HLA-DQB1.D57V_T	0.00716954	2.31204	0.0217989	0.999059	FALSE
IGHV1.18	HLA-B.R145L_T	0.168495	2.30629	0.0221242	0.999059	FALSE
IGHV1.18	HLA-DRB1.A74R_T	-0.227525	-2.30624	0.0221273	0.999059	FALSE
IGHV3.7	HLA-A.H151R_T	0.320691	2.30484	0.0222069	0.999059	FALSE
IGHV3.9	HLA-DQB1.G125G_T	0.989936	2.3028	0.0223239	0.999059	FALSE
IGHV4.b	HLA-DQA1.E50L_T	0.0139415	2.30241	0.0223465	0.999059	FALSE
IGHV4.b	HLA-DQA1.F215L_T	0.0139415	2.30241	0.0223465	0.999059	FALSE
IGHV4.b	HLA-DQA1.K53R_T	0.0139415	2.30241	0.0223465	0.999059	FALSE
IGHV3.43	HLA-C.D9Y_T	-0.263952	-2.30194	0.0223735	0.999059	FALSE
IGHV1.24	HLA-DQA1.Q34E_T	-0.0334981	-2.29987	0.022493	0.999059	FALSE
IGHV4.30.2	HLA-C.A152T_T	-0.0533179	-2.2988	0.0225547	0.999059	FALSE
IGHV4.30.2	HLA-C.E275G_T	-0.0533179	-2.2988	0.0225547	0.999059	FALSE
IGHV4.30.2	HLA-C.R35Q_T	-0.0533179	-2.2988	0.0225547	0.999059	FALSE
IGHV4.30.2	HLA-C.R35R_A	-0.0533179	-2.2988	0.0225547	0.999059	FALSE
IGHV3.d	HLA-A.K144Q_T	0.0156076	2.29702	0.0226579	0.999059	FALSE
IGHV3.48	HLA-DPA1.K111R_A	0.329243	2.29649	0.0226892	0.999059	FALSE
IGHV3.48	HLA-DPA1.M31Q_A	0.329243	2.29649	0.0226892	0.999059	FALSE
IGHV3.64	HLA-DQB1.G125G_T	-0.187094	-2.29552	0.0227457	0.999059	FALSE
IGHV3.7	HLA-A.D74H_T	-0.234942	-2.2951	0.0227702	0.999059	FALSE
IGHV3.7	HLA-A.G107W_T	-0.234942	-2.2951	0.0227702	0.999059	FALSE
IGHV3.7	HLA-A.Q62G_T	-0.234942	-2.2951	0.0227702	0.999059	FALSE
IGHV4.61	HLA-C.L156L_A	0.0373501	2.29252	0.0229214	0.999059	FALSE
IGHV1.18	HLA-DRB1.D28H_T	0.145265	2.29016	0.0230603	0.999059	FALSE
IGHV1.18	HLA-DRB1.P11D_T	0.145265	2.29016	0.0230603	0.999059	FALSE
IGHV1.18	HLA-DRB1.W9K_T	0.145265	2.29016	0.0230603	0.999059	FALSE
IGHV1.18	HLA-DRB1.Y30G_T	0.145265	2.29016	0.0230603	0.999059	FALSE
IGHV3.d	HLA-A.E63N_T	0.0180114	2.28903	0.0231274	0.999059	FALSE
IGHV3.d	HLA-A.Q62R_T	0.0180114	2.28903	0.0231274	0.999059	FALSE
IGHV3.20	HLA-DRB1.Y60Y_A	0.0863443	2.2885	0.0231585	0.999059	FALSE
IGHV1.24	HLA-B.I66I_A	0.044072	2.28512	0.0233599	0.999059	FALSE
IGHV3.66	HLA-C.D114N_T	-0.13766	-2.28499	0.0233676	0.999059	FALSE
IGHV1.69	HLA-C.S116F_T	0.166139	2.28471	0.0233845	0.999059	FALSE
IGHV4.4	HLA-B.E163T_T	0.0902239	2.28305	0.0234843	0.999059	FALSE
IGHV2.70	HLA-DPB1.E57D_T	-0.0797951	-2.2829	0.0234931	0.999059	FALSE
IGHV4.b	HLA-DRB1.Q149H_T	-0.0133782	-2.28069	0.0236262	0.999059	FALSE
IGHV3.49	HLA-A.E63N_T	0.00977291	2.28063	0.0236298	0.999059	FALSE
IGHV3.49	HLA-A.Q62R_T	0.00977291	2.28063	0.0236298	0.999059	FALSE
IGHV4.34	HLA-A.E166D_T	0.0768514	2.27951	0.0236972	0.999059	FALSE
IGHV4.34	HLA-A.W167G_T	0.0768514	2.27951	0.0236972	0.999059	FALSE
IGHV3.21	HLA-B.C325S_A	0.316175	2.27895	0.0237313	0.999059	FALSE
IGHV5.51	HLA-DRB1.Q70D_T	0.0859137	2.27541	0.0239469	0.999059	FALSE
IGHV3.20	HLA-DQB1.E74E_A	-0.0903072	-2.27412	0.0240258	0.999059	FALSE
IGHV3.20	HLA-DQB1.L75V_T	-0.0903072	-2.27412	0.0240258	0.999059	FALSE
IGHV3.20	HLA-DQB1.T71T_A	-0.0903072	-2.27412	0.0240258	0.999059	FALSE
IGHV1.24	HLA-B.D177E_A	-0.0416068	-2.27311	0.0240875	0.999059	FALSE
IGHV1.24	HLA-B.E180Q_A	-0.0416068	-2.27311	0.0240875	0.999059	FALSE
IGHV1.69	HLA-C.L156R_T	-0.139019	-2.27239	0.0241317	0.999059	FALSE
IGHV1.69	HLA-C.S99Y_A	-0.13042	-2.27153	0.0241845	0.999059	FALSE
IGHV3.33	HLA-DRB1.S37S_T	0.930203	2.27003	0.0242774	0.999059	FALSE
IGHV3.7	HLA-A.K144Q_T	0.28865	2.26962	0.0243025	0.999059	FALSE
IGHV3.21	HLA-B.Y9H_T	0.357166	2.26762	0.024427	0.999059	FALSE
IGHV5.51	HLA-B.E163T_T	-0.106002	-2.26627	0.0245108	0.999059	FALSE
IGHV4.4	HLA-B.E45E_T	0.0887363	2.26553	0.0245567	0.999059	FALSE
IGHV1.69	HLA-C.E275E_A	0.169214	2.26458	0.0246163	0.999059	FALSE
IGHV3.d	HLA-DRB1.I67L_T	-0.0128855	-2.26136	0.0248185	0.999059	FALSE
IGHV2.26	HLA-B.S97R_A	0.0195036	2.26074	0.0248577	0.999059	FALSE
IGHV4.b	HLA-DQB1.F87F_T	-0.016933	-2.25829	0.0250129	0.999059	FALSE
IGHV2.5	HLA-B.D177E_A	0.0368089	2.25575	0.0251744	0.999059	FALSE
IGHV2.5	HLA-B.E180Q_A	0.0368089	2.25575	0.0251744	0.999059	FALSE
IGHV4.4	HLA-B.N63E_A	0.0718566	2.25498	0.0252233	0.999059	FALSE
IGHV1.24	HLA-C.D90A_A	-0.0375558	-2.2549	0.0252283	0.999059	FALSE
IGHV4.b	HLA-DRB1.A-15A_A	-0.0133198	-2.25451	0.0252538	0.999059	FALSE
IGHV4.b	HLA-DRB1.A-15V_T	-0.0133198	-2.25451	0.0252538	0.999059	FALSE
IGHV4.b	HLA-DRB1.K-24R_T	-0.0133198	-2.25451	0.0252538	0.999059	FALSE
IGHV1.18	HLA-DQA1.Q175E_T	0.108139	2.2531	0.0253436	0.999059	FALSE
IGHV4.30.2	HLA-B.Y67S_A	0.0350948	2.25287	0.0253588	0.999059	FALSE
IGHV4.28	HLA-DQA1.E40G_T	0.00636417	2.25204	0.0254118	0.999059	FALSE
IGHV4.28	HLA-DQA1.E50V_T	0.00636417	2.25204	0.0254118	0.999059	FALSE
IGHV4.28	HLA-DQA1.F51L_T	0.00636417	2.25204	0.0254118	0.999059	FALSE
IGHV4.28	HLA-DQA1.K53Q_T	0.00636417	2.25204	0.0254118	0.999059	FALSE
IGHV4.28	HLA-DQA1.R47C_T	0.00636417	2.25204	0.0254118	0.999059	FALSE
IGHV1.18	HLA-DRB1.T181M_T	0.124035	2.2484	0.0256472	0.999059	FALSE
IGHV1.18	HLA-DRB1.T181T_A	0.124035	2.2484	0.0256472	0.999059	FALSE
IGHV4.28	HLA-DQA1.M76L_T	0.00615135	2.24833	0.0256515	0.999059	FALSE
IGHV2.70	HLA-A.D116Y_T	-0.0480381	-2.24789	0.02568	0.999059	FALSE
IGHV2.70	HLA-A.I95I_A	-0.0480381	-2.24789	0.02568	0.999059	FALSE
IGHV2.70	HLA-A.N66K_T	-0.0480381	-2.24789	0.02568	0.999059	FALSE
IGHV2.70	HLA-A.R114H_T	-0.0480381	-2.24789	0.02568	0.999059	FALSE
IGHV4.61	HLA-C.D9S_T	0.0720445	2.24643	0.0257753	0.999059	FALSE
IGHV3.d	HLA-DQA1.A199T_T	-0.0199681	-2.24483	0.0258792	0.999059	FALSE
IGHV1.24	HLA-DRB1.S37N_T	-0.0408385	-2.24246	0.026035	0.999059	FALSE
IGHV4.30.2	HLA-B.T94I_T	-0.0406139	-2.24227	0.0260473	0.999059	FALSE
IGHV4.30.2	HLA-B.T94T_A	-0.0406139	-2.24227	0.0260473	0.999059	FALSE
IGHV1.45	HLA-DRB1.T77N_T	0.0618243	2.24128	0.0261125	0.999059	FALSE
IGHV3.20	HLA-DQB1.A-26S_T	-0.0988745	-2.23968	0.0262179	0.999059	FALSE
IGHV3.20	HLA-DQB1.G125S_T	-0.0988745	-2.23968	0.0262179	0.999059	FALSE
IGHV3.20	HLA-DQB1.L-4S_T	-0.0988745	-2.23968	0.0262179	0.999059	FALSE
IGHV3.20	HLA-DQB1.M-8I_T	-0.0988745	-2.23968	0.0262179	0.999059	FALSE
IGHV3.20	HLA-DQB1.M14L_T	-0.0988745	-2.23968	0.0262179	0.999059	FALSE
IGHV3.20	HLA-DQB1.Q224R_T	-0.0988745	-2.23968	0.0262179	0.999059	FALSE
IGHV3.20	HLA-DQB1.T71A_T	-0.0988745	-2.23968	0.0262179	0.999059	FALSE
IGHV3.20	HLA-DQB1.V116I_T	-0.0988745	-2.23968	0.0262179	0.999059	FALSE
IGHV3.66	HLA-C.S116F_T	-0.131686	-2.23964	0.0262208	0.999059	FALSE
IGHV4.b	HLA-DRB1.R4Q_T	0.0152967	2.23852	0.0262948	0.999059	FALSE
IGHV4.b	HLA-DRB1.R4R_A	0.0152967	2.23852	0.0262948	0.999059	FALSE
IGHV4.b	HLA-DRB1.Y78V_T	0.0152967	2.23852	0.0262948	0.999059	FALSE
IGHV4.b	HLA-DRB1.Y78Y_A	0.0152967	2.23852	0.0262948	0.999059	FALSE
IGHV4.30.2	HLA-B.D74Y_A	0.0367437	2.23714	0.0263867	0.999059	FALSE
IGHV4.39	HLA-DPA1.A11M_A	0.226734	2.23559	0.0264898	0.999059	FALSE
IGHV3.d	HLA-B.Y116Y_T	0.0122777	2.23002	0.0268631	0.999059	FALSE
IGHV4.61	HLA-DPB1.F35L_A	0.0359452	2.22963	0.0268896	0.999059	FALSE
IGHV5.51	HLA-A.A149T_T	-0.139054	-2.22792	0.0270059	0.999059	FALSE
IGHV3.21	HLA-B.E152V_A	-0.289883	-2.22579	0.0271501	0.999059	FALSE
IGHV1.69	HLA-B.R156W_T	-0.15774	-2.22541	0.0271764	0.999059	FALSE
IGHV3.15	HLA-DQB1.R55R_T	-0.0108451	-2.22529	0.0271848	0.999059	FALSE
IGHV3.21	HLA-C.A11A_A	-0.330353	-2.2229	0.0273479	0.999059	FALSE
IGHV3.21	HLA-C.A11S_T	-0.330353	-2.2229	0.0273479	0.999059	FALSE
IGHV3.53	HLA-DQA1.Q175E_T	-0.173132	-2.22262	0.0273671	0.999059	FALSE
IGHV1.69	HLA-C.S116Y_T	-0.124867	-2.22162	0.0274356	0.999059	FALSE
IGHV4.61	HLA-DQB1.Y30Y_A	0.0409542	2.22118	0.0274659	0.999059	FALSE
IGHV3.21	HLA-C.S116Y_T	-0.294423	-2.2208	0.027492	0.999059	FALSE
IGHV3.7	HLA-B.V282I_A	0.205231	2.22036	0.0275225	0.999059	FALSE
IGHV2.26	HLA-B.A69A_T	0.023379	2.21975	0.027565	0.999059	FALSE
IGHV1.24	HLA-B.Y9H_T	-0.0388056	-2.21678	0.0277701	0.999059	FALSE
IGHV3.7	HLA-A.I97R_T	-0.223964	-2.21615	0.0278142	0.999059	FALSE
IGHV3.49	HLA-A.R114Q_T	0.00897416	2.21408	0.0279583	0.999059	FALSE
IGHV1.69	HLA-B.R156L_A	-0.144578	-2.21377	0.0279801	0.999059	FALSE
IGHV3.21	HLA-B.Y67Y_T	-0.340577	-2.2119	0.0281115	0.999059	FALSE
IGHV3.21	HLA-B.Q70Q_T	-0.3452	-2.21065	0.0281991	0.999059	FALSE
IGHV1.69	HLA-B.L95L_A	0.132471	2.20774	0.0284052	0.999059	FALSE
IGHV4.4	HLA-B.S97R_A	0.0748845	2.20657	0.0284877	0.999059	FALSE
IGHV4.b	HLA-DRB1.K98E_T	0.0134368	2.20507	0.0285947	0.999059	FALSE
IGHV4.b	HLA-DRB1.S104A_T	0.0134368	2.20507	0.0285947	0.999059	FALSE
IGHV3.d	HLA-DQB1.E74E_A	-0.0119605	-2.20476	0.0286168	0.999059	FALSE
IGHV3.d	HLA-DQB1.L75V_T	-0.0119605	-2.20476	0.0286168	0.999059	FALSE
IGHV3.d	HLA-DQB1.T71T_A	-0.0119605	-2.20476	0.0286168	0.999059	FALSE
IGHV4.61	HLA-DPA1.K111R_A	0.0378297	2.20416	0.0286595	0.999059	FALSE
IGHV4.61	HLA-DPA1.M31Q_A	0.0378297	2.20416	0.0286595	0.999059	FALSE
IGHV3.20	HLA-DQB1.D-20G_A	-0.0878726	-2.20363	0.0286973	0.999059	FALSE
IGHV3.20	HLA-DQB1.L-4P_A	-0.0878726	-2.20363	0.0286973	0.999059	FALSE
IGHV3.20	HLA-DQB1.L-3V_A	-0.0878726	-2.20363	0.0286973	0.999059	FALSE
IGHV3.20	HLA-DQB1.S-5S_T	-0.0878726	-2.20363	0.0286973	0.999059	FALSE
IGHV3.20	HLA-DQB1.V203I_A	-0.0878726	-2.20363	0.0286973	0.999059	FALSE
IGHV1.45	HLA-DQB1.G125G_T	0.0384112	2.20101	0.0288851	0.999059	FALSE
IGHV1.3	HLA-DQB1.G125G_T	-0.192709	-2.19862	0.0290578	0.999059	FALSE
IGHV3.21	HLA-C.L-14I_A	0.342294	2.19845	0.0290703	0.999059	FALSE
IGHV3.20	HLA-DRB1.D28H_T	0.10647	2.19823	0.0290857	0.999059	FALSE
IGHV3.20	HLA-DRB1.P11D_T	0.10647	2.19823	0.0290857	0.999059	FALSE
IGHV3.20	HLA-DRB1.W9K_T	0.10647	2.19823	0.0290857	0.999059	FALSE
IGHV3.20	HLA-DRB1.Y30G_T	0.10647	2.19823	0.0290857	0.999059	FALSE
IGHV4.4	HLA-DQB1.F9F_T	-0.111825	-2.19718	0.029162	0.999059	FALSE
IGHV3.74	HLA-DRB1.F47Y_A	0.194041	2.19567	0.0292717	0.999059	FALSE
IGHV4.30.2	HLA-C.S99F_T	0.0603087	2.19531	0.0292975	0.999059	FALSE
IGHV1.2	HLA-C.C1G_T	-0.128639	-2.19319	0.0294526	0.999059	FALSE
IGHV4.4	HLA-B.L-22R_A	0.0987805	2.19218	0.0295263	0.999059	FALSE
IGHV4.4	HLA-B.M-20T_A	0.0987805	2.19218	0.0295263	0.999059	FALSE
IGHV1.24	HLA-DQB1.V-17A_T	0.0323359	2.19186	0.0295498	0.999059	FALSE
IGHV7.4.1	HLA-DQB1.G45E_T	0.0921935	2.19128	0.0295926	0.999059	FALSE
IGHV4.61	HLA-DQB1.G125G_T	-0.045009	-2.18923	0.0297432	0.999059	FALSE
IGHV4.39	HLA-DPB1.A55D_T	0.241653	2.18743	0.0298763	0.999059	FALSE
IGHV4.39	HLA-DPB1.A56E_T	0.241653	2.18743	0.0298763	0.999059	FALSE
IGHV3.20	HLA-DQB1.Y30H_T	-0.0950629	-2.18692	0.0299142	0.999059	FALSE
IGHV1.18	HLA-DRB1.D57S_T	-0.164369	-2.18632	0.0299587	0.999059	FALSE
IGHV1.f	HLA-B.S77S_A	0.00685598	2.18618	0.0299691	0.999059	FALSE
IGHV5.51	HLA-DPB1.M76M_A	0.0943133	2.18498	0.0300582	0.999059	FALSE
IGHV5.a	HLA-C.D9D_T	-0.00120242	-2.18419	0.0301168	0.999059	FALSE
IGHV4.b	HLA-DRB1.T181M_T	0.0142474	2.18194	0.0302851	0.999059	FALSE
IGHV4.b	HLA-DRB1.T181T_A	0.0142474	2.18194	0.0302851	0.999059	FALSE
IGHV4.4	HLA-B.A158T_T	0.120551	2.18139	0.0303266	0.999059	FALSE
IGHV1.18	HLA-DRB1.F31F_A	0.127342	2.18026	0.0304113	0.999059	FALSE
IGHV1.18	HLA-DRB1.R13F_T	0.127342	2.18026	0.0304113	0.999059	FALSE
IGHV3.15	HLA-C.R219W_A	0.0104709	2.17983	0.0304437	0.999059	FALSE
IGHV3.21	HLA-B.E163L_T	-0.291833	-2.17868	0.0305308	0.999059	FALSE
IGHV5.51	HLA-DQA1.A-12T_T	-0.152599	-2.17824	0.0305638	0.999059	FALSE
IGHV4.30.2	HLA-DRB1.H16H_A	-0.0406323	-2.17763	0.0306101	0.999059	FALSE
IGHV1.58	HLA-DPB1.V205M_T	-0.0204718	-2.17731	0.0306338	0.999059	FALSE
IGHV3.NL1	HLA-B.S97R_A	-0.368171	-2.17636	0.0307058	0.999059	FALSE
IGHV1.18	HLA-DRB1.A71K_T	-0.198464	-2.17587	0.0307435	0.999059	FALSE
IGHV3.NL1	HLA-DPB1.V205M_T	0.336796	2.17555	0.0307671	0.999059	FALSE
IGHV3.21	HLA-A.H151R_T	0.441404	2.17034	0.031165	0.999059	FALSE
IGHV2.70	HLA-B.R156W_T	-0.0530986	-2.16798	0.0313469	0.999059	FALSE
IGHV1.18	HLA-DRB1.T77N_T	-0.20525	-2.1672	0.031407	0.999059	FALSE
IGHV4.28	HLA-DQA1.A69T_T	0.00811598	2.16668	0.0314478	0.999059	FALSE
IGHV1.69	HLA-C.R219W_A	0.12691	2.16638	0.0314707	0.999059	FALSE
IGHV3.7	HLA-B.A305T_A	0.202058	2.16541	0.0315457	0.999059	FALSE
IGHV3.53	HLA-DPB1.F35F_T	0.176431	2.15994	0.0319733	0.999059	FALSE
IGHV1.3	HLA-B.Y116F_T	-0.258193	-2.15866	0.0320739	0.999059	FALSE
IGHV3.20	HLA-DRB1.R4Q_T	0.0950461	2.15472	0.0323853	0.999059	FALSE
IGHV3.20	HLA-DRB1.R4R_A	0.0950461	2.15472	0.0323853	0.999059	FALSE
IGHV3.20	HLA-DRB1.Y78V_T	0.0950461	2.15472	0.0323853	0.999059	FALSE
IGHV3.20	HLA-DRB1.Y78Y_A	0.0950461	2.15472	0.0323853	0.999059	FALSE
IGHV3.53	HLA-DQA1.E50L_T	-0.179255	-2.15469	0.0323878	0.999059	FALSE
IGHV3.53	HLA-DQA1.F215L_T	-0.179255	-2.15469	0.0323878	0.999059	FALSE
IGHV3.53	HLA-DQA1.K53R_T	-0.179255	-2.15469	0.0323878	0.999059	FALSE
IGHV1.3	HLA-A.I95L_T	0.200802	2.15251	0.032561	0.999059	FALSE
IGHV1.24	HLA-B.Q32L_T	-0.0377147	-2.15229	0.0325786	0.999059	FALSE
IGHV3.15	HLA-DPB1.A55D_T	0.0113888	2.15156	0.032637	0.999059	FALSE
IGHV3.15	HLA-DPB1.A56E_T	0.0113888	2.15156	0.032637	0.999059	FALSE
IGHV4.b	HLA-DRB1.W9E_A	0.0124995	2.1466	0.0330352	0.999059	FALSE
IGHV3.30.3	HLA-DQA1.Q129H_A	0.375339	2.14539	0.0331332	0.999059	FALSE
IGHV4.61	HLA-C.A11A_A	0.0385245	2.14526	0.033144	0.999059	FALSE
IGHV4.61	HLA-C.A11S_T	0.0385245	2.14526	0.033144	0.999059	FALSE
IGHV3.49	HLA-DQB1.T77R_T	0.00664876	2.14446	0.0332086	0.999059	FALSE
IGHV3.49	HLA-DQB1.T77T_A	0.00664876	2.14446	0.0332086	0.999059	FALSE
IGHV3.30.3	HLA-DPB1.A55D_T	-0.380888	-2.14417	0.0332325	0.999059	FALSE
IGHV3.30.3	HLA-DPB1.A56E_T	-0.380888	-2.14417	0.0332325	0.999059	FALSE
IGHV2.26	HLA-C.A152T_T	-0.0252434	-2.14408	0.0332397	0.999059	FALSE
IGHV2.26	HLA-C.E275G_T	-0.0252434	-2.14408	0.0332397	0.999059	FALSE
IGHV2.26	HLA-C.R35Q_T	-0.0252434	-2.14408	0.0332397	0.999059	FALSE
IGHV2.26	HLA-C.R35R_A	-0.0252434	-2.14408	0.0332397	0.999059	FALSE
IGHV3.21	HLA-B.S24T_T	0.302523	2.14323	0.0333089	0.999059	FALSE
IGHV1.f	HLA-DPB1.E57D_T	0.0108553	2.14266	0.0333551	0.999059	FALSE
IGHV4.61	HLA-DQB1.T77R_T	0.0402229	2.1424	0.0333765	0.999059	FALSE
IGHV4.61	HLA-DQB1.T77T_A	0.0402229	2.1424	0.0333765	0.999059	FALSE
IGHV4.28	HLA-B.N63E_A	0.00543381	2.14201	0.0334076	0.999059	FALSE
IGHV4.30.2	HLA-C.D9F_T	0.0389024	2.142	0.0334091	0.999059	FALSE
IGHV4.30.2	HLA-C.R6K_T	0.0389024	2.142	0.0334091	0.999059	FALSE
IGHV4.30.2	HLA-C.S99C_T	0.0389024	2.142	0.0334091	0.999059	FALSE
IGHV4.30.2	HLA-C.V248M_T	0.0389024	2.142	0.0334091	0.999059	FALSE
IGHV3.20	HLA-DQB1.R55R_T	-0.08059	-2.14144	0.0334548	0.999059	FALSE
IGHV2.26	HLA-C.E177K_T	-0.0250719	-2.14141	0.0334569	0.999059	FALSE
IGHV3.43	HLA-DQA1.Q129H_A	-0.270814	-2.14093	0.0334961	0.999059	FALSE
IGHV6.1	HLA-B.A69A_T	0.107462	2.13982	0.0335866	0.999059	FALSE
IGHV1.69	HLA-DQA1.A69L_T	-0.124617	-2.13967	0.0335989	0.999059	FALSE
IGHV1.69	HLA-DQA1.L-15M_T	-0.124617	-2.13967	0.0335989	0.999059	FALSE
IGHV1.45	HLA-DQA1.R41K_T	0.0563082	2.13951	0.0336127	0.999059	FALSE
IGHV1.45	HLA-DQA1.S130A_T	0.0563082	2.13951	0.0336127	0.999059	FALSE
IGHV3.NL1	HLA-DPB1.A55D_T	-0.361079	-2.13671	0.0338424	0.999059	FALSE
IGHV3.NL1	HLA-DPB1.A56E_T	-0.361079	-2.13671	0.0338424	0.999059	FALSE
IGHV4.30.2	HLA-C.S116Y_T	0.0316862	2.13616	0.0338877	0.999059	FALSE
IGHV3.21	HLA-B.C325C_T	0.295014	2.13598	0.0339025	0.999059	FALSE
IGHV3.30.3	HLA-DQA1.D2G_T	0.541467	2.13579	0.0339185	0.999059	FALSE
IGHV3.30.3	HLA-DQA1.V-6M_T	0.541467	2.13579	0.0339185	0.999059	FALSE
IGHV3.21	HLA-B.R131S_A	0.328851	2.1357	0.0339263	0.999059	FALSE
IGHV1.18	HLA-DRB1.A74L_T	-0.190451	-2.13505	0.0339797	0.999059	FALSE
IGHV1.18	HLA-DRB1.R189S_T	-0.190451	-2.13505	0.0339797	0.999059	FALSE
IGHV4.b	HLA-DQA1.A69L_T	0.0121946	2.13417	0.0340523	0.999059	FALSE
IGHV4.b	HLA-DQA1.L-15M_T	0.0121946	2.13417	0.0340523	0.999059	FALSE
IGHV4.b	HLA-DRB1.H16Y_T	-0.0150819	-2.13285	0.0341623	0.999059	FALSE
IGHV4.b	HLA-DRB1.R13G_T	-0.0150819	-2.13285	0.0341623	0.999059	FALSE
IGHV4.34	HLA-DPB1.A55D_T	0.0611	2.13165	0.0342623	0.999059	FALSE
IGHV4.34	HLA-DPB1.A56E_T	0.0611	2.13165	0.0342623	0.999059	FALSE
IGHV1.24	HLA-DQB1.G45E_T	0.0426404	2.13026	0.0343777	0.999059	FALSE
IGHV3.21	HLA-B.R156W_T	-0.356372	-2.12933	0.0344557	0.999059	FALSE
IGHV3.20	HLA-DRB1.A140T_A	0.0802359	2.12874	0.0345057	0.999059	FALSE
IGHV4.28	HLA-DQB1.A86E_A	-0.00529463	-2.12826	0.0345459	0.999059	FALSE
IGHV4.28	HLA-DQB1.E84Q_A	-0.00529463	-2.12826	0.0345459	0.999059	FALSE
IGHV4.28	HLA-DQB1.F87L_A	-0.00529463	-2.12826	0.0345459	0.999059	FALSE
IGHV4.28	HLA-DQB1.G89T_A	-0.00529463	-2.12826	0.0345459	0.999059	FALSE
IGHV4.28	HLA-DQB1.G125A_A	-0.00529463	-2.12826	0.0345459	0.999059	FALSE
IGHV4.28	HLA-DQB1.I90T_A	-0.00529463	-2.12826	0.0345459	0.999059	FALSE
IGHV4.28	HLA-DQB1.Q221H_A	-0.00529463	-2.12826	0.0345459	0.999059	FALSE
IGHV4.28	HLA-DQB1.Q53L_A	-0.00529463	-2.12826	0.0345459	0.999059	FALSE
IGHV4.28	HLA-DQB1.R220H_A	-0.00529463	-2.12826	0.0345459	0.999059	FALSE
IGHV4.28	HLA-DQB1.V85L_A	-0.00529463	-2.12826	0.0345459	0.999059	FALSE
IGHV4.b	HLA-B.E152V_A	0.0115326	2.12681	0.0346671	0.999059	FALSE
IGHV3.48	HLA-DQA1.A45V_A	0.300117	2.1261	0.0347271	0.999059	FALSE
IGHV3.48	HLA-DQA1.A69A_T	0.300117	2.1261	0.0347271	0.999059	FALSE
IGHV3.48	HLA-DQA1.C11Y_A	0.300117	2.1261	0.0347271	0.999059	FALSE
IGHV3.48	HLA-DQA1.E50E_T	0.300117	2.1261	0.0347271	0.999059	FALSE
IGHV3.48	HLA-DQA1.F18S_A	0.300117	2.1261	0.0347271	0.999059	FALSE
IGHV3.48	HLA-DQA1.G55R_A	0.300117	2.1261	0.0347271	0.999059	FALSE
IGHV3.48	HLA-DQA1.G61F_A	0.300117	2.1261	0.0347271	0.999059	FALSE
IGHV3.48	HLA-DQA1.K53K_T	0.300117	2.1261	0.0347271	0.999059	FALSE
IGHV3.48	HLA-DQA1.M66I_A	0.300117	2.1261	0.0347271	0.999059	FALSE
IGHV3.48	HLA-DQA1.M76M_T	0.300117	2.1261	0.0347271	0.999059	FALSE
IGHV3.48	HLA-DQA1.Q175Q_T	0.300117	2.1261	0.0347271	0.999059	FALSE
IGHV3.48	HLA-DQA1.Q218R_A	0.300117	2.1261	0.0347271	0.999059	FALSE
IGHV3.48	HLA-DQA1.R47R_T	0.300117	2.1261	0.0347271	0.999059	FALSE
IGHV3.48	HLA-DQA1.R64T_A	0.300117	2.1261	0.0347271	0.999059	FALSE
IGHV3.48	HLA-DQA1.S52S_T	0.300117	2.1261	0.0347271	0.999059	FALSE
IGHV3.48	HLA-DQA1.W48L_A	0.300117	2.1261	0.0347271	0.999059	FALSE
IGHV3.48	HLA-DQA1.Y80S_A	0.300117	2.1261	0.0347271	0.999059	FALSE
IGHV7.4.1	HLA-DQB1.R55P_T	0.0723442	2.12373	0.0349273	0.999059	FALSE
IGHV2.26	HLA-B.L-22R_A	0.0243456	2.12255	0.0350276	0.999059	FALSE
IGHV2.26	HLA-B.M-20T_A	0.0243456	2.12255	0.0350276	0.999059	FALSE
IGHV3.21	HLA-C.L156L_A	-0.28663	-2.12017	0.0352301	0.999059	FALSE
IGHV3.72	HLA-A.I95L_T	0.00290167	2.11692	0.035509	0.999059	FALSE
IGHV3.53	HLA-B.S97R_A	-0.184195	-2.11675	0.0355233	0.999059	FALSE
IGHV3.NL1	HLA-DQA1.D2G_T	0.510547	2.11666	0.035531	0.999059	FALSE
IGHV3.NL1	HLA-DQA1.V-6M_T	0.510547	2.11666	0.035531	0.999059	FALSE
IGHV3.23	HLA-C.V304M_T	0.530868	2.11604	0.0355844	0.999059	FALSE
IGHV3.23	HLA-C.V304V_A	0.530868	2.11604	0.0355844	0.999059	FALSE
IGHV3.74	HLA-C.A152T_T	0.272733	2.11592	0.0355947	0.999059	FALSE
IGHV3.74	HLA-C.E275G_T	0.272733	2.11592	0.0355947	0.999059	FALSE
IGHV3.74	HLA-C.R35Q_T	0.272733	2.11592	0.0355947	0.999059	FALSE
IGHV3.74	HLA-C.R35R_A	0.272733	2.11592	0.0355947	0.999059	FALSE
IGHV4.61	HLA-C.E177K_T	-0.0527886	-2.11485	0.0356873	0.999059	FALSE
IGHV3.NL1	HLA-DQA1.Q129H_A	0.351988	2.11439	0.0357266	0.999059	FALSE
IGHV1.69	HLA-A.Y99C_T	-0.210039	-2.11326	0.0358251	0.999059	FALSE
IGHV1.f	HLA-DQB1.E74E_A	0.00664007	2.11321	0.0358291	0.999059	FALSE
IGHV1.f	HLA-DQB1.L75V_T	0.00664007	2.11321	0.0358291	0.999059	FALSE
IGHV1.f	HLA-DQB1.T71T_A	0.00664007	2.11321	0.0358291	0.999059	FALSE
IGHV4.31	HLA-DQB1.D57S_T	-0.0013356	-2.11317	0.0358328	0.999059	FALSE
IGHV4.31	HLA-DQB1.Q126H_T	-0.0013356	-2.11317	0.0358328	0.999059	FALSE
IGHV4.30.2	HLA-DQA1.Q34E_T	0.031007	2.11107	0.0360149	0.999059	FALSE
IGHV4.b	HLA-DRB1.F31I_T	0.0154245	2.10917	0.0361801	0.999059	FALSE
IGHV3.NL1	HLA-B.Y116Y_T	-0.352288	-2.10838	0.036249	0.999059	FALSE
IGHV4.34	HLA-A.I95L_T	0.0719496	2.10835	0.0362516	0.999059	FALSE
IGHV1.3	HLA-DQB1.R55R_T	-0.15227	-2.10753	0.036324	0.999059	FALSE
IGHV1.24	HLA-B.S24A_A	-0.0318763	-2.10659	0.0364067	0.999059	FALSE
IGHV4.30.2	HLA-C.L-14I_A	-0.0366988	-2.10652	0.0364125	0.999059	FALSE
IGHV3.74	HLA-B.T94I_T	0.211872	2.10595	0.0364625	0.999059	FALSE
IGHV3.74	HLA-B.T94T_A	0.211872	2.10595	0.0364625	0.999059	FALSE
IGHV3.21	HLA-C.R97W_T	-0.304086	-2.10175	0.0368333	0.999059	FALSE
IGHV4.30.2	HLA-DQB1.A38A_A	0.0334634	2.10166	0.0368417	0.999059	FALSE
IGHV4.30.2	HLA-DQB1.A38V_T	0.0334634	2.10166	0.0368417	0.999059	FALSE
IGHV4.61	HLA-C.S99F_T	0.062407	2.10118	0.0368842	0.999059	FALSE
IGHV3.30.3	HLA-B.Y116Y_T	-0.369107	-2.10114	0.0368873	0.999059	FALSE
IGHV3.30.3	HLA-DPB1.V205M_T	0.342126	2.10054	0.036941	0.999059	FALSE
IGHV1.18	HLA-DQA1.M-5T_T	0.135375	2.10036	0.036957	0.999059	FALSE
IGHV4.30.2	HLA-C.D9S_T	0.0624486	2.09986	0.037001	0.999059	FALSE
IGHV4.61	HLA-C.L156R_T	0.03664	2.09913	0.0370669	0.999059	FALSE
IGHV4.61	HLA-B.I66I_A	0.0440869	2.09882	0.0370938	0.999059	FALSE
IGHV4.30.2	HLA-C.A306V_A	-0.0400436	-2.09649	0.0373026	0.999059	FALSE
IGHV4.30.2	HLA-C.A-16T_A	-0.0400436	-2.09649	0.0373026	0.999059	FALSE
IGHV4.30.2	HLA-C.C326S_A	-0.0400436	-2.09649	0.0373026	0.999059	FALSE
IGHV4.30.2	HLA-C.G-8A_A	-0.0400436	-2.09649	0.0373026	0.999059	FALSE
IGHV4.30.2	HLA-C.M285V_A	-0.0400436	-2.09649	0.0373026	0.999059	FALSE
IGHV4.30.2	HLA-C.M307V_A	-0.0400436	-2.09649	0.0373026	0.999059	FALSE
IGHV4.30.2	HLA-C.T305A_A	-0.0400436	-2.09649	0.0373026	0.999059	FALSE
IGHV4.30.2	HLA-C.T339A_A	-0.0400436	-2.09649	0.0373026	0.999059	FALSE
IGHV4.30.2	HLA-C.V295A_A	-0.0400436	-2.09649	0.0373026	0.999059	FALSE
IGHV4.61	HLA-DQB1.F9Y_A	-0.0434497	-2.09623	0.0373259	0.999059	FALSE
IGHV1.24	HLA-A.I97M_T	0.0338392	2.09566	0.0373774	0.999059	FALSE
IGHV3.11	HLA-DRB1.A73G_T	-0.474579	-2.09546	0.037395	0.999059	FALSE
IGHV1.45	HLA-DRB1.A71K_T	0.0557566	2.09533	0.0374068	0.999059	FALSE
IGHV2.5	HLA-B.K178T_A	0.0348081	2.09311	0.0376068	0.999059	FALSE
IGHV3.21	HLA-B.Y9Y_A	0.329886	2.09045	0.0378474	0.999059	FALSE
IGHV3.21	HLA-A.I298F_T	0.45124	2.09009	0.0378803	0.999059	FALSE
IGHV3.21	HLA-A.M307R_T	0.45124	2.09009	0.0378803	0.999059	FALSE
IGHV3.21	HLA-A.S-10L_T	0.45124	2.09009	0.0378803	0.999059	FALSE
IGHV4.30.2	HLA-C.E275E_A	-0.041249	-2.08973	0.0379126	0.999059	FALSE
IGHV4.b	HLA-C.L156R_T	0.0125605	2.08873	0.0380041	0.999059	FALSE
IGHV3.d	HLA-A.I97M_T	0.0111162	2.08827	0.038046	0.999059	FALSE
IGHV4.4	HLA-B.S24S_T	0.0931862	2.08531	0.0383168	0.999059	FALSE
IGHV4.28	HLA-DQB1.D-20G_A	-0.0054941	-2.08443	0.0383976	0.999059	FALSE
IGHV4.28	HLA-DQB1.L-4P_A	-0.0054941	-2.08443	0.0383976	0.999059	FALSE
IGHV4.28	HLA-DQB1.L-3V_A	-0.0054941	-2.08443	0.0383976	0.999059	FALSE
IGHV4.28	HLA-DQB1.S-5S_T	-0.0054941	-2.08443	0.0383976	0.999059	FALSE
IGHV4.28	HLA-DQB1.V203I_A	-0.0054941	-2.08443	0.0383976	0.999059	FALSE
IGHV3.49	HLA-DQB1.A38A_A	0.00591699	2.08303	0.0385267	0.999059	FALSE
IGHV3.49	HLA-DQB1.A38V_T	0.00591699	2.08303	0.0385267	0.999059	FALSE
IGHV1.45	HLA-A.T73I_T	0.049973	2.08247	0.0385783	0.999059	FALSE
IGHV4.31	HLA-A.L156L_T	0.00100485	2.08032	0.0387769	0.999059	FALSE
IGHV3.33	HLA-DQA1.Y25F_T	-0.873935	-2.07801	0.038991	0.999059	FALSE
IGHV1.18	HLA-DRB1.Q70Q_T	-0.108308	-2.0772	0.039067	0.999059	FALSE
IGHV3.15	HLA-DRB1.Q70Q_T	-0.0107055	-2.07652	0.03913	0.999059	FALSE
IGHV3.48	HLA-DPB1.F35L_A	0.280357	2.07632	0.0391495	0.999059	FALSE
IGHV3.15	HLA-DRB1.F26L_T	0.0137011	2.07604	0.0391757	0.999059	FALSE
IGHV1.24	HLA-DRB1.K98E_T	-0.0338016	-2.07415	0.0393526	0.999059	FALSE
IGHV1.24	HLA-DRB1.S104A_T	-0.0338016	-2.07415	0.0393526	0.999059	FALSE
IGHV4.61	HLA-DRB1.H16H_A	-0.0418395	-2.07382	0.0393835	0.999059	FALSE
IGHV3.20	HLA-DRB1.I67L_T	-0.086728	-2.07353	0.0394108	0.999059	FALSE
IGHV1.58	HLA-C.S24A_A	-0.0193775	-2.07329	0.0394329	0.999059	FALSE
IGHV4.31	HLA-B.N63E_A	-0.00099663	-2.07284	0.0394753	0.999059	FALSE
IGHV1.18	HLA-DQB1.F9F_T	-0.166569	-2.07007	0.0397371	0.999059	FALSE
IGHV2.70	HLA-A.N127K_T	-0.0444878	-2.06906	0.0398322	0.999059	FALSE
IGHV1.18	HLA-C.L156W_T	0.178832	2.06664	0.0400631	0.999059	FALSE
IGHV1.24	HLA-B.Y116S_T	0.0329523	2.06604	0.04012	0.999059	FALSE
IGHV3.30	HLA-DQA1.M207V_A	-1.34168	-2.06545	0.0401764	0.999059	FALSE
IGHV1.18	HLA-DQB1.E66D_T	-0.115016	-2.06358	0.0403557	0.999059	FALSE
IGHV1.18	HLA-DQB1.V67I_T	-0.115016	-2.06358	0.0403557	0.999059	FALSE
IGHV3.7	HLA-B.S24A_A	0.192625	2.0629	0.04042	0.999059	FALSE
IGHV3.20	HLA-DRB1.W9E_A	0.077355	2.05794	0.0408995	0.999059	FALSE
IGHV1.3	HLA-DQB1.F87F_T	-0.191326	-2.05715	0.0409759	0.999059	FALSE
IGHV1.24	HLA-B.E45K_T	-0.0361711	-2.0557	0.041117	0.999059	FALSE
IGHV3.53	HLA-C.S99S_T	0.201312	2.05549	0.0411376	0.999059	FALSE
IGHV4.b	HLA-C.L156L_A	0.0115644	2.05533	0.041153	0.999059	FALSE
IGHV3.11	HLA-A.E152E_T	-0.447369	-2.05504	0.041181	0.999059	FALSE
IGHV1.69	HLA-C.L156L_A	-0.117839	-2.0546	0.0412244	0.999059	FALSE
IGHV2.5	HLA-C.L95L_A	-0.033038	-2.05423	0.0412602	0.999059	FALSE
IGHV4.34	HLA-A.F9S_T	0.0691201	2.05384	0.0412988	0.999059	FALSE
IGHV4.30.4	HLA-B.D74Y_A	0.00298015	2.05376	0.0413068	0.999059	FALSE
IGHV1.3	HLA-DQB1.A-16P_T	-0.219774	-2.05148	0.0415299	0.999059	FALSE
IGHV1.3	HLA-DQB1.F9L_T	-0.219774	-2.05148	0.0415299	0.999059	FALSE
IGHV1.3	HLA-DQB1.S197N_T	-0.219774	-2.05148	0.0415299	0.999059	FALSE
IGHV1.3	HLA-DQB1.S3P_T	-0.219774	-2.05148	0.0415299	0.999059	FALSE
IGHV1.3	HLA-DQB1.Y37D_T	-0.219774	-2.05148	0.0415299	0.999059	FALSE
IGHV3.48	HLA-DPB1.A55D_T	0.315543	2.05076	0.0416008	0.999059	FALSE
IGHV3.48	HLA-DPB1.A56E_T	0.315543	2.05076	0.0416008	0.999059	FALSE
IGHV4.34	HLA-DQB1.G125G_T	-0.065823	-2.05066	0.0416109	0.999059	FALSE
IGHV1.2	HLA-B.N63E_A	0.112655	2.04668	0.0420045	0.999059	FALSE
IGHV3.15	HLA-DRB1.Q96Q_T	-0.0124511	-2.04501	0.0421702	0.999059	FALSE
IGHV4.30.4	HLA-B.A69R_T	0.00401993	2.04479	0.0421919	0.999059	FALSE
IGHV4.30.4	HLA-B.E76V_T	0.00401993	2.04479	0.0421919	0.999059	FALSE
IGHV4.30.4	HLA-B.I66K_T	0.00401993	2.04479	0.0421919	0.999059	FALSE
IGHV4.b	HLA-B.D74Y_A	0.0125186	2.0444	0.0422311	0.999059	FALSE
IGHV3.7	HLA-A.P184A_T	-0.201179	-2.04385	0.0422856	0.999059	FALSE
IGHV3.49	HLA-B.D114D_T	0.00584776	2.04305	0.0423657	0.999059	FALSE
IGHV4.39	HLA-DPA1.K111R_A	0.211128	2.04261	0.0424096	0.999059	FALSE
IGHV4.39	HLA-DPA1.M31Q_A	0.211128	2.04261	0.0424096	0.999059	FALSE
IGHV4.b	HLA-DRB1.F31F_A	0.0141177	2.04063	0.0426079	0.999059	FALSE
IGHV4.b	HLA-DRB1.R13F_T	0.0141177	2.04063	0.0426079	0.999059	FALSE
IGHV3.64	HLA-DRB1.S37F_T	0.243524	2.04014	0.0426576	0.999059	FALSE
IGHV3.43	HLA-DQB1.L26L_T	0.24372	2.04001	0.0426707	0.999059	FALSE
IGHV3.15	HLA-C.S116Y_T	-0.00941897	-2.03957	0.0427147	0.999059	FALSE
IGHV1.f	HLA-B.L95I_T	0.00692738	2.03824	0.0428485	0.999059	FALSE
IGHV3.15	HLA-DQB1.S-5T_A	-0.0103188	-2.03814	0.0428594	0.999059	FALSE
IGHV3.20	HLA-DRB1.D57S_T	-0.11704	-2.03767	0.0429061	0.999059	FALSE
IGHV2.70	HLA-DPB1.M76V_T	-0.0766141	-2.03699	0.0429754	0.999059	FALSE
IGHV4.34	HLA-DQB1.F87F_T	-0.0692615	-2.03625	0.0430502	0.999059	FALSE
IGHV3.21	HLA-B.Y116S_T	-0.292096	-2.0336	0.0433198	0.999059	FALSE
IGHV4.30.4	HLA-DRB1.T-16A_A	0.00351328	2.03319	0.0433616	0.999059	FALSE
IGHV3.21	HLA-B.D114D_T	-0.291675	-2.03159	0.0435252	0.999059	FALSE
IGHV1.24	HLA-B.A69T_A	0.0333551	2.03131	0.043553	0.999059	FALSE
IGHV1.24	HLA-B.A71A_T	0.0333551	2.03131	0.043553	0.999059	FALSE
IGHV1.24	HLA-B.A71T_A	0.0333551	2.03131	0.043553	0.999059	FALSE
IGHV1.24	HLA-B.Q70N_A	0.0333551	2.03131	0.043553	0.999059	FALSE
IGHV3.21	HLA-C.S116S_T	0.287658	2.0308	0.043606	0.999059	FALSE
IGHV3.20	HLA-DRB1.D28D_A	0.0746911	2.03003	0.0436845	0.999059	FALSE
IGHV3.20	HLA-DRB1.Y30Y_A	0.0746911	2.03003	0.0436845	0.999059	FALSE
IGHV3.23	HLA-C.D9D_T	0.503168	2.02976	0.0437123	0.999059	FALSE
IGHV4.30.2	HLA-DQB1.D57D_A	0.0336079	2.02931	0.0437588	0.999059	FALSE
IGHV4.30.2	HLA-DQB1.F87F_T	-0.0409932	-2.02921	0.0437687	0.999059	FALSE
IGHV3.15	HLA-DRB1.L133R_A	-0.0125073	-2.02867	0.043824	0.999059	FALSE
IGHV3.15	HLA-DRB1.M142V_A	-0.0125073	-2.02867	0.043824	0.999059	FALSE
IGHV1.24	HLA-B.E163L_T	0.0302277	2.02843	0.0438486	0.999059	FALSE
IGHV3.48	HLA-DQA1.M207V_A	0.346818	2.02771	0.043923	0.999059	FALSE
IGHV4.61	HLA-A.L156W_T	-0.056269	-2.0276	0.0439345	0.999059	FALSE
IGHV1.18	HLA-C.A306V_A	-0.121883	-2.02714	0.0439822	0.999059	FALSE
IGHV1.18	HLA-C.A-16T_A	-0.121883	-2.02714	0.0439822	0.999059	FALSE
IGHV1.18	HLA-C.C326S_A	-0.121883	-2.02714	0.0439822	0.999059	FALSE
IGHV1.18	HLA-C.G-8A_A	-0.121883	-2.02714	0.0439822	0.999059	FALSE
IGHV1.18	HLA-C.M285V_A	-0.121883	-2.02714	0.0439822	0.999059	FALSE
IGHV1.18	HLA-C.M307V_A	-0.121883	-2.02714	0.0439822	0.999059	FALSE
IGHV1.18	HLA-C.T305A_A	-0.121883	-2.02714	0.0439822	0.999059	FALSE
IGHV1.18	HLA-C.T339A_A	-0.121883	-2.02714	0.0439822	0.999059	FALSE
IGHV1.18	HLA-C.V295A_A	-0.121883	-2.02714	0.0439822	0.999059	FALSE
IGHV3.d	HLA-DQB1.G70E_T	-0.0227281	-2.02712	0.0439842	0.999059	FALSE
IGHV3.d	HLA-DQB1.P56L_T	-0.0227281	-2.02712	0.0439842	0.999059	FALSE
IGHV3.d	HLA-DQB1.T71D_T	-0.0227281	-2.02712	0.0439842	0.999059	FALSE
IGHV3.7	HLA-A.I142T_T	-0.208029	-2.0244	0.0442657	0.999059	FALSE
IGHV3.7	HLA-A.R145H_T	-0.208029	-2.0244	0.0442657	0.999059	FALSE
IGHV3.49	HLA-DQB1.Y30Y_A	0.00617377	2.0234	0.0443694	0.999059	FALSE
IGHV1.24	HLA-B.K178T_A	-0.0377396	-2.02128	0.04459	0.999059	FALSE
IGHV3.72	HLA-A.I282V_T	0.00280016	2.02072	0.0446493	0.999059	FALSE
IGHV3.72	HLA-A.K311N_T	0.00280016	2.02072	0.0446493	0.999059	FALSE
IGHV3.72	HLA-A.Q62E_T	0.00280016	2.02072	0.0446493	0.999059	FALSE
IGHV3.72	HLA-A.R65G_T	0.00280016	2.02072	0.0446493	0.999059	FALSE
IGHV3.72	HLA-A.Y99F_T	0.00280016	2.02072	0.0446493	0.999059	FALSE
IGHV4.b	HLA-DRB1.A140T_A	0.0118213	2.02049	0.0446731	0.999059	FALSE
IGHV3.43	HLA-C.T163T_A	-0.262498	-2.02013	0.0447106	0.999059	FALSE
IGHV1.24	HLA-B.T143S_T	-0.0393896	-2.01922	0.0448063	0.999059	FALSE
IGHV1.24	HLA-B.W147L_T	-0.0393896	-2.01922	0.0448063	0.999059	FALSE
IGHV4.30.2	HLA-B.I66I_A	0.0392718	2.01766	0.0449701	0.999059	FALSE
IGHV1.f	HLA-B.D177E_A	-0.00705795	-2.01605	0.0451389	0.999059	FALSE
IGHV1.f	HLA-B.E180Q_A	-0.00705795	-2.01605	0.0451389	0.999059	FALSE
IGHV3.43	HLA-C.R97W_T	0.245922	2.01328	0.045432	0.999059	FALSE
IGHV4.30.2	HLA-C.D114N_T	-0.0396395	-2.01091	0.0456848	0.999059	FALSE
IGHV3.33	HLA-DRB1.Q70D_T	-0.703439	-2.0106	0.0457178	0.999059	FALSE
IGHV3.66	HLA-DQB1.D57S_T	0.129845	2.00881	0.0459088	0.999059	FALSE
IGHV3.66	HLA-DQB1.Q126H_T	0.129845	2.00881	0.0459088	0.999059	FALSE
IGHV7.4.1	HLA-DQA1.S52R_A	-0.0659704	-2.0087	0.0459209	0.999059	FALSE
IGHV4.30.2	HLA-B.D177E_A	-0.0370943	-2.00817	0.0459774	0.999059	FALSE
IGHV4.30.2	HLA-B.E180Q_A	-0.0370943	-2.00817	0.0459774	0.999059	FALSE
IGHV4.61	HLA-C.A152T_T	-0.0504433	-2.00742	0.0460581	0.999059	FALSE
IGHV4.61	HLA-C.E275G_T	-0.0504433	-2.00742	0.0460581	0.999059	FALSE
IGHV4.61	HLA-C.R35Q_T	-0.0504433	-2.00742	0.0460581	0.999059	FALSE
IGHV4.61	HLA-C.R35R_A	-0.0504433	-2.00742	0.0460581	0.999059	FALSE
IGHV3.21	HLA-B.E45M_T	-0.278326	-2.00691	0.0461126	0.999059	FALSE
IGHV3.21	HLA-B.E46A_T	-0.278326	-2.00691	0.0461126	0.999059	FALSE
IGHV3.53	HLA-B.A158T_T	0.28442	2.00546	0.0462682	0.999059	FALSE
IGHV3.53	HLA-DPA1.K111R_A	0.162904	2.00459	0.0463625	0.999059	FALSE
IGHV3.53	HLA-DPA1.M31Q_A	0.162904	2.00459	0.0463625	0.999059	FALSE
IGHV1.24	HLA-C.D9D_T	-0.0356112	-2.0025	0.0465886	0.999059	FALSE
IGHV1.69	HLA-B.Y67Y_T	-0.13091	-2.00104	0.0467467	0.999059	FALSE
IGHV3.NL1	HLA-DPB1.A36V_A	-0.387991	-2.00066	0.0467884	0.999059	FALSE
IGHV3.NL1	HLA-DPB1.A55A_T	-0.387991	-2.00066	0.0467884	0.999059	FALSE
IGHV4.30.2	HLA-DQB1.F87Y_T	0.0353193	1.99973	0.046889	0.999059	FALSE
IGHV1.24	HLA-B.V282I_A	-0.0300281	-1.99923	0.0469438	0.999059	FALSE
IGHV3.74	HLA-B.L95I_T	0.198863	1.99879	0.0469916	0.999059	FALSE
IGHV3.d	HLA-DQB1.E74S_T	-0.0110389	-1.99764	0.0471181	0.999059	FALSE
IGHV3.d	HLA-DQB1.L26G_T	-0.0110389	-1.99764	0.0471181	0.999059	FALSE
IGHV3.33	HLA-C.V304M_T	-0.788906	-1.99757	0.0471257	0.999059	FALSE
IGHV3.33	HLA-C.V304V_A	-0.788906	-1.99757	0.0471257	0.999059	FALSE
IGHV3.23	HLA-C.E177K_T	0.639974	1.99627	0.0472681	0.999059	FALSE
IGHV4.59	HLA-DRB1.I67I_T	-0.0684654	-1.99577	0.0473225	0.999059	FALSE
IGHV3.15	HLA-DQB1.A86E_A	-0.00976151	-1.99576	0.0473234	0.999059	FALSE
IGHV3.15	HLA-DQB1.E84Q_A	-0.00976151	-1.99576	0.0473234	0.999059	FALSE
IGHV3.15	HLA-DQB1.F87L_A	-0.00976151	-1.99576	0.0473234	0.999059	FALSE
IGHV3.15	HLA-DQB1.G89T_A	-0.00976151	-1.99576	0.0473234	0.999059	FALSE
IGHV3.15	HLA-DQB1.G125A_A	-0.00976151	-1.99576	0.0473234	0.999059	FALSE
IGHV3.15	HLA-DQB1.I90T_A	-0.00976151	-1.99576	0.0473234	0.999059	FALSE
IGHV3.15	HLA-DQB1.Q221H_A	-0.00976151	-1.99576	0.0473234	0.999059	FALSE
IGHV3.15	HLA-DQB1.Q53L_A	-0.00976151	-1.99576	0.0473234	0.999059	FALSE
IGHV3.15	HLA-DQB1.R220H_A	-0.00976151	-1.99576	0.0473234	0.999059	FALSE
IGHV3.15	HLA-DQB1.V85L_A	-0.00976151	-1.99576	0.0473234	0.999059	FALSE
IGHV1.3	HLA-A.F9S_T	0.183777	1.99554	0.0473476	0.999059	FALSE
IGHV2.26	HLA-B.S24S_T	0.0226957	1.9949	0.0474188	0.999059	FALSE
IGHV3.13	HLA-B.S97S_T	-0.178637	-1.99455	0.0474568	0.999059	FALSE
IGHV3.7	HLA-B.H113Y_T	-0.298446	-1.99448	0.047465	0.999059	FALSE
IGHV2.26	HLA-B.V-15L_T	0.0174021	1.99363	0.0475578	0.999059	FALSE
IGHV3.66	HLA-DPB1.K69E_T	-0.0959635	-1.99358	0.0475634	0.999059	FALSE
IGHV3.66	HLA-C.E177K_T	-0.14131	-1.99246	0.0476878	0.999059	FALSE
IGHV1.3	HLA-A.I97M_T	0.149211	1.99181	0.0477588	0.999059	FALSE
IGHV4.61	HLA-C.A306V_A	-0.0411063	-1.99043	0.0479119	0.999059	FALSE
IGHV4.61	HLA-C.A-16T_A	-0.0411063	-1.99043	0.0479119	0.999059	FALSE
IGHV4.61	HLA-C.C326S_A	-0.0411063	-1.99043	0.0479119	0.999059	FALSE
IGHV4.61	HLA-C.G-8A_A	-0.0411063	-1.99043	0.0479119	0.999059	FALSE
IGHV4.61	HLA-C.M285V_A	-0.0411063	-1.99043	0.0479119	0.999059	FALSE
IGHV4.61	HLA-C.M307V_A	-0.0411063	-1.99043	0.0479119	0.999059	FALSE
IGHV4.61	HLA-C.T305A_A	-0.0411063	-1.99043	0.0479119	0.999059	FALSE
IGHV4.61	HLA-C.T339A_A	-0.0411063	-1.99043	0.0479119	0.999059	FALSE
IGHV4.61	HLA-C.V295A_A	-0.0411063	-1.99043	0.0479119	0.999059	FALSE
IGHV1.18	HLA-DQB1.A86A_T	-0.102171	-1.99006	0.047953	0.999059	FALSE
IGHV4.61	HLA-C.R219W_A	-0.0332604	-1.99004	0.0479554	0.999059	FALSE
IGHV3.13	HLA-DQA1.A69L_T	0.0918239	1.98998	0.047962	0.999059	FALSE
IGHV3.13	HLA-DQA1.L-15M_T	0.0918239	1.98998	0.047962	0.999059	FALSE
IGHV3.48	HLA-DQA1.E50L_T	-0.293385	-1.98946	0.04802	0.999059	FALSE
IGHV3.48	HLA-DQA1.F215L_T	-0.293385	-1.98946	0.04802	0.999059	FALSE
IGHV3.48	HLA-DQA1.K53R_T	-0.293385	-1.98946	0.04802	0.999059	FALSE
IGHV3.72	HLA-A.G79R_T	0.00274767	1.98899	0.0480721	0.999059	FALSE
IGHV3.72	HLA-A.G83R_T	0.00274767	1.98899	0.0480721	0.999059	FALSE
IGHV3.72	HLA-A.L81A_T	0.00274767	1.98899	0.0480721	0.999059	FALSE
IGHV3.72	HLA-A.R82L_T	0.00274767	1.98899	0.0480721	0.999059	FALSE
IGHV3.72	HLA-A.T80I_T	0.00274767	1.98899	0.0480721	0.999059	FALSE
IGHV3.72	HLA-A.V76E_T	0.00274767	1.98899	0.0480721	0.999059	FALSE
IGHV3.74	HLA-DRB1.A74A_A	-0.174383	-1.98828	0.0481518	0.999059	FALSE
IGHV2.70	HLA-B.N63E_A	0.0417463	1.98736	0.0482545	0.999059	FALSE
IGHV3.43	HLA-DPB1.F35L_A	0.224387	1.98723	0.0482681	0.999059	FALSE
IGHV4.61	HLA-B.R156L_A	0.03704	1.98684	0.0483117	0.999059	FALSE
IGHV2.26	HLA-B.E163L_T	-0.0151049	-1.98672	0.0483259	0.999059	FALSE
IGHV1.f	HLA-B.G83R_T	0.00622308	1.98651	0.0483488	0.999059	FALSE
IGHV1.f	HLA-B.N80N_A	0.00622308	1.98651	0.0483488	0.999059	FALSE
IGHV1.f	HLA-B.R82L_T	0.00622308	1.98651	0.0483488	0.999059	FALSE
IGHV1.f	HLA-DRB1.I67L_T	0.00656292	1.98469	0.0485527	0.999059	FALSE
IGHV3.20	HLA-DRB1.I67F_T	0.077103	1.98374	0.0486592	0.999059	FALSE
IGHV3.20	HLA-DQB1.R55P_T	0.0776598	1.98281	0.0487639	0.999059	FALSE
IGHV4.28	HLA-DQB1.G70E_T	0.0107552	1.98263	0.048785	0.999059	FALSE
IGHV4.28	HLA-DQB1.P56L_T	0.0107552	1.98263	0.048785	0.999059	FALSE
IGHV4.28	HLA-DQB1.T71D_T	0.0107552	1.98263	0.048785	0.999059	FALSE
IGHV3.NL1	HLA-DPB1.M76M_A	-0.361084	-1.98241	0.0488092	0.999059	FALSE
IGHV1.24	HLA-DQB1.G13A_T	0.0318486	1.98211	0.0488433	0.999059	FALSE
IGHV1.24	HLA-DQB1.L26Y_T	0.0318486	1.98211	0.0488433	0.999059	FALSE
IGHV1.24	HLA-DQB1.R167H_T	0.0318486	1.98211	0.0488433	0.999059	FALSE
IGHV3.53	HLA-B.Y67C_T	0.263137	1.98155	0.0489066	0.999059	FALSE
IGHV3.64	HLA-DRB1.S37S_T	-0.16022	-1.981	0.0489687	0.999059	FALSE
IGHV4.30.2	HLA-C.S116F_T	-0.0380919	-1.98036	0.0490405	0.999059	FALSE
IGHV4.34	HLA-DQB1.D57D_A	0.0552002	1.97843	0.0492593	0.999059	FALSE
IGHV3.21	HLA-B.E45K_T	0.313592	1.97814	0.0492933	0.999059	FALSE
IGHV4.b	HLA-DQB1.F9F_T	-0.0188242	-1.97604	0.0495325	0.999059	FALSE
IGHV5.51	HLA-DPB1.A55E_A	0.0701114	1.97547	0.0495965	0.999059	FALSE
IGHV2.70	HLA-A.I95V_T	-0.0432172	-1.97418	0.0497446	0.999059	FALSE
IGHV3.21	HLA-DQB1.E74E_A	-0.293036	-1.97317	0.0498606	0.999059	FALSE
IGHV3.21	HLA-DQB1.L75V_T	-0.293036	-1.97317	0.0498606	0.999059	FALSE
IGHV3.21	HLA-DQB1.T71T_A	-0.293036	-1.97317	0.0498606	0.999059	FALSE
IGHV3.NL1	HLA-C.C1G_T	0.335348	1.97305	0.0498744	0.999059	FALSE
IGHV1.24	HLA-DQA1.A187A_A	-0.0338346	-1.97243	0.0499453	0.999059	FALSE
IGHV1.24	HLA-DQA1.A187T_T	-0.0338346	-1.97243	0.0499453	0.999059	FALSE
IGHV1.24	HLA-DQA1.G56R_T	-0.0338346	-1.97243	0.0499453	0.999059	FALSE
IGHV1.24	HLA-DQA1.M76V_T	-0.0338346	-1.97243	0.0499453	0.999059	FALSE
IGHV1.24	HLA-DQA1.R47Q_T	-0.0338346	-1.97243	0.0499453	0.999059	FALSE
IGHV1.24	HLA-DQA1.T26S_T	-0.0338346	-1.97243	0.0499453	0.999059	FALSE
IGHV1.24	HLA-B.A305T_A	-0.0298906	-1.97195	0.0500013	0.999059	FALSE
IGHV4.30.2	HLA-C.A152A_T	-0.03778	-1.97002	0.0502233	0.999059	FALSE
IGHV4.30.2	HLA-C.L147W_A	-0.03778	-1.97002	0.0502233	0.999059	FALSE
IGHV4.30.2	HLA-C.L194V_A	-0.03778	-1.97002	0.0502233	0.999059	FALSE
IGHV4.30.2	HLA-C.M261V_A	-0.03778	-1.97002	0.0502233	0.999059	FALSE
IGHV4.30.2	HLA-C.P184H_A	-0.03778	-1.97002	0.0502233	0.999059	FALSE
IGHV4.30.2	HLA-C.Q253E_A	-0.03778	-1.97002	0.0502233	0.999059	FALSE
IGHV4.30.2	HLA-C.Q267P_A	-0.03778	-1.97002	0.0502233	0.999059	FALSE
IGHV4.30.2	HLA-C.S273R_A	-0.03778	-1.97002	0.0502233	0.999059	FALSE
IGHV2.26	HLA-C.A152E_A	-0.0164437	-1.96963	0.0502682	0.999059	FALSE
IGHV3.15	HLA-DQB1.A-9S_T	0.0166974	1.96856	0.0503926	0.999059	FALSE
IGHV3.15	HLA-DQB1.E74A_T	0.0166974	1.96856	0.0503926	0.999059	FALSE
IGHV3.15	HLA-DQB1.P52L_T	0.0166974	1.96856	0.0503926	0.999059	FALSE
IGHV3.15	HLA-DQB1.R55L_T	0.0166974	1.96856	0.0503926	0.999059	FALSE
IGHV3.15	HLA-DQB1.T71K_T	0.0166974	1.96856	0.0503926	0.999059	FALSE
IGHV3.15	HLA-DQB1.T28S_T	0.0166974	1.96856	0.0503926	0.999059	FALSE
IGHV3.15	HLA-DQB1.V46E_T	0.0166974	1.96856	0.0503926	0.999059	FALSE
IGHV3.15	HLA-DQB1.Y30S_T	0.0166974	1.96856	0.0503926	0.999059	FALSE
IGHV3.15	HLA-DQB1.Y37I_T	0.0166974	1.96856	0.0503926	0.999059	FALSE
IGHV3.15	HLA-DQB1.Y47F_T	0.0166974	1.96856	0.0503926	0.999059	FALSE
IGHV3.15	HLA-DQB1.Y47Y_A	0.0166974	1.96856	0.0503926	0.999059	FALSE
IGHV1.3	HLA-B.Y116S_T	0.145648	1.96852	0.050397	0.999059	FALSE
IGHV3.48	HLA-A.F9S_T	-0.355228	-1.96624	0.0506612	0.999059	FALSE
IGHV3.53	HLA-B.Y116F_T	0.261101	1.96592	0.0506983	0.999059	FALSE
IGHV3.20	HLA-DQB1.G70G_T	-0.0827794	-1.96518	0.0507853	0.999059	FALSE
IGHV3.21	HLA-A.E63E_A	0.4025	1.96487	0.0508212	0.999059	FALSE
IGHV1.18	HLA-DQB1.A140A_A	0.0978845	1.96453	0.0508607	0.999059	FALSE
IGHV1.18	HLA-DQB1.A140T_T	0.0978845	1.96453	0.0508607	0.999059	FALSE
IGHV1.18	HLA-DQB1.S182N_T	0.0978845	1.96453	0.0508607	0.999059	FALSE
IGHV3.21	HLA-C.S99S_T	0.33754	1.96444	0.0508708	0.999059	FALSE
IGHV1.46	HLA-DRB1.A74A_A	-0.0437215	-1.96431	0.0508864	0.999059	FALSE
IGHV1.45	HLA-DRB1.A74L_T	0.0511594	1.96416	0.0509045	0.999059	FALSE
IGHV1.45	HLA-DRB1.R189S_T	0.0511594	1.96416	0.0509045	0.999059	FALSE
IGHV3.48	HLA-DPA1.F160V_A	0.279761	1.96337	0.0509958	0.999059	FALSE
IGHV3.48	HLA-DPA1.L127P_A	0.279761	1.96337	0.0509958	0.999059	FALSE
IGHV3.48	HLA-DPA1.Q50R_A	0.279761	1.96337	0.0509958	0.999059	FALSE
IGHV3.48	HLA-DPA1.T83A_A	0.279761	1.96337	0.0509958	0.999059	FALSE
IGHV3.48	HLA-DPA1.T228P_A	0.279761	1.96337	0.0509958	0.999059	FALSE
IGHV4.28	HLA-B.E163T_T	0.00618745	1.96256	0.0510908	0.999059	FALSE
IGHV4.b	HLA-B.E45M_T	0.011319	1.96151	0.0512145	0.999059	FALSE
IGHV4.b	HLA-B.E46A_T	0.011319	1.96151	0.0512145	0.999059	FALSE
IGHV3.49	HLA-A.E63E_A	0.00801147	1.96141	0.0512254	0.999059	FALSE
IGHV2.26	HLA-B.Y67C_T	0.0258466	1.95979	0.0514166	0.999059	FALSE
IGHV3.21	HLA-DQA1.Q129H_A	-0.294023	-1.95702	0.0517434	0.999059	FALSE
IGHV3.21	HLA-A.D116Y_T	-0.286507	-1.95688	0.0517605	0.999059	FALSE
IGHV3.21	HLA-A.I95I_A	-0.286507	-1.95688	0.0517605	0.999059	FALSE
IGHV3.21	HLA-A.N66K_T	-0.286507	-1.95688	0.0517605	0.999059	FALSE
IGHV3.21	HLA-A.R114H_T	-0.286507	-1.95688	0.0517605	0.999059	FALSE
IGHV4.39	HLA-DPB1.F35L_A	0.190167	1.95645	0.0518117	0.999059	FALSE
IGHV3.15	HLA-DQB1.A86A_T	-0.00993381	-1.95626	0.0518339	0.999059	FALSE
IGHV3.30.3	HLA-C.C1G_T	0.349503	1.9557	0.0518999	0.999059	FALSE
IGHV7.4.1	HLA-B.Y116F_T	-0.106354	-1.95525	0.051954	0.999059	FALSE
IGHV3.33	HLA-DRB1.D28E_T	-0.833571	-1.95505	0.0519776	0.999059	FALSE
IGHV2.5	HLA-C.L95I_T	-0.0319266	-1.95495	0.05199	0.999059	FALSE
IGHV3.23	HLA-B.A-9G_A	0.452971	1.95463	0.052027	0.999059	FALSE
IGHV2.70	HLA-C.S99Y_A	-0.0388746	-1.95426	0.052071	0.999059	FALSE
IGHV4.30.2	HLA-B.E152V_A	0.0285136	1.95306	0.0522148	0.999059	FALSE
IGHV3.74	HLA-B.H113Y_T	0.264548	1.95292	0.0522312	0.999059	FALSE
IGHV1.45	HLA-A.E63N_T	0.0431439	1.95183	0.0523622	0.999059	FALSE
IGHV1.45	HLA-A.Q62R_T	0.0431439	1.95183	0.0523622	0.999059	FALSE
IGHV1.f	HLA-B.E45T_T	0.00779377	1.95159	0.0523901	0.999059	FALSE
IGHV3.23	HLA-C.A152T_T	0.629135	1.95063	0.0525048	0.999059	FALSE
IGHV3.23	HLA-C.E275G_T	0.629135	1.95063	0.0525048	0.999059	FALSE
IGHV3.23	HLA-C.R35Q_T	0.629135	1.95063	0.0525048	0.999059	FALSE
IGHV3.23	HLA-C.R35R_A	0.629135	1.95063	0.0525048	0.999059	FALSE
IGHV3.74	HLA-C.E177K_T	0.250435	1.95061	0.0525077	0.999059	FALSE
IGHV3.43	HLA-DPB1.F9F_A	0.257596	1.94913	0.0526857	0.999059	FALSE
IGHV3.43	HLA-DPB1.G11L_T	0.257596	1.94913	0.0526857	0.999059	FALSE
IGHV3.43	HLA-DPB1.L8V_T	0.257596	1.94913	0.0526857	0.999059	FALSE
IGHV3.NL1	HLA-DQA1.R41K_T	-0.556287	-1.94843	0.0527694	0.999059	FALSE
IGHV3.NL1	HLA-DQA1.S130A_T	-0.556287	-1.94843	0.0527694	0.999059	FALSE
IGHV4.30.2	HLA-DRB1.S37F_T	0.0543004	1.94834	0.0527804	0.999059	FALSE
IGHV3.66	HLA-DPB1.M76V_T	0.171623	1.94803	0.0528178	0.999059	FALSE
IGHV3.7	HLA-A.I95V_T	-0.199613	-1.94794	0.0528287	0.999059	FALSE
IGHV3.15	HLA-DQA1.Y25F_T	0.0117105	1.94781	0.0528438	0.999059	FALSE
IGHV3.21	HLA-DQB1.G70R_A	-0.286967	-1.94739	0.0528952	0.999059	FALSE
IGHV3.33	HLA-B.A158T_T	1.17824	1.94514	0.0531667	0.999059	FALSE
IGHV1.2	HLA-A.H151R_T	-0.15217	-1.94479	0.0532098	0.999059	FALSE
IGHV1.2	HLA-B.V103L_T	-0.117246	-1.94468	0.0532226	0.999059	FALSE
IGHV3.43	HLA-C.D9S_T	0.437034	1.94449	0.0532459	0.999059	FALSE
IGHV3.30.3	HLA-B.S97R_A	-0.346517	-1.94386	0.0533218	0.999059	FALSE
IGHV3.15	HLA-DQB1.L-4L_T	-0.0164541	-1.94202	0.0535459	0.999059	FALSE
IGHV3.33	HLA-C.R97W_T	-0.685307	-1.94195	0.0535546	0.999059	FALSE
IGHV7.4.1	HLA-B.A158T_T	-0.112841	-1.94172	0.0535825	0.999059	FALSE
IGHV3.15	HLA-DQB1.F9F_T	-0.0154645	-1.94129	0.0536359	0.999059	FALSE
IGHV3.21	HLA-A.T73I_T	0.455004	1.94074	0.0537021	0.999059	FALSE
IGHV3.23	HLA-B.S24S_T	0.60382	1.94017	0.0537727	0.999059	FALSE
IGHV4.4	HLA-B.Y116S_T	-0.0620706	-1.93858	0.053967	0.999059	FALSE
IGHV2.70	HLA-DPB1.I65L_T	-0.0755407	-1.93847	0.0539799	0.999059	FALSE
IGHV3.d	HLA-DQB1.G70R_A	-0.010457	-1.93787	0.0540548	0.999059	FALSE
IGHV3.d	HLA-B.S97R_A	0.0108399	1.93745	0.0541055	0.999059	FALSE
IGHV1.24	HLA-DRB1.T181M_T	-0.0338608	-1.93686	0.0541781	0.999059	FALSE
IGHV1.24	HLA-DRB1.T181T_A	-0.0338608	-1.93686	0.0541781	0.999059	FALSE
IGHV1.69	HLA-A.E253Q_T	-0.114817	-1.9362	0.0542597	0.999059	FALSE
IGHV1.69	HLA-A.G207S_T	-0.114817	-1.9362	0.0542597	0.999059	FALSE
IGHV1.69	HLA-A.I194V_T	-0.114817	-1.9362	0.0542597	0.999059	FALSE
IGHV1.69	HLA-A.L294F_T	-0.114817	-1.9362	0.0542597	0.999059	FALSE
IGHV1.69	HLA-A.P193A_T	-0.114817	-1.9362	0.0542597	0.999059	FALSE
IGHV4.b	HLA-C.L-14I_A	-0.0125649	-1.93515	0.0543893	0.999059	FALSE
IGHV4.39	HLA-DPA1.F160V_A	0.198289	1.93492	0.0544178	0.999059	FALSE
IGHV4.39	HLA-DPA1.L127P_A	0.198289	1.93492	0.0544178	0.999059	FALSE
IGHV4.39	HLA-DPA1.Q50R_A	0.198289	1.93492	0.0544178	0.999059	FALSE
IGHV4.39	HLA-DPA1.T83A_A	0.198289	1.93492	0.0544178	0.999059	FALSE
IGHV4.39	HLA-DPA1.T228P_A	0.198289	1.93492	0.0544178	0.999059	FALSE
IGHV3.43	HLA-DQB1.R55R_T	-0.229193	-1.9326	0.0547046	0.999059	FALSE
IGHV3.15	HLA-DQB1.G70R_A	-0.0099008	-1.93219	0.0547564	0.999059	FALSE
IGHV1.f	HLA-B.K178T_A	-0.00688476	-1.93144	0.0548489	0.999059	FALSE
IGHV7.4.1	HLA-DQB1.A140A_A	0.0639149	1.93007	0.0550195	0.999059	FALSE
IGHV7.4.1	HLA-DQB1.A140T_T	0.0639149	1.93007	0.0550195	0.999059	FALSE
IGHV7.4.1	HLA-DQB1.S182N_T	0.0639149	1.93007	0.0550195	0.999059	FALSE
IGHV3.48	HLA-DQB1.R55R_T	0.273744	1.92847	0.055219	0.999059	FALSE
IGHV1.69	HLA-B.Q70Q_T	-0.12803	-1.9284	0.0552287	0.999059	FALSE
IGHV5.a	HLA-DPA1.F160V_A	0.00093744	1.92737	0.055358	0.999059	FALSE
IGHV5.a	HLA-DPA1.L127P_A	0.00093744	1.92737	0.055358	0.999059	FALSE
IGHV5.a	HLA-DPA1.Q50R_A	0.00093744	1.92737	0.055358	0.999059	FALSE
IGHV5.a	HLA-DPA1.T83A_A	0.00093744	1.92737	0.055358	0.999059	FALSE
IGHV5.a	HLA-DPA1.T228P_A	0.00093744	1.92737	0.055358	0.999059	FALSE
IGHV4.30.2	HLA-C.S99S_T	-0.0370171	-1.92653	0.0554623	0.999059	FALSE
IGHV2.5	HLA-DQA1.D161E_T	0.0380785	1.92612	0.055514	0.999059	FALSE
IGHV2.5	HLA-DQA1.F156L_T	0.0380785	1.92612	0.055514	0.999059	FALSE
IGHV2.5	HLA-DQA1.I163S_T	0.0380785	1.92612	0.055514	0.999059	FALSE
IGHV2.5	HLA-DQA1.I75S_T	0.0380785	1.92612	0.055514	0.999059	FALSE
IGHV2.5	HLA-DQA1.Q175K_T	0.0380785	1.92612	0.055514	0.999059	FALSE
IGHV2.5	HLA-DQA1.T107I_T	0.0380785	1.92612	0.055514	0.999059	FALSE
IGHV3.49	HLA-A.A246S_T	0.00749774	1.92574	0.0555626	0.999059	FALSE
IGHV3.49	HLA-A.T299A_T	0.00749774	1.92574	0.0555626	0.999059	FALSE
IGHV3.49	HLA-A.V334M_T	0.00749774	1.92574	0.0555626	0.999059	FALSE
IGHV4.34	HLA-DPB1.A55E_A	0.0488269	1.9253	0.0556175	0.999059	FALSE
IGHV3.d	HLA-A.E63E_A	0.0144462	1.92527	0.0556212	0.999059	FALSE
IGHV3.23	HLA-B.L-22R_A	0.604911	1.92513	0.0556389	0.999059	FALSE
IGHV3.23	HLA-B.M-20T_A	0.604911	1.92513	0.0556389	0.999059	FALSE
IGHV3.11	HLA-B.T94I_T	-0.314494	-1.92483	0.0556763	0.999059	FALSE
IGHV3.11	HLA-B.T94T_A	-0.314494	-1.92483	0.0556763	0.999059	FALSE
IGHV3.13	HLA-A.I97I_T	-0.0956675	-1.92372	0.0558161	0.999059	FALSE
IGHV3.13	HLA-A.L276P_A	-0.0956675	-1.92372	0.0558161	0.999059	FALSE
IGHV3.13	HLA-A.T321S_A	-0.0956675	-1.92372	0.0558161	0.999059	FALSE
IGHV4.4	HLA-B.D114D_T	-0.0615672	-1.92349	0.0558451	0.999059	FALSE
IGHV3.15	HLA-DRB1.P11P_T	-0.0118633	-1.92317	0.055886	0.999059	FALSE
IGHV3.15	HLA-DRB1.R13R_T	-0.0118633	-1.92317	0.055886	0.999059	FALSE
IGHV4.61	HLA-DPA1.F160V_A	0.0327747	1.92261	0.055957	0.999059	FALSE
IGHV4.61	HLA-DPA1.L127P_A	0.0327747	1.92261	0.055957	0.999059	FALSE
IGHV4.61	HLA-DPA1.Q50R_A	0.0327747	1.92261	0.055957	0.999059	FALSE
IGHV4.61	HLA-DPA1.T83A_A	0.0327747	1.92261	0.055957	0.999059	FALSE
IGHV4.61	HLA-DPA1.T228P_A	0.0327747	1.92261	0.055957	0.999059	FALSE
IGHV3.23	HLA-C.D90A_A	0.447567	1.92064	0.0562062	0.999059	FALSE
IGHV4.61	HLA-B.Y67Y_T	0.0358102	1.92058	0.0562138	0.999059	FALSE
IGHV5.51	HLA-DPB1.F35L_A	0.067733	1.91867	0.0564574	0.999059	FALSE
IGHV4.61	HLA-DQB1.L-4L_T	-0.0564416	-1.91788	0.0565584	0.999059	FALSE
IGHV1.24	HLA-B.C325C_T	-0.0294825	-1.91754	0.0566008	0.999059	FALSE
IGHV3.53	HLA-C.A152A_T	0.187747	1.91728	0.0566346	0.999059	FALSE
IGHV3.53	HLA-C.L147W_A	0.187747	1.91728	0.0566346	0.999059	FALSE
IGHV3.53	HLA-C.L194V_A	0.187747	1.91728	0.0566346	0.999059	FALSE
IGHV3.53	HLA-C.M261V_A	0.187747	1.91728	0.0566346	0.999059	FALSE
IGHV3.53	HLA-C.P184H_A	0.187747	1.91728	0.0566346	0.999059	FALSE
IGHV3.53	HLA-C.Q253E_A	0.187747	1.91728	0.0566346	0.999059	FALSE
IGHV3.53	HLA-C.Q267P_A	0.187747	1.91728	0.0566346	0.999059	FALSE
IGHV3.53	HLA-C.S273R_A	0.187747	1.91728	0.0566346	0.999059	FALSE
IGHV7.4.1	HLA-DQB1.A38A_A	-0.0638702	-1.9158	0.0568245	0.999059	FALSE
IGHV7.4.1	HLA-DQB1.A38V_T	-0.0638702	-1.9158	0.0568245	0.999059	FALSE
IGHV1.18	HLA-DRB1.I67L_T	-0.10514	-1.91453	0.056987	0.999059	FALSE
IGHV3.13	HLA-A.F9Y_T	-0.0916738	-1.91429	0.0570174	0.999059	FALSE
IGHV1.3	HLA-B.Y67C_T	-0.229478	-1.91388	0.0570703	0.999059	FALSE
IGHV3.74	HLA-C.N80K_T	-0.244366	-1.91365	0.0570998	0.999059	FALSE
IGHV3.74	HLA-C.S77N_T	-0.244366	-1.91365	0.0570998	0.999059	FALSE
IGHV3.66	HLA-DQB1.G70R_A	0.0965512	1.91164	0.0573589	0.999059	FALSE
IGHV3.9	HLA-A.E152E_T	-1.04767	-1.91093	0.0574508	0.999059	FALSE
IGHV3.74	HLA-DRB1.S37F_T	-0.29548	-1.91086	0.05746	0.999059	FALSE
IGHV4.30.4	HLA-DRB1.W9W_T	0.00311967	1.91072	0.0574776	0.999059	FALSE
IGHV1.24	HLA-DQA1.D161E_T	0.0423785	1.91038	0.0575217	0.999059	FALSE
IGHV1.24	HLA-DQA1.F156L_T	0.0423785	1.91038	0.0575217	0.999059	FALSE
IGHV1.24	HLA-DQA1.I163S_T	0.0423785	1.91038	0.0575217	0.999059	FALSE
IGHV1.24	HLA-DQA1.I75S_T	0.0423785	1.91038	0.0575217	0.999059	FALSE
IGHV1.24	HLA-DQA1.Q175K_T	0.0423785	1.91038	0.0575217	0.999059	FALSE
IGHV1.24	HLA-DQA1.T107I_T	0.0423785	1.91038	0.0575217	0.999059	FALSE
IGHV4.28	HLA-DQA1.Q175E_T	0.00463251	1.90992	0.057581	0.999059	FALSE
IGHV1.24	HLA-DRB1.Q70R_T	-0.0331522	-1.90869	0.057741	0.999059	FALSE
IGHV3.53	HLA-DPA1.F160V_A	0.153745	1.90842	0.0577763	0.999059	FALSE
IGHV3.53	HLA-DPA1.L127P_A	0.153745	1.90842	0.0577763	0.999059	FALSE
IGHV3.53	HLA-DPA1.Q50R_A	0.153745	1.90842	0.0577763	0.999059	FALSE
IGHV3.53	HLA-DPA1.T83A_A	0.153745	1.90842	0.0577763	0.999059	FALSE
IGHV3.53	HLA-DPA1.T228P_A	0.153745	1.90842	0.0577763	0.999059	FALSE
IGHV4.30.2	HLA-DRB1.H16Y_T	-0.0363494	-1.90831	0.0577908	0.999059	FALSE
IGHV4.30.2	HLA-DRB1.R13G_T	-0.0363494	-1.90831	0.0577908	0.999059	FALSE
IGHV4.61	HLA-B.Q70Q_T	0.0360714	1.90739	0.0579096	0.999059	FALSE
IGHV4.4	HLA-B.Y67C_T	0.0989306	1.90707	0.0579524	0.999059	FALSE
IGHV3.13	HLA-A.Q62Q_T	-0.0942167	-1.90693	0.0579705	0.999059	FALSE
IGHV3.43	HLA-B.Y67F_T	0.405068	1.90636	0.0580443	0.999059	FALSE
IGHV3.30	HLA-DRB1.S37F_T	1.82273	1.9052	0.0581963	0.999059	FALSE
IGHV3.49	HLA-B.D114N_A	0.00541166	1.90415	0.0583335	0.999059	FALSE
IGHV3.d	HLA-A.T73I_T	0.0163477	1.90368	0.0583952	0.999059	FALSE
IGHV1.24	HLA-DQA1.E50L_T	-0.0308914	-1.90234	0.0585708	0.999059	FALSE
IGHV1.24	HLA-DQA1.F215L_T	-0.0308914	-1.90234	0.0585708	0.999059	FALSE
IGHV1.24	HLA-DQA1.K53R_T	-0.0308914	-1.90234	0.0585708	0.999059	FALSE
IGHV1.69	HLA-A.I95L_T	0.146467	1.90169	0.0586568	0.999059	FALSE
IGHV2.26	HLA-B.D74Y_A	0.0158732	1.90057	0.0588043	0.999059	FALSE
IGHV5.a	HLA-C.D90A_A	-0.000985266	-1.90051	0.0588116	0.999059	FALSE
IGHV3.66	HLA-C.A152T_T	-0.135602	-1.8996	0.0589322	0.999059	FALSE
IGHV3.66	HLA-C.E275G_T	-0.135602	-1.8996	0.0589322	0.999059	FALSE
IGHV3.66	HLA-C.R35Q_T	-0.135602	-1.8996	0.0589322	0.999059	FALSE
IGHV3.66	HLA-C.R35R_A	-0.135602	-1.8996	0.0589322	0.999059	FALSE
IGHV5.a	HLA-C.S24A_A	-0.000908813	-1.89931	0.0589702	0.999059	FALSE
IGHV3.15	HLA-DRB1.H16Y_T	0.0112526	1.89919	0.0589858	0.999059	FALSE
IGHV3.15	HLA-DRB1.R13G_T	0.0112526	1.89919	0.0589858	0.999059	FALSE
IGHV3.48	HLA-C.N80K_T	-0.394922	-1.89897	0.0590157	0.999059	FALSE
IGHV3.48	HLA-C.S77N_T	-0.394922	-1.89897	0.0590157	0.999059	FALSE
IGHV4.30.2	HLA-B.A69T_A	0.031416	1.89869	0.0590525	0.999059	FALSE
IGHV4.30.2	HLA-B.A71A_T	0.031416	1.89869	0.0590525	0.999059	FALSE
IGHV4.30.2	HLA-B.A71T_A	0.031416	1.89869	0.0590525	0.999059	FALSE
IGHV4.30.2	HLA-B.Q70N_A	0.031416	1.89869	0.0590525	0.999059	FALSE
IGHV3.64	HLA-B.V-15L_T	0.140311	1.89848	0.0590799	0.999059	FALSE
IGHV3.21	HLA-B.A-9G_A	0.283943	1.89665	0.0593231	0.999059	FALSE
IGHV5.a	HLA-A.I282V_T	0.00119888	1.89659	0.0593305	0.999059	FALSE
IGHV5.a	HLA-A.K311N_T	0.00119888	1.89659	0.0593305	0.999059	FALSE
IGHV5.a	HLA-A.Q62E_T	0.00119888	1.89659	0.0593305	0.999059	FALSE
IGHV5.a	HLA-A.R65G_T	0.00119888	1.89659	0.0593305	0.999059	FALSE
IGHV5.a	HLA-A.Y99F_T	0.00119888	1.89659	0.0593305	0.999059	FALSE
IGHV4.30.2	HLA-B.R131S_A	-0.0327145	-1.89612	0.0593937	0.999059	FALSE
IGHV2.5	HLA-C.E275E_A	0.0331955	1.89516	0.0595214	0.999059	FALSE
IGHV5.a	HLA-A.Y99Y_A	0.00105883	1.89355	0.0597351	0.999059	FALSE
IGHV3.66	HLA-DQB1.E74S_T	0.0979643	1.8926	0.0598623	0.999059	FALSE
IGHV3.66	HLA-DQB1.L26G_T	0.0979643	1.8926	0.0598623	0.999059	FALSE
IGHV3.72	HLA-A.E166D_T	0.00257298	1.89236	0.0598943	0.999059	FALSE
IGHV3.72	HLA-A.W167G_T	0.00257298	1.89236	0.0598943	0.999059	FALSE
IGHV3.48	HLA-DQB1.R55P_T	-0.279142	-1.89194	0.0599516	0.999059	FALSE
IGHV3.7	HLA-B.S24T_T	0.183322	1.89085	0.0600978	0.999059	FALSE
IGHV3.15	HLA-A.E152V_T	0.00949034	1.89045	0.0601505	0.999059	FALSE
IGHV3.21	HLA-B.Y116Y_T	0.285143	1.88982	0.0602351	0.999059	FALSE
IGHV1.24	HLA-B.N80I_T	0.0424951	1.88883	0.0603691	0.999059	FALSE
IGHV7.4.1	HLA-DRB1.S37F_T	-0.110034	-1.88798	0.0604835	0.999059	FALSE
IGHV3.20	HLA-DRB1.F26F_A	0.071512	1.8876	0.0605351	0.999059	FALSE
IGHV5.a	HLA-B.Y116L_T	-0.00111072	-1.88713	0.0605982	0.999059	FALSE
IGHV3.30	HLA-B.S97R_A	1.1059	1.88594	0.0607593	0.999059	FALSE
IGHV3.30.3	HLA-DPB1.M76M_A	-0.361417	-1.88572	0.0607896	0.999059	FALSE
IGHV3.64	HLA-DQB1.F87F_T	-0.163494	-1.88529	0.0608475	0.999059	FALSE
IGHV3.23	HLA-C.L-14I_A	0.455891	1.88456	0.0609476	0.999059	FALSE
IGHV1.24	HLA-B.C325S_A	-0.0291373	-1.88308	0.0611482	0.999059	FALSE
IGHV4.b	HLA-DRB1.D57V_T	0.0110699	1.88307	0.0611503	0.999059	FALSE
IGHV4.b	HLA-DRB1.Y60S_T	0.0110699	1.88307	0.0611503	0.999059	FALSE
IGHV1.18	HLA-DQB1.F87F_T	-0.119828	-1.88299	0.06116	0.999059	FALSE
IGHV4.31	HLA-C.S99F_T	-0.00155677	-1.88288	0.0611763	0.999059	FALSE
IGHV3.15	HLA-DPA1.F160V_A	0.0092457	1.88273	0.061196	0.999059	FALSE
IGHV3.15	HLA-DPA1.L127P_A	0.0092457	1.88273	0.061196	0.999059	FALSE
IGHV3.15	HLA-DPA1.Q50R_A	0.0092457	1.88273	0.061196	0.999059	FALSE
IGHV3.15	HLA-DPA1.T83A_A	0.0092457	1.88273	0.061196	0.999059	FALSE
IGHV3.15	HLA-DPA1.T228P_A	0.0092457	1.88273	0.061196	0.999059	FALSE
IGHV3.30.3	HLA-DPB1.A36V_A	-0.383993	-1.88131	0.0613893	0.999059	FALSE
IGHV3.30.3	HLA-DPB1.A55A_T	-0.383993	-1.88131	0.0613893	0.999059	FALSE
IGHV1.18	HLA-C.V304M_T	0.107402	1.88128	0.0613938	0.999059	FALSE
IGHV1.18	HLA-C.V304V_A	0.107402	1.88128	0.0613938	0.999059	FALSE
IGHV1.24	HLA-A.F9S_T	0.0374086	1.88046	0.0615062	0.999059	FALSE
IGHV6.1	HLA-DQB1.T77R_T	0.0791161	1.88033	0.0615242	0.999059	FALSE
IGHV6.1	HLA-DQB1.T77T_A	0.0791161	1.88033	0.0615242	0.999059	FALSE
IGHV3.21	HLA-DRB1.S37F_T	-0.468908	-1.87953	0.0616338	0.999059	FALSE
IGHV1.24	HLA-DRB1.A74E_T	-0.032591	-1.87735	0.0619334	0.999059	FALSE
IGHV3.53	HLA-B.L81A_T	0.159831	1.876	0.062119	0.999059	FALSE
IGHV3.53	HLA-B.S77N_T	0.159831	1.876	0.062119	0.999059	FALSE
IGHV3.64	HLA-DQB1.E74E_A	0.133612	1.87572	0.0621577	0.999059	FALSE
IGHV3.64	HLA-DQB1.L75V_T	0.133612	1.87572	0.0621577	0.999059	FALSE
IGHV3.64	HLA-DQB1.T71T_A	0.133612	1.87572	0.0621577	0.999059	FALSE
IGHV2.5	HLA-B.I66N_T	0.0529027	1.8753	0.0622156	0.999059	FALSE
IGHV2.5	HLA-B.Q65R_T	0.0529027	1.8753	0.0622156	0.999059	FALSE
IGHV2.5	HLA-B.Q70S_T	0.0529027	1.8753	0.0622156	0.999059	FALSE
IGHV2.5	HLA-B.R62G_T	0.0529027	1.8753	0.0622156	0.999059	FALSE
IGHV2.5	HLA-B.Y67M_T	0.0529027	1.8753	0.0622156	0.999059	FALSE
IGHV3.64	HLA-DRB1.A73G_T	0.202913	1.87512	0.062241	0.999059	FALSE
IGHV4.28	HLA-DRB1.S37L_T	0.00656234	1.8745	0.0623269	0.999059	FALSE
IGHV4.28	HLA-DRB1.V85A_T	0.00656234	1.8745	0.0623269	0.999059	FALSE
IGHV4.28	HLA-DRB1.V38L_T	0.00656234	1.8745	0.0623269	0.999059	FALSE
IGHV1.2	HLA-DQA1.A-12T_T	-0.191838	-1.87442	0.0623372	0.999059	FALSE
IGHV4.30.2	HLA-B.L95I_T	-0.0336509	-1.87369	0.0624387	0.999059	FALSE
IGHV3.20	HLA-C.A152T_T	0.104702	1.87306	0.0625265	0.999059	FALSE
IGHV3.20	HLA-C.E275G_T	0.104702	1.87306	0.0625265	0.999059	FALSE
IGHV3.20	HLA-C.R35Q_T	0.104702	1.87306	0.0625265	0.999059	FALSE
IGHV3.20	HLA-C.R35R_A	0.104702	1.87306	0.0625265	0.999059	FALSE
IGHV1.18	HLA-A.E253Q_T	-0.0921657	-1.87275	0.0625696	0.999059	FALSE
IGHV1.18	HLA-A.G207S_T	-0.0921657	-1.87275	0.0625696	0.999059	FALSE
IGHV1.18	HLA-A.I194V_T	-0.0921657	-1.87275	0.0625696	0.999059	FALSE
IGHV1.18	HLA-A.L294F_T	-0.0921657	-1.87275	0.0625696	0.999059	FALSE
IGHV1.18	HLA-A.P193A_T	-0.0921657	-1.87275	0.0625696	0.999059	FALSE
IGHV4.31	HLA-A.E152A_T	-0.000955141	-1.87204	0.0626679	0.999059	FALSE
IGHV4.30.4	HLA-DRB1.F26L_T	0.00350837	1.87136	0.0627628	0.999059	FALSE
IGHV1.45	HLA-DRB1.Q149H_T	0.027164	1.87123	0.0627806	0.999059	FALSE
IGHV4.34	HLA-DQB1.E74E_A	0.0523404	1.87055	0.0628754	0.999059	FALSE
IGHV4.34	HLA-DQB1.L75V_T	0.0523404	1.87055	0.0628754	0.999059	FALSE
IGHV4.34	HLA-DQB1.T71T_A	0.0523404	1.87055	0.0628754	0.999059	FALSE
IGHV4.31	HLA-DRB1.R13S_T	-0.00106113	-1.87005	0.0629457	0.999059	FALSE
IGHV5.a	HLA-DQB1.A-26S_T	0.00106337	1.86846	0.0631681	0.999059	FALSE
IGHV5.a	HLA-DQB1.G125S_T	0.00106337	1.86846	0.0631681	0.999059	FALSE
IGHV5.a	HLA-DQB1.L-4S_T	0.00106337	1.86846	0.0631681	0.999059	FALSE
IGHV5.a	HLA-DQB1.M-8I_T	0.00106337	1.86846	0.0631681	0.999059	FALSE
IGHV5.a	HLA-DQB1.M14L_T	0.00106337	1.86846	0.0631681	0.999059	FALSE
IGHV5.a	HLA-DQB1.Q224R_T	0.00106337	1.86846	0.0631681	0.999059	FALSE
IGHV5.a	HLA-DQB1.T71A_T	0.00106337	1.86846	0.0631681	0.999059	FALSE
IGHV5.a	HLA-DQB1.V116I_T	0.00106337	1.86846	0.0631681	0.999059	FALSE
IGHV1.3	HLA-DRB1.Y60Y_A	0.135821	1.8677	0.063274	0.999059	FALSE
IGHV2.70	HLA-A.Q62Q_T	0.0402924	1.8675	0.0633023	0.999059	FALSE
IGHV2.70	HLA-B.R156L_A	-0.0422555	-1.86713	0.0633541	0.999059	FALSE
IGHV5.a	HLA-C.E177K_T	0.0013329	1.86694	0.063381	0.999059	FALSE
IGHV3.43	HLA-DPB1.A55E_A	0.211961	1.86399	0.0637956	0.999059	FALSE
IGHV1.45	HLA-DRB1.Q96H_A	-0.030685	-1.86314	0.063916	0.999059	FALSE
IGHV3.13	HLA-DPB1.A55D_T	0.0953736	1.86254	0.0640013	0.999059	FALSE
IGHV3.13	HLA-DPB1.A56E_T	0.0953736	1.86254	0.0640013	0.999059	FALSE
IGHV3.21	HLA-B.D74Y_A	-0.274652	-1.86222	0.0640458	0.999059	FALSE
IGHV3.33	HLA-B.Y116F_T	1.05656	1.86185	0.0640993	0.999059	FALSE
IGHV1.45	HLA-DRB1.K12K_A	0.0264899	1.86167	0.0641242	0.999059	FALSE
IGHV1.45	HLA-DRB1.K12T_T	0.0264899	1.86167	0.0641242	0.999059	FALSE
IGHV1.45	HLA-DRB1.P11S_T	0.0264899	1.86167	0.0641242	0.999059	FALSE
IGHV1.45	HLA-DRB1.Q10Y_T	0.0264899	1.86167	0.0641242	0.999059	FALSE
IGHV3.23	HLA-DRB1.T181M_T	0.454119	1.86163	0.0641298	0.999059	FALSE
IGHV3.23	HLA-DRB1.T181T_A	0.454119	1.86163	0.0641298	0.999059	FALSE
IGHV4.30.2	HLA-DRB1.I67L_T	0.0325089	1.8612	0.0641907	0.999059	FALSE
IGHV3.30	HLA-DPB1.A55D_T	-1.08984	-1.86089	0.0642348	0.999059	FALSE
IGHV3.30	HLA-DPB1.A56E_T	-1.08984	-1.86089	0.0642348	0.999059	FALSE
IGHV5.a	HLA-DRB1.I67I_T	-0.000919933	-1.86071	0.0642599	0.999059	FALSE
IGHV3.64	HLA-DQB1.Y30Y_A	0.136587	1.85968	0.0644071	0.999059	FALSE
IGHV4.b	HLA-B.L81A_T	-0.0115515	-1.85954	0.0644269	0.999059	FALSE
IGHV4.b	HLA-B.S77N_T	-0.0115515	-1.85954	0.0644269	0.999059	FALSE
IGHV3.72	HLA-A.D116D_A	0.00206477	1.85927	0.0644657	0.999059	FALSE
IGHV3.43	HLA-DPA1.A11M_A	0.219947	1.85924	0.0644699	0.999059	FALSE
IGHV1.f	HLA-DQB1.E74S_T	0.00595237	1.85903	0.0644995	0.999059	FALSE
IGHV1.f	HLA-DQB1.L26G_T	0.00595237	1.85903	0.0644995	0.999059	FALSE
IGHV4.59	HLA-B.D114D_T	0.0639734	1.85859	0.0645617	0.999059	FALSE
IGHV4.61	HLA-B.Y67S_A	0.031388	1.85808	0.0646343	0.999059	FALSE
IGHV1.46	HLA-DPB1.A55D_T	0.0446277	1.85804	0.0646406	0.999059	FALSE
IGHV1.46	HLA-DPB1.A56E_T	0.0446277	1.85804	0.0646406	0.999059	FALSE
IGHV2.70	HLA-B.A69R_T	-0.0543197	-1.85695	0.0647962	0.999059	FALSE
IGHV2.70	HLA-B.E76V_T	-0.0543197	-1.85695	0.0647962	0.999059	FALSE
IGHV2.70	HLA-B.I66K_T	-0.0543197	-1.85695	0.0647962	0.999059	FALSE
IGHV4.b	HLA-B.G83R_T	-0.0114233	-1.85533	0.0650279	0.999059	FALSE
IGHV4.b	HLA-B.N80N_A	-0.0114233	-1.85533	0.0650279	0.999059	FALSE
IGHV4.b	HLA-B.R82L_T	-0.0114233	-1.85533	0.0650279	0.999059	FALSE
IGHV1.24	HLA-B.D114D_T	0.0296369	1.85527	0.0650365	0.999059	FALSE
IGHV4.61	HLA-DRB1.H16Y_T	-0.0381842	-1.85509	0.0650627	0.999059	FALSE
IGHV4.61	HLA-DRB1.R13G_T	-0.0381842	-1.85509	0.0650627	0.999059	FALSE
IGHV1.f	HLA-DRB1.I67I_T	-0.00563674	-1.85365	0.0652699	0.999059	FALSE
IGHV1.18	HLA-A.Q62Q_T	0.0960454	1.85314	0.0653434	0.999059	FALSE
IGHV3.72	HLA-A.E152E_T	-0.00303936	-1.85228	0.0654672	0.999059	FALSE
IGHV4.30.2	HLA-B.E163E_T	-0.0293402	-1.85218	0.0654816	0.999059	FALSE
IGHV3.30	HLA-DRB1.S37S_T	-1.20036	-1.8519	0.0655215	0.999059	FALSE
IGHV4.28	HLA-DQB1.A-26S_T	-0.00541721	-1.85153	0.0655751	0.999059	FALSE
IGHV4.28	HLA-DQB1.G125S_T	-0.00541721	-1.85153	0.0655751	0.999059	FALSE
IGHV4.28	HLA-DQB1.L-4S_T	-0.00541721	-1.85153	0.0655751	0.999059	FALSE
IGHV4.28	HLA-DQB1.M-8I_T	-0.00541721	-1.85153	0.0655751	0.999059	FALSE
IGHV4.28	HLA-DQB1.M14L_T	-0.00541721	-1.85153	0.0655751	0.999059	FALSE
IGHV4.28	HLA-DQB1.Q224R_T	-0.00541721	-1.85153	0.0655751	0.999059	FALSE
IGHV4.28	HLA-DQB1.T71A_T	-0.00541721	-1.85153	0.0655751	0.999059	FALSE
IGHV4.28	HLA-DQB1.V116I_T	-0.00541721	-1.85153	0.0655751	0.999059	FALSE
IGHV1.18	HLA-C.A152A_T	-0.111812	-1.8514	0.0655944	0.999059	FALSE
IGHV1.18	HLA-C.L147W_A	-0.111812	-1.8514	0.0655944	0.999059	FALSE
IGHV1.18	HLA-C.L194V_A	-0.111812	-1.8514	0.0655944	0.999059	FALSE
IGHV1.18	HLA-C.M261V_A	-0.111812	-1.8514	0.0655944	0.999059	FALSE
IGHV1.18	HLA-C.P184H_A	-0.111812	-1.8514	0.0655944	0.999059	FALSE
IGHV1.18	HLA-C.Q253E_A	-0.111812	-1.8514	0.0655944	0.999059	FALSE
IGHV1.18	HLA-C.Q267P_A	-0.111812	-1.8514	0.0655944	0.999059	FALSE
IGHV1.18	HLA-C.S273R_A	-0.111812	-1.8514	0.0655944	0.999059	FALSE
IGHV3.20	HLA-DQB1.T77R_T	-0.0774444	-1.85138	0.0655971	0.999059	FALSE
IGHV3.20	HLA-DQB1.T77T_A	-0.0774444	-1.85138	0.0655971	0.999059	FALSE
IGHV4.b	HLA-DQA1.A160D_T	0.0123773	1.85069	0.0656966	0.999059	FALSE
IGHV3.20	HLA-DRB1.T181M_T	0.0781508	1.84966	0.0658449	0.999059	FALSE
IGHV3.20	HLA-DRB1.T181T_A	0.0781508	1.84966	0.0658449	0.999059	FALSE
IGHV3.7	HLA-C.S116S_T	0.179661	1.84801	0.0660851	0.999059	FALSE
IGHV5.a	HLA-C.A152T_T	0.00132562	1.84602	0.0663748	0.999059	FALSE
IGHV5.a	HLA-C.E275G_T	0.00132562	1.84602	0.0663748	0.999059	FALSE
IGHV5.a	HLA-C.R35Q_T	0.00132562	1.84602	0.0663748	0.999059	FALSE
IGHV5.a	HLA-C.R35R_A	0.00132562	1.84602	0.0663748	0.999059	FALSE
IGHV3.21	HLA-C.A152A_T	0.31704	1.84585	0.0663996	0.999059	FALSE
IGHV3.21	HLA-C.L147W_A	0.31704	1.84585	0.0663996	0.999059	FALSE
IGHV3.21	HLA-C.L194V_A	0.31704	1.84585	0.0663996	0.999059	FALSE
IGHV3.21	HLA-C.M261V_A	0.31704	1.84585	0.0663996	0.999059	FALSE
IGHV3.21	HLA-C.P184H_A	0.31704	1.84585	0.0663996	0.999059	FALSE
IGHV3.21	HLA-C.Q253E_A	0.31704	1.84585	0.0663996	0.999059	FALSE
IGHV3.21	HLA-C.Q267P_A	0.31704	1.84585	0.0663996	0.999059	FALSE
IGHV3.21	HLA-C.S273R_A	0.31704	1.84585	0.0663996	0.999059	FALSE
IGHV3.7	HLA-B.V-15L_T	0.195087	1.84531	0.0664789	0.999059	FALSE
IGHV3.23	HLA-C.D114N_T	0.504576	1.84453	0.0665927	0.999059	FALSE
IGHV3.NL1	HLA-DQB1.E74S_T	0.309333	1.8442	0.0666409	0.999059	FALSE
IGHV3.NL1	HLA-DQB1.L26G_T	0.309333	1.8442	0.0666409	0.999059	FALSE
IGHV4.b	HLA-C.R21H_T	-0.0111749	-1.84399	0.066672	0.999059	FALSE
IGHV7.4.1	HLA-A.D77D_A	0.0705649	1.84306	0.0668078	0.999059	FALSE
IGHV7.4.1	HLA-A.V76V_A	0.0705649	1.84306	0.0668078	0.999059	FALSE
IGHV7.4.1	HLA-DRB1.T77N_T	-0.116341	-1.84302	0.0668141	0.999059	FALSE
IGHV3.20	HLA-DRB1.F31I_T	0.0871419	1.84284	0.0668406	0.999059	FALSE
IGHV4.b	HLA-DQA1.M-5T_T	0.0140836	1.84279	0.0668468	0.999059	FALSE
IGHV3.15	HLA-DRB1.S0A_A	-0.0116212	-1.84226	0.0669256	0.999059	FALSE
IGHV3.43	HLA-DQA1.A69L_T	0.214025	1.8416	0.0670222	0.999059	FALSE
IGHV3.43	HLA-DQA1.L-15M_T	0.214025	1.8416	0.0670222	0.999059	FALSE
IGHV4.31	HLA-DQB1.F87Y_T	-0.000977102	-1.84115	0.067089	0.999059	FALSE
IGHV4.31	HLA-DQB1.S-5T_A	-0.000900794	-1.84097	0.0671145	0.999059	FALSE
IGHV3.73	HLA-B.Y116S_T	0.00839523	1.84072	0.0671521	0.999059	FALSE
IGHV3.43	HLA-C.E173K_T	-0.245551	-1.84037	0.0672028	0.999059	FALSE
IGHV3.43	HLA-C.L103V_T	-0.245551	-1.84037	0.0672028	0.999059	FALSE
IGHV3.43	HLA-C.T163L_T	-0.245551	-1.84037	0.0672028	0.999059	FALSE
IGHV3.21	HLA-A.D116D_A	-0.270342	-1.84032	0.0672109	0.999059	FALSE
IGHV3.7	HLA-B.E163E_T	0.178687	1.84021	0.067227	0.999059	FALSE
IGHV3.20	HLA-DPB1.M76I_T	0.108927	1.83986	0.067278	0.999059	FALSE
IGHV1.24	HLA-DQA1.E40G_T	0.0327486	1.83977	0.0672918	0.999059	FALSE
IGHV1.24	HLA-DQA1.E50V_T	0.0327486	1.83977	0.0672918	0.999059	FALSE
IGHV1.24	HLA-DQA1.F51L_T	0.0327486	1.83977	0.0672918	0.999059	FALSE
IGHV1.24	HLA-DQA1.K53Q_T	0.0327486	1.83977	0.0672918	0.999059	FALSE
IGHV1.24	HLA-DQA1.R47C_T	0.0327486	1.83977	0.0672918	0.999059	FALSE
IGHV5.51	HLA-B.R145L_T	0.101213	1.83967	0.067306	0.999059	FALSE
IGHV1.18	HLA-B.S97S_T	-0.17299	-1.83949	0.0673328	0.999059	FALSE
IGHV4.61	HLA-DQB1.E74E_A	0.0330223	1.83936	0.0673528	0.999059	FALSE
IGHV4.61	HLA-DQB1.L75V_T	0.0330223	1.83936	0.0673528	0.999059	FALSE
IGHV4.61	HLA-DQB1.T71T_A	0.0330223	1.83936	0.0673528	0.999059	FALSE
IGHV3.20	HLA-DRB1.F26Y_T	0.0826842	1.83923	0.0673714	0.999059	FALSE
IGHV3.30	HLA-DRB1.A73G_T	1.59359	1.83917	0.0673806	0.999059	FALSE
IGHV4.4	HLA-B.E163L_T	-0.0550221	-1.83821	0.0675222	0.999059	FALSE
IGHV1.69	HLA-A.L156Q_A	-0.108624	-1.83801	0.067552	0.999059	FALSE
IGHV7.4.1	HLA-B.Y67C_T	-0.100053	-1.83739	0.067644	0.999059	FALSE
IGHV3.33	HLA-B.L95L_A	-0.635248	-1.83629	0.0678069	0.999059	FALSE
IGHV1.3	HLA-DRB1.I67F_T	0.137135	1.8359	0.0678653	0.999059	FALSE
IGHV3.13	HLA-DPA1.A11M_A	0.0863631	1.83571	0.0678926	0.999059	FALSE
IGHV3.NL1	HLA-C.R219W_A	-0.282408	-1.83559	0.067911	0.999059	FALSE
IGHV1.3	HLA-B.E163T_T	-0.168354	-1.83465	0.0680505	0.999059	FALSE
IGHV3.43	HLA-C.L156L_A	0.209792	1.8346	0.0680575	0.999059	FALSE
IGHV3.53	HLA-B.S77S_A	0.155439	1.83439	0.0680898	0.999059	FALSE
IGHV3.73	HLA-DRB1.Q70D_T	0.00836052	1.83298	0.0682998	0.999059	FALSE
IGHV3.30	HLA-DPB1.A55E_A	-0.94806	-1.83291	0.0683096	0.999059	FALSE
IGHV3.20	HLA-DPB1.F35Y_T	0.119877	1.83203	0.0684415	0.999059	FALSE
IGHV3.15	HLA-DQA1.A45V_A	-0.00892596	-1.8309	0.0686113	0.999059	FALSE
IGHV3.15	HLA-DQA1.A69A_T	-0.00892596	-1.8309	0.0686113	0.999059	FALSE
IGHV3.15	HLA-DQA1.C11Y_A	-0.00892596	-1.8309	0.0686113	0.999059	FALSE
IGHV3.15	HLA-DQA1.E50E_T	-0.00892596	-1.8309	0.0686113	0.999059	FALSE
IGHV3.15	HLA-DQA1.F18S_A	-0.00892596	-1.8309	0.0686113	0.999059	FALSE
IGHV3.15	HLA-DQA1.G55R_A	-0.00892596	-1.8309	0.0686113	0.999059	FALSE
IGHV3.15	HLA-DQA1.G61F_A	-0.00892596	-1.8309	0.0686113	0.999059	FALSE
IGHV3.15	HLA-DQA1.K53K_T	-0.00892596	-1.8309	0.0686113	0.999059	FALSE
IGHV3.15	HLA-DQA1.M66I_A	-0.00892596	-1.8309	0.0686113	0.999059	FALSE
IGHV3.15	HLA-DQA1.M76M_T	-0.00892596	-1.8309	0.0686113	0.999059	FALSE
IGHV3.15	HLA-DQA1.Q175Q_T	-0.00892596	-1.8309	0.0686113	0.999059	FALSE
IGHV3.15	HLA-DQA1.Q218R_A	-0.00892596	-1.8309	0.0686113	0.999059	FALSE
IGHV3.15	HLA-DQA1.R47R_T	-0.00892596	-1.8309	0.0686113	0.999059	FALSE
IGHV3.15	HLA-DQA1.R64T_A	-0.00892596	-1.8309	0.0686113	0.999059	FALSE
IGHV3.15	HLA-DQA1.S52S_T	-0.00892596	-1.8309	0.0686113	0.999059	FALSE
IGHV3.15	HLA-DQA1.W48L_A	-0.00892596	-1.8309	0.0686113	0.999059	FALSE
IGHV3.15	HLA-DQA1.Y80S_A	-0.00892596	-1.8309	0.0686113	0.999059	FALSE
IGHV3.48	HLA-C.L95L_A	-0.300805	-1.83024	0.0687095	0.999059	FALSE
IGHV3.30	HLA-C.R97W_T	1.01838	1.83023	0.0687118	0.999059	FALSE
IGHV4.28	HLA-DRB1.R13S_T	-0.00548383	-1.82972	0.0687885	0.999059	FALSE
IGHV3.13	HLA-DPA1.F160V_A	0.0866894	1.82913	0.0688766	0.999059	FALSE
IGHV3.13	HLA-DPA1.L127P_A	0.0866894	1.82913	0.0688766	0.999059	FALSE
IGHV3.13	HLA-DPA1.Q50R_A	0.0866894	1.82913	0.0688766	0.999059	FALSE
IGHV3.13	HLA-DPA1.T83A_A	0.0866894	1.82913	0.0688766	0.999059	FALSE
IGHV3.13	HLA-DPA1.T228P_A	0.0866894	1.82913	0.0688766	0.999059	FALSE
IGHV3.15	HLA-DQB1.D-20G_A	-0.00948816	-1.8289	0.0689117	0.999059	FALSE
IGHV3.15	HLA-DQB1.L-4P_A	-0.00948816	-1.8289	0.0689117	0.999059	FALSE
IGHV3.15	HLA-DQB1.L-3V_A	-0.00948816	-1.8289	0.0689117	0.999059	FALSE
IGHV3.15	HLA-DQB1.S-5S_T	-0.00948816	-1.8289	0.0689117	0.999059	FALSE
IGHV3.15	HLA-DQB1.V203I_A	-0.00948816	-1.8289	0.0689117	0.999059	FALSE
IGHV3.30.3	HLA-DQA1.R41K_T	-0.549414	-1.82845	0.0689786	0.999059	FALSE
IGHV3.30.3	HLA-DQA1.S130A_T	-0.549414	-1.82845	0.0689786	0.999059	FALSE
IGHV7.4.1	HLA-A.E166D_T	0.0768539	1.82827	0.069006	0.999059	FALSE
IGHV7.4.1	HLA-A.W167G_T	0.0768539	1.82827	0.069006	0.999059	FALSE
IGHV3.23	HLA-B.V282I_A	0.383488	1.82816	0.0690234	0.999059	FALSE
IGHV1.24	HLA-A.E152V_T	0.0293305	1.8277	0.0690921	0.999059	FALSE
IGHV2.70	HLA-A.A90D_T	0.039249	1.82657	0.069262	0.999059	FALSE
IGHV2.70	HLA-A.T163R_T	0.039249	1.82657	0.069262	0.999059	FALSE
IGHV4.61	HLA-DQB1.F87F_T	-0.039912	-1.82567	0.0693988	0.999059	FALSE
IGHV4.30.2	HLA-B.S24A_A	-0.027875	-1.82553	0.0694194	0.999059	FALSE
IGHV4.30.2	HLA-DPB1.E57D_T	0.0489448	1.82546	0.0694302	0.999059	FALSE
IGHV3.21	HLA-B.T143S_T	0.321123	1.82517	0.069475	0.999059	FALSE
IGHV3.21	HLA-B.W147L_T	0.321123	1.82517	0.069475	0.999059	FALSE
IGHV1.18	HLA-DRB1.A74E_T	0.100338	1.82489	0.069517	0.999059	FALSE
IGHV1.58	HLA-DRB1.Q149H_T	0.0174208	1.82409	0.0696377	0.999059	FALSE
IGHV1.69	HLA-A.A149T_T	-0.183659	-1.82181	0.0699844	0.999059	FALSE
IGHV2.70	HLA-B.L95L_A	0.0378805	1.82117	0.070083	0.999059	FALSE
IGHV3.53	HLA-B.S97S_T	-0.277489	-1.81834	0.0705151	0.999059	FALSE
IGHV1.3	HLA-DRB1.Q70Q_T	-0.13894	-1.81561	0.0709356	0.999059	FALSE
IGHV3.64	HLA-B.L95W_T	0.152784	1.8154	0.0709682	0.999059	FALSE
IGHV5.a	HLA-A.G79R_T	0.00114437	1.81519	0.0709999	0.999059	FALSE
IGHV5.a	HLA-A.G83R_T	0.00114437	1.81519	0.0709999	0.999059	FALSE
IGHV5.a	HLA-A.L81A_T	0.00114437	1.81519	0.0709999	0.999059	FALSE
IGHV5.a	HLA-A.R82L_T	0.00114437	1.81519	0.0709999	0.999059	FALSE
IGHV5.a	HLA-A.T80I_T	0.00114437	1.81519	0.0709999	0.999059	FALSE
IGHV5.a	HLA-A.V76E_T	0.00114437	1.81519	0.0709999	0.999059	FALSE
IGHV4.b	HLA-C.D9F_T	0.0123047	1.81514	0.0710073	0.999059	FALSE
IGHV4.b	HLA-C.R6K_T	0.0123047	1.81514	0.0710073	0.999059	FALSE
IGHV4.b	HLA-C.S99C_T	0.0123047	1.81514	0.0710073	0.999059	FALSE
IGHV4.b	HLA-C.V248M_T	0.0123047	1.81514	0.0710073	0.999059	FALSE
IGHV1.3	HLA-DRB1.A71R_A	-0.144746	-1.81508	0.0710173	0.999059	FALSE
IGHV1.45	HLA-A.F9T_T	0.0408435	1.815	0.07103	0.999059	FALSE
IGHV4.34	HLA-B.K178T_A	-0.0575122	-1.81418	0.0711568	0.999059	FALSE
IGHV3.30	HLA-B.Y116L_T	1.1896	1.81405	0.0711758	0.999059	FALSE
IGHV1.24	HLA-C.R219W_A	-0.0279181	-1.81262	0.071397	0.999059	FALSE
IGHV1.58	HLA-C.D9D_T	-0.0195949	-1.81256	0.071407	0.999059	FALSE
IGHV4.61	HLA-DQB1.Y30H_T	0.0355885	1.81221	0.0714617	0.999059	FALSE
IGHV1.2	HLA-C.E173K_T	-0.110055	-1.81215	0.0714707	0.999059	FALSE
IGHV1.2	HLA-C.L103V_T	-0.110055	-1.81215	0.0714707	0.999059	FALSE
IGHV1.2	HLA-C.T163L_T	-0.110055	-1.81215	0.0714707	0.999059	FALSE
IGHV3.d	HLA-DQB1.G13A_T	0.0096088	1.81124	0.0716122	0.999059	FALSE
IGHV3.d	HLA-DQB1.L26Y_T	0.0096088	1.81124	0.0716122	0.999059	FALSE
IGHV3.d	HLA-DQB1.R167H_T	0.0096088	1.81124	0.0716122	0.999059	FALSE
IGHV4.61	HLA-DQB1.D57S_T	0.0413218	1.8108	0.07168	0.999059	FALSE
IGHV4.61	HLA-DQB1.Q126H_T	0.0413218	1.8108	0.07168	0.999059	FALSE
IGHV3.43	HLA-DRB1.D28D_A	0.209887	1.81027	0.0717629	0.999059	FALSE
IGHV3.43	HLA-DRB1.Y30Y_A	0.209887	1.81027	0.0717629	0.999059	FALSE
IGHV1.69	HLA-B.Y67S_A	-0.107413	-1.81005	0.0717969	0.999059	FALSE
IGHV3.20	HLA-B.S11A_A	0.0868009	1.80968	0.0718539	0.999059	FALSE
IGHV3.20	HLA-B.V12M_A	0.0868009	1.80968	0.0718539	0.999059	FALSE
IGHV3.48	HLA-C.L95I_T	-0.301692	-1.80916	0.0719358	0.999059	FALSE
IGHV6.1	HLA-DRB1.S37F_T	0.121835	1.80836	0.0720608	0.999059	FALSE
IGHV5.a	HLA-DQB1.Y30H_T	0.00101313	1.80798	0.0721195	0.999059	FALSE
IGHV4.b	HLA-B.S77S_A	-0.0111656	-1.80703	0.0722685	0.999059	FALSE
IGHV1.69	HLA-A.I95V_T	-0.114667	-1.80598	0.0724325	0.999059	FALSE
IGHV4.b	HLA-DQA1.Q34E_T	0.00989424	1.80519	0.0725558	0.999059	FALSE
IGHV1.45	HLA-DRB1.A-15A_A	0.026401	1.80511	0.0725688	0.999059	FALSE
IGHV1.45	HLA-DRB1.A-15V_T	0.026401	1.80511	0.0725688	0.999059	FALSE
IGHV1.45	HLA-DRB1.K-24R_T	0.026401	1.80511	0.0725688	0.999059	FALSE
IGHV3.15	HLA-DQB1.G70G_T	-0.00986568	-1.80423	0.0727067	0.999059	FALSE
IGHV3.21	HLA-DQB1.E74S_T	-0.272765	-1.80407	0.0727324	0.999059	FALSE
IGHV3.21	HLA-DQB1.L26G_T	-0.272765	-1.80407	0.0727324	0.999059	FALSE
IGHV1.24	HLA-A.G79R_T	0.0366757	1.80407	0.0727326	0.999059	FALSE
IGHV1.24	HLA-A.G83R_T	0.0366757	1.80407	0.0727326	0.999059	FALSE
IGHV1.24	HLA-A.L81A_T	0.0366757	1.80407	0.0727326	0.999059	FALSE
IGHV1.24	HLA-A.R82L_T	0.0366757	1.80407	0.0727326	0.999059	FALSE
IGHV1.24	HLA-A.T80I_T	0.0366757	1.80407	0.0727326	0.999059	FALSE
IGHV1.24	HLA-A.V76E_T	0.0366757	1.80407	0.0727326	0.999059	FALSE
IGHV3.20	HLA-DQB1.Y30Y_A	-0.0742053	-1.80404	0.0727366	0.999059	FALSE
IGHV3.48	HLA-DPB1.A55E_A	0.245594	1.80349	0.0728236	0.999059	FALSE
IGHV3.7	HLA-B.I66N_T	0.352247	1.80318	0.0728721	0.999059	FALSE
IGHV3.7	HLA-B.Q65R_T	0.352247	1.80318	0.0728721	0.999059	FALSE
IGHV3.7	HLA-B.Q70S_T	0.352247	1.80318	0.0728721	0.999059	FALSE
IGHV3.7	HLA-B.R62G_T	0.352247	1.80318	0.0728721	0.999059	FALSE
IGHV3.7	HLA-B.Y67M_T	0.352247	1.80318	0.0728721	0.999059	FALSE
IGHV4.4	HLA-B.Y116F_T	0.0936153	1.80288	0.0729198	0.999059	FALSE
IGHV3.64	HLA-B.S97T_T	0.152027	1.8028	0.0729326	0.999059	FALSE
IGHV1.45	HLA-A.R114Q_T	0.0377112	1.80251	0.0729778	0.999059	FALSE
IGHV3.13	HLA-C.C1G_T	-0.0927293	-1.8025	0.0729805	0.999059	FALSE
IGHV2.26	HLA-B.D114D_T	-0.0146905	-1.80238	0.0729987	0.999059	FALSE
IGHV1.45	HLA-DRB1.Q10Q_A	0.0261048	1.80217	0.0730315	0.999059	FALSE
IGHV3.66	HLA-DPB1.I65L_T	0.164548	1.80196	0.0730647	0.999059	FALSE
IGHV3.33	HLA-DRB1.P11P_T	0.778958	1.80084	0.0732419	0.999059	FALSE
IGHV3.33	HLA-DRB1.R13R_T	0.778958	1.80084	0.0732419	0.999059	FALSE
IGHV2.26	HLA-B.E45M_T	-0.0141718	-1.80042	0.0733094	0.999059	FALSE
IGHV2.26	HLA-B.E46A_T	-0.0141718	-1.80042	0.0733094	0.999059	FALSE
IGHV3.9	HLA-DQB1.F87F_T	0.824141	1.80026	0.0733344	0.999059	FALSE
IGHV4.4	HLA-DQB1.F9Y_A	-0.0690083	-1.79977	0.0734115	0.999059	FALSE
IGHV1.46	HLA-DPB1.F35L_A	0.0379463	1.79887	0.073554	0.999059	FALSE
IGHV1.24	HLA-A.I282V_T	0.0366952	1.79879	0.0735671	0.999059	FALSE
IGHV1.24	HLA-A.K311N_T	0.0366952	1.79879	0.0735671	0.999059	FALSE
IGHV1.24	HLA-A.Q62E_T	0.0366952	1.79879	0.0735671	0.999059	FALSE
IGHV1.24	HLA-A.R65G_T	0.0366952	1.79879	0.0735671	0.999059	FALSE
IGHV1.24	HLA-A.Y99F_T	0.0366952	1.79879	0.0735671	0.999059	FALSE
IGHV4.31	HLA-DQB1.E74S_T	-0.000911995	-1.79844	0.0736234	0.999059	FALSE
IGHV4.31	HLA-DQB1.L26G_T	-0.000911995	-1.79844	0.0736234	0.999059	FALSE
IGHV4.b	HLA-B.I66N_T	-0.021327	-1.79838	0.073632	0.999059	FALSE
IGHV4.b	HLA-B.Q65R_T	-0.021327	-1.79838	0.073632	0.999059	FALSE
IGHV4.b	HLA-B.Q70S_T	-0.021327	-1.79838	0.073632	0.999059	FALSE
IGHV4.b	HLA-B.R62G_T	-0.021327	-1.79838	0.073632	0.999059	FALSE
IGHV4.b	HLA-B.Y67M_T	-0.021327	-1.79838	0.073632	0.999059	FALSE
IGHV4.4	HLA-B.T94I_T	-0.0651552	-1.79757	0.073761	0.999059	FALSE
IGHV4.4	HLA-B.T94T_A	-0.0651552	-1.79757	0.073761	0.999059	FALSE
IGHV1.24	HLA-DRB1.F31F_A	-0.0332846	-1.79728	0.0738071	0.999059	FALSE
IGHV1.24	HLA-DRB1.R13F_T	-0.0332846	-1.79728	0.0738071	0.999059	FALSE
IGHV2.5	HLA-C.R219W_A	0.0246353	1.79421	0.0742979	0.999059	FALSE
IGHV1.2	HLA-A.K144Q_T	-0.12844	-1.79406	0.0743219	0.999059	FALSE
IGHV3.43	HLA-DRB1.D57V_T	0.214052	1.79391	0.0743462	0.999059	FALSE
IGHV3.43	HLA-DRB1.Y60S_T	0.214052	1.79391	0.0743462	0.999059	FALSE
IGHV4.61	HLA-C.E275E_A	-0.0383278	-1.79267	0.0745447	0.999059	FALSE
IGHV4.34	HLA-DRB1.S37N_T	-0.0555139	-1.79081	0.0748443	0.999059	FALSE
IGHV3.48	HLA-A.I95V_T	0.270759	1.79049	0.0748947	0.999059	FALSE
IGHV3.11	HLA-B.L95I_T	-0.289194	-1.78953	0.0750494	0.999059	FALSE
IGHV4.59	HLA-DQB1.F9Y_A	-0.0737294	-1.78905	0.075128	0.999059	FALSE
IGHV4.61	HLA-A.F9Y_T	-0.0308617	-1.78805	0.0752902	0.999059	FALSE
IGHV3.d	HLA-A.I142T_T	-0.00984089	-1.78794	0.0753068	0.999059	FALSE
IGHV3.d	HLA-A.R145H_T	-0.00984089	-1.78794	0.0753068	0.999059	FALSE
IGHV1.24	HLA-C.T94I_T	0.0302515	1.78684	0.0754847	0.999059	FALSE
IGHV3.23	HLA-B.Y67C_T	0.64521	1.78647	0.0755456	0.999059	FALSE
IGHV3.d	HLA-C.N80K_T	0.0134876	1.78637	0.0755613	0.999059	FALSE
IGHV3.d	HLA-C.S77N_T	0.0134876	1.78637	0.0755613	0.999059	FALSE
IGHV3.49	HLA-C.S116S_T	0.00505538	1.78585	0.0756465	0.999059	FALSE
IGHV3.72	HLA-A.E152V_T	0.0019511	1.78543	0.0757141	0.999059	FALSE
IGHV4.30.4	HLA-DRB1.S37S_T	0.00297479	1.78487	0.0758049	0.999059	FALSE
IGHV3.74	HLA-C.R21H_T	-0.161324	-1.78482	0.0758142	0.999059	FALSE
IGHV3.11	HLA-C.E177K_T	-0.371924	-1.78422	0.075911	0.999059	FALSE
IGHV3.43	HLA-DQB1.A86E_A	-0.21213	-1.78414	0.075925	0.999059	FALSE
IGHV3.43	HLA-DQB1.E84Q_A	-0.21213	-1.78414	0.075925	0.999059	FALSE
IGHV3.43	HLA-DQB1.F87L_A	-0.21213	-1.78414	0.075925	0.999059	FALSE
IGHV3.43	HLA-DQB1.G89T_A	-0.21213	-1.78414	0.075925	0.999059	FALSE
IGHV3.43	HLA-DQB1.G125A_A	-0.21213	-1.78414	0.075925	0.999059	FALSE
IGHV3.43	HLA-DQB1.I90T_A	-0.21213	-1.78414	0.075925	0.999059	FALSE
IGHV3.43	HLA-DQB1.Q221H_A	-0.21213	-1.78414	0.075925	0.999059	FALSE
IGHV3.43	HLA-DQB1.Q53L_A	-0.21213	-1.78414	0.075925	0.999059	FALSE
IGHV3.43	HLA-DQB1.R220H_A	-0.21213	-1.78414	0.075925	0.999059	FALSE
IGHV3.43	HLA-DQB1.V85L_A	-0.21213	-1.78414	0.075925	0.999059	FALSE
IGHV5.51	HLA-B.L-7V_T	0.0653565	1.7825	0.0761925	0.999059	FALSE
IGHV4.30.2	HLA-B.C325C_T	-0.0276121	-1.78234	0.0762185	0.999059	FALSE
IGHV2.26	HLA-B.Y116S_T	-0.0145365	-1.78233	0.0762208	0.999059	FALSE
IGHV5.51	HLA-DPB1.F9F_A	0.0736612	1.78116	0.0764114	0.999059	FALSE
IGHV5.51	HLA-DPB1.G11L_T	0.0736612	1.78116	0.0764114	0.999059	FALSE
IGHV5.51	HLA-DPB1.L8V_T	0.0736612	1.78116	0.0764114	0.999059	FALSE
IGHV3.30.3	HLA-C.R219W_A	-0.288125	-1.78053	0.076515	0.999059	FALSE
IGHV3.7	HLA-B.E163L_T	-0.163977	-1.77981	0.0766335	0.999059	FALSE
IGHV3.15	HLA-DQB1.F9Y_A	-0.0106507	-1.77899	0.0767683	0.999059	FALSE
IGHV4.34	HLA-DRB1.F26Y_T	-0.0561429	-1.7787	0.0768163	0.999059	FALSE
IGHV4.4	HLA-B.I66I_A	-0.0691173	-1.77837	0.0768691	0.999059	FALSE
IGHV3.15	HLA-DPA1.A11M_A	0.00867421	1.77761	0.0769946	0.999059	FALSE
IGHV4.34	HLA-DPB1.R96K_A	0.0440611	1.7766	0.0771615	0.999059	FALSE
IGHV4.34	HLA-DPB1.T170I_A	0.0440611	1.7766	0.0771615	0.999059	FALSE
IGHV3.30.3	HLA-DQB1.E74S_T	0.313198	1.77507	0.0774154	0.999059	FALSE
IGHV3.30.3	HLA-DQB1.L26G_T	0.313198	1.77507	0.0774154	0.999059	FALSE
IGHV5.51	HLA-B.Y67C_T	-0.109079	-1.77475	0.0774672	0.999059	FALSE
IGHV3.23	HLA-C.L156R_T	-0.398548	-1.77442	0.0775232	0.999059	FALSE
IGHV4.30.2	HLA-B.C325S_A	-0.027649	-1.77385	0.0776173	0.999059	FALSE
IGHV1.24	HLA-DRB1.D28H_T	-0.0357204	-1.77356	0.0776659	0.999059	FALSE
IGHV1.24	HLA-DRB1.P11D_T	-0.0357204	-1.77356	0.0776659	0.999059	FALSE
IGHV1.24	HLA-DRB1.W9K_T	-0.0357204	-1.77356	0.0776659	0.999059	FALSE
IGHV1.24	HLA-DRB1.Y30G_T	-0.0357204	-1.77356	0.0776659	0.999059	FALSE
IGHV2.70	HLA-C.D9Y_T	0.0354796	1.77333	0.0777039	0.999059	FALSE
IGHV3.21	HLA-C.D9D_T	0.284421	1.77274	0.0778012	0.999059	FALSE
IGHV4.39	HLA-B.A69R_T	0.257087	1.77116	0.0780653	0.999059	FALSE
IGHV4.39	HLA-B.E76V_T	0.257087	1.77116	0.0780653	0.999059	FALSE
IGHV4.39	HLA-B.I66K_T	0.257087	1.77116	0.0780653	0.999059	FALSE
IGHV1.58	HLA-B.Y116F_T	0.0278124	1.76921	0.0783913	0.999059	FALSE
IGHV3.15	HLA-DQA1.A69T_T	0.013055	1.76823	0.0785549	0.999059	FALSE
IGHV3.53	HLA-DQA1.Q129H_A	0.151817	1.76815	0.0785675	0.999059	FALSE
IGHV3.d	HLA-A.H151R_T	0.0132141	1.76753	0.0786713	0.999059	FALSE
IGHV4.b	HLA-DRB1.A71R_A	-0.0113915	-1.76731	0.0787091	0.999059	FALSE
IGHV4.4	HLA-B.D114N_A	-0.0561612	-1.76696	0.0787685	0.999059	FALSE
IGHV3.30	HLA-DPB1.F35L_A	-0.909085	-1.76689	0.07878	0.999059	FALSE
IGHV3.30	HLA-A.T73I_T	-1.59115	-1.76654	0.0788385	0.999059	FALSE
IGHV1.18	HLA-DPB1.M76M_A	0.102155	1.76654	0.078839	0.999059	FALSE
IGHV1.3	HLA-A.F9F_T	-0.133529	-1.76622	0.0788916	0.999059	FALSE
IGHV3.13	HLA-DPB1.A55E_A	0.0799225	1.76616	0.0789022	0.999059	FALSE
IGHV4.61	HLA-C.S116F_T	-0.036753	-1.76558	0.0790006	0.999059	FALSE
IGHV3.49	HLA-DQB1.D57D_A	0.00522764	1.76532	0.0790441	0.999059	FALSE
IGHV1.18	HLA-C.L-14I_A	-0.0970512	-1.76517	0.0790691	0.999059	FALSE
IGHV4.61	HLA-DRB1.A74L_T	-0.0542358	-1.7645	0.0791825	0.999059	FALSE
IGHV4.61	HLA-DRB1.R189S_T	-0.0542358	-1.7645	0.0791825	0.999059	FALSE
IGHV1.45	HLA-A.I298F_T	0.0391584	1.76407	0.0792548	0.999059	FALSE
IGHV1.45	HLA-A.M307R_T	0.0391584	1.76407	0.0792548	0.999059	FALSE
IGHV1.45	HLA-A.S-10L_T	0.0391584	1.76407	0.0792548	0.999059	FALSE
IGHV3.48	HLA-DQB1.L-4L_T	0.434708	1.76403	0.0792617	0.999059	FALSE
IGHV1.f	HLA-C.E275K_T	-0.0113816	-1.76371	0.0793148	0.999059	FALSE
IGHV3.d	HLA-DPB1.K69E_T	0.00909143	1.76357	0.0793389	0.999059	FALSE
IGHV3.NL1	HLA-A.Y99C_T	0.460347	1.76345	0.0793595	0.999059	FALSE
IGHV4.34	HLA-A.D77D_A	0.054375	1.76145	0.0796984	0.999059	FALSE
IGHV4.34	HLA-A.V76V_A	0.054375	1.76145	0.0796984	0.999059	FALSE
IGHV5.51	HLA-DPB1.F35Y_T	0.113286	1.76101	0.0797722	0.999059	FALSE
IGHV3.9	HLA-DQB1.F9Y_A	0.76662	1.76101	0.0797732	0.999059	FALSE
IGHV5.a	HLA-DPA1.K111R_A	0.000866124	1.761	0.0797739	0.999059	FALSE
IGHV5.a	HLA-DPA1.M31Q_A	0.000866124	1.761	0.0797739	0.999059	FALSE
IGHV1.2	HLA-C.T163T_A	-0.104325	-1.76003	0.0799393	0.999059	FALSE
IGHV3.53	HLA-C.A306V_A	0.172085	1.75968	0.0799984	0.999059	FALSE
IGHV3.53	HLA-C.A-16T_A	0.172085	1.75968	0.0799984	0.999059	FALSE
IGHV3.53	HLA-C.C326S_A	0.172085	1.75968	0.0799984	0.999059	FALSE
IGHV3.53	HLA-C.G-8A_A	0.172085	1.75968	0.0799984	0.999059	FALSE
IGHV3.53	HLA-C.M285V_A	0.172085	1.75968	0.0799984	0.999059	FALSE
IGHV3.53	HLA-C.M307V_A	0.172085	1.75968	0.0799984	0.999059	FALSE
IGHV3.53	HLA-C.T305A_A	0.172085	1.75968	0.0799984	0.999059	FALSE
IGHV3.53	HLA-C.T339A_A	0.172085	1.75968	0.0799984	0.999059	FALSE
IGHV3.53	HLA-C.V295A_A	0.172085	1.75968	0.0799984	0.999059	FALSE
IGHV3.30.3	HLA-A.Y99C_T	0.482845	1.75935	0.0800546	0.999059	FALSE
IGHV1.45	HLA-DRB1.A74A_A	0.0255596	1.75902	0.0801103	0.999059	FALSE
IGHV5.51	HLA-B.Y67S_A	-0.0648482	-1.75709	0.0804411	0.999059	FALSE
IGHV4.31	HLA-DQB1.A-26S_T	-0.000974307	-1.75675	0.0804991	0.999059	FALSE
IGHV4.31	HLA-DQB1.G125S_T	-0.000974307	-1.75675	0.0804991	0.999059	FALSE
IGHV4.31	HLA-DQB1.L-4S_T	-0.000974307	-1.75675	0.0804991	0.999059	FALSE
IGHV4.31	HLA-DQB1.M-8I_T	-0.000974307	-1.75675	0.0804991	0.999059	FALSE
IGHV4.31	HLA-DQB1.M14L_T	-0.000974307	-1.75675	0.0804991	0.999059	FALSE
IGHV4.31	HLA-DQB1.Q224R_T	-0.000974307	-1.75675	0.0804991	0.999059	FALSE
IGHV4.31	HLA-DQB1.T71A_T	-0.000974307	-1.75675	0.0804991	0.999059	FALSE
IGHV4.31	HLA-DQB1.V116I_T	-0.000974307	-1.75675	0.0804991	0.999059	FALSE
IGHV5.a	HLA-A.N127K_T	0.000891281	1.75639	0.0805596	0.999059	FALSE
IGHV3.NL1	HLA-DPA1.A11M_A	-0.273608	-1.75627	0.0805799	0.999059	FALSE
IGHV5.a	HLA-DQB1.F9Y_A	-0.00104182	-1.75585	0.0806522	0.999059	FALSE
IGHV4.30.2	HLA-DRB1.A74L_T	-0.0499694	-1.75575	0.0806698	0.999059	FALSE
IGHV4.30.2	HLA-DRB1.R189S_T	-0.0499694	-1.75575	0.0806698	0.999059	FALSE
IGHV3.53	HLA-B.G83R_T	0.148402	1.75559	0.0806962	0.999059	FALSE
IGHV3.53	HLA-B.N80N_A	0.148402	1.75559	0.0806962	0.999059	FALSE
IGHV3.53	HLA-B.R82L_T	0.148402	1.75559	0.0806962	0.999059	FALSE
IGHV3.30	HLA-A.A149T_T	1.60219	1.75557	0.0806997	0.999059	FALSE
IGHV2.70	HLA-A.S105P_T	0.0376058	1.7555	0.0807123	0.999059	FALSE
IGHV3.43	HLA-B.T143S_T	-0.260678	-1.75541	0.0807279	0.999059	FALSE
IGHV3.43	HLA-B.W147L_T	-0.260678	-1.75541	0.0807279	0.999059	FALSE
IGHV3.49	HLA-B.I66I_A	0.00610862	1.75523	0.0807594	0.999059	FALSE
IGHV3.72	HLA-A.S105P_T	-0.00194159	-1.75493	0.0808105	0.999059	FALSE
IGHV3.74	HLA-DRB1.S37L_T	0.215262	1.7543	0.0809177	0.999059	FALSE
IGHV3.74	HLA-DRB1.V85A_T	0.215262	1.7543	0.0809177	0.999059	FALSE
IGHV3.74	HLA-DRB1.V38L_T	0.215262	1.7543	0.0809177	0.999059	FALSE
IGHV3.74	HLA-DPA1.A11M_A	0.152681	1.75427	0.0809241	0.999059	FALSE
IGHV4.4	HLA-B.L95I_T	-0.0627732	-1.75246	0.0812345	0.999059	FALSE
IGHV3.21	HLA-DQB1.R55P_T	0.256319	1.75169	0.0813681	0.999059	FALSE
IGHV1.18	HLA-DQB1.A86E_A	-0.0867946	-1.75059	0.0815574	0.999059	FALSE
IGHV1.18	HLA-DQB1.E84Q_A	-0.0867946	-1.75059	0.0815574	0.999059	FALSE
IGHV1.18	HLA-DQB1.F87L_A	-0.0867946	-1.75059	0.0815574	0.999059	FALSE
IGHV1.18	HLA-DQB1.G89T_A	-0.0867946	-1.75059	0.0815574	0.999059	FALSE
IGHV1.18	HLA-DQB1.G125A_A	-0.0867946	-1.75059	0.0815574	0.999059	FALSE
IGHV1.18	HLA-DQB1.I90T_A	-0.0867946	-1.75059	0.0815574	0.999059	FALSE
IGHV1.18	HLA-DQB1.Q221H_A	-0.0867946	-1.75059	0.0815574	0.999059	FALSE
IGHV1.18	HLA-DQB1.Q53L_A	-0.0867946	-1.75059	0.0815574	0.999059	FALSE
IGHV1.18	HLA-DQB1.R220H_A	-0.0867946	-1.75059	0.0815574	0.999059	FALSE
IGHV1.18	HLA-DQB1.V85L_A	-0.0867946	-1.75059	0.0815574	0.999059	FALSE
IGHV1.58	HLA-DRB1.A-15A_A	0.0168407	1.75012	0.0816396	0.999059	FALSE
IGHV1.58	HLA-DRB1.A-15V_T	0.0168407	1.75012	0.0816396	0.999059	FALSE
IGHV1.58	HLA-DRB1.K-24R_T	0.0168407	1.75012	0.0816396	0.999059	FALSE
IGHV3.21	HLA-B.K178T_A	0.2949	1.74999	0.0816606	0.999059	FALSE
IGHV3.48	HLA-DPB1.K69E_T	-0.248458	-1.74774	0.0820523	0.999059	FALSE
IGHV3.48	HLA-DQB1.S-5T_A	0.257635	1.74768	0.0820611	0.999059	FALSE
IGHV3.20	HLA-DPB1.I65L_T	-0.125	-1.74768	0.0820621	0.999059	FALSE
IGHV1.f	HLA-DQB1.G125G_T	-0.00633217	-1.74758	0.0820789	0.999059	FALSE
IGHV1.24	HLA-B.D114N_A	0.0277034	1.74726	0.0821351	0.999059	FALSE
IGHV1.24	HLA-C.E173K_T	0.0307188	1.7469	0.0821978	0.999059	FALSE
IGHV1.24	HLA-C.L103V_T	0.0307188	1.7469	0.0821978	0.999059	FALSE
IGHV1.24	HLA-C.T163L_T	0.0307188	1.7469	0.0821978	0.999059	FALSE
IGHV1.18	HLA-B.E163T_T	-0.109551	-1.74639	0.0822866	0.999059	FALSE
IGHV4.b	HLA-DQA1.A45V_A	-0.0101885	-1.74571	0.0824041	0.999059	FALSE
IGHV4.b	HLA-DQA1.A69A_T	-0.0101885	-1.74571	0.0824041	0.999059	FALSE
IGHV4.b	HLA-DQA1.C11Y_A	-0.0101885	-1.74571	0.0824041	0.999059	FALSE
IGHV4.b	HLA-DQA1.E50E_T	-0.0101885	-1.74571	0.0824041	0.999059	FALSE
IGHV4.b	HLA-DQA1.F18S_A	-0.0101885	-1.74571	0.0824041	0.999059	FALSE
IGHV4.b	HLA-DQA1.G55R_A	-0.0101885	-1.74571	0.0824041	0.999059	FALSE
IGHV4.b	HLA-DQA1.G61F_A	-0.0101885	-1.74571	0.0824041	0.999059	FALSE
IGHV4.b	HLA-DQA1.K53K_T	-0.0101885	-1.74571	0.0824041	0.999059	FALSE
IGHV4.b	HLA-DQA1.M66I_A	-0.0101885	-1.74571	0.0824041	0.999059	FALSE
IGHV4.b	HLA-DQA1.M76M_T	-0.0101885	-1.74571	0.0824041	0.999059	FALSE
IGHV4.b	HLA-DQA1.Q175Q_T	-0.0101885	-1.74571	0.0824041	0.999059	FALSE
IGHV4.b	HLA-DQA1.Q218R_A	-0.0101885	-1.74571	0.0824041	0.999059	FALSE
IGHV4.b	HLA-DQA1.R47R_T	-0.0101885	-1.74571	0.0824041	0.999059	FALSE
IGHV4.b	HLA-DQA1.R64T_A	-0.0101885	-1.74571	0.0824041	0.999059	FALSE
IGHV4.b	HLA-DQA1.S52S_T	-0.0101885	-1.74571	0.0824041	0.999059	FALSE
IGHV4.b	HLA-DQA1.W48L_A	-0.0101885	-1.74571	0.0824041	0.999059	FALSE
IGHV4.b	HLA-DQA1.Y80S_A	-0.0101885	-1.74571	0.0824041	0.999059	FALSE
IGHV3.20	HLA-C.E177K_T	0.0971242	1.74526	0.0824832	0.999059	FALSE
IGHV7.4.1	HLA-DQB1.E74E_A	-0.0606804	-1.74526	0.0824838	0.999059	FALSE
IGHV7.4.1	HLA-DQB1.L75V_T	-0.0606804	-1.74526	0.0824838	0.999059	FALSE
IGHV7.4.1	HLA-DQB1.T71T_A	-0.0606804	-1.74526	0.0824838	0.999059	FALSE
IGHV1.24	HLA-DRB1.T-16A_A	0.0340722	1.74507	0.082517	0.999059	FALSE
IGHV4.30.2	HLA-DPB1.M76V_T	0.0502382	1.74458	0.0826013	0.999059	FALSE
IGHV3.43	HLA-C.A11A_A	0.219697	1.7444	0.082633	0.999059	FALSE
IGHV3.43	HLA-C.A11S_T	0.219697	1.7444	0.082633	0.999059	FALSE
IGHV3.48	HLA-A.I97M_T	-0.256848	-1.74428	0.0826545	0.999059	FALSE
IGHV3.74	HLA-DQA1.D2G_T	-0.235819	-1.74384	0.082731	0.999059	FALSE
IGHV3.74	HLA-DQA1.V-6M_T	-0.235819	-1.74384	0.082731	0.999059	FALSE
IGHV6.1	HLA-DQB1.Y30Y_A	0.0722032	1.74376	0.0827446	0.999059	FALSE
IGHV3.48	HLA-A.D74H_T	0.264101	1.74123	0.0831886	0.999059	FALSE
IGHV3.48	HLA-A.G107W_T	0.264101	1.74123	0.0831886	0.999059	FALSE
IGHV3.48	HLA-A.Q62G_T	0.264101	1.74123	0.0831886	0.999059	FALSE
IGHV1.2	HLA-C.R219W_A	0.0927216	1.741	0.0832286	0.999059	FALSE
IGHV3.9	HLA-DPB1.K69E_T	-0.619683	-1.74095	0.0832382	0.999059	FALSE
IGHV3.49	HLA-DRB1.P11V_T	-0.00799825	-1.74057	0.0833056	0.999059	FALSE
IGHV3.49	HLA-DRB1.S120N_T	-0.00799825	-1.74057	0.0833056	0.999059	FALSE
IGHV4.61	HLA-B.D74Y_A	0.0310245	1.74038	0.0833382	0.999059	FALSE
IGHV4.30.4	HLA-C.D9S_T	0.0045785	1.74001	0.0834026	0.999059	FALSE
IGHV1.24	HLA-DQA1.M76L_T	0.0300062	1.73968	0.0834612	0.999059	FALSE
IGHV3.9	HLA-A.S105P_T	0.643334	1.73917	0.0835515	0.999059	FALSE
IGHV3.20	HLA-DPB1.M76V_T	-0.120141	-1.73857	0.0836571	0.999059	FALSE
IGHV1.24	HLA-C.T163T_A	0.0298252	1.73845	0.0836776	0.999059	FALSE
IGHV3.66	HLA-DQB1.G70E_T	0.182848	1.73812	0.0837372	0.999059	FALSE
IGHV3.66	HLA-DQB1.P56L_T	0.182848	1.73812	0.0837372	0.999059	FALSE
IGHV3.66	HLA-DQB1.T71D_T	0.182848	1.73812	0.0837372	0.999059	FALSE
IGHV1.18	HLA-C.S99S_T	-0.105227	-1.73799	0.08376	0.999059	FALSE
IGHV3.15	HLA-DRB1.A71A_T	-0.0109852	-1.73794	0.0837684	0.999059	FALSE
IGHV4.b	HLA-DQA1.Q175E_T	0.00990895	1.73666	0.0839941	0.999059	FALSE
IGHV3.66	HLA-DPB1.F35F_T	0.0855399	1.73662	0.084002	0.999059	FALSE
IGHV5.a	HLA-C.E275E_A	0.00105946	1.73581	0.084145	0.999059	FALSE
IGHV2.5	HLA-B.T143S_T	0.0302572	1.73562	0.0841796	0.999059	FALSE
IGHV2.5	HLA-B.W147L_T	0.0302572	1.73562	0.0841796	0.999059	FALSE
IGHV3.15	HLA-DQB1.G13A_T	0.00874741	1.73533	0.0842305	0.999059	FALSE
IGHV3.15	HLA-DQB1.L26Y_T	0.00874741	1.73533	0.0842305	0.999059	FALSE
IGHV3.15	HLA-DQB1.R167H_T	0.00874741	1.73533	0.0842305	0.999059	FALSE
IGHV4.b	HLA-DQB1.R55R_T	-0.0101638	-1.73504	0.084282	0.999059	FALSE
IGHV1.24	HLA-DQB1.F9F_T	-0.0442075	-1.73373	0.0845143	0.999059	FALSE
IGHV5.a	HLA-C.S116F_T	0.00102994	1.73354	0.0845489	0.999059	FALSE
IGHV4.b	HLA-DQA1.A160A_A	0.0114359	1.73266	0.0847048	0.999059	FALSE
IGHV1.45	HLA-A.E63E_A	0.0364269	1.73118	0.0849694	0.999059	FALSE
IGHV3.33	HLA-C.T163T_A	0.651032	1.73077	0.0850422	0.999059	FALSE
IGHV7.4.1	HLA-A.D77N_T	0.0663835	1.7301	0.0851621	0.999059	FALSE
IGHV5.a	HLA-A.D116Y_T	0.000874192	1.7296	0.0852516	0.999059	FALSE
IGHV5.a	HLA-A.I95I_A	0.000874192	1.7296	0.0852516	0.999059	FALSE
IGHV5.a	HLA-A.N66K_T	0.000874192	1.7296	0.0852516	0.999059	FALSE
IGHV5.a	HLA-A.R114H_T	0.000874192	1.7296	0.0852516	0.999059	FALSE
IGHV4.30.2	HLA-DQB1.F9Y_A	-0.0333067	-1.72957	0.0852584	0.999059	FALSE
IGHV4.34	HLA-A.D77N_T	0.0534643	1.72946	0.0852783	0.999059	FALSE
IGHV3.30	HLA-A.R114Q_T	-1.35439	-1.72879	0.0853971	0.999059	FALSE
IGHV3.d	HLA-A.D74H_T	-0.00951064	-1.72874	0.0854074	0.999059	FALSE
IGHV3.d	HLA-A.G107W_T	-0.00951064	-1.72874	0.0854074	0.999059	FALSE
IGHV3.d	HLA-A.Q62G_T	-0.00951064	-1.72874	0.0854074	0.999059	FALSE
IGHV3.9	HLA-DQB1.L-4L_T	1.06688	1.72866	0.0854203	0.999059	FALSE
IGHV4.61	HLA-DQB1.D57D_A	0.0309937	1.72786	0.085565	0.999059	FALSE
IGHV3.15	HLA-DPB1.A36V_A	-0.0105237	-1.72779	0.0855768	0.999059	FALSE
IGHV3.15	HLA-DPB1.A55A_T	-0.0105237	-1.72779	0.0855768	0.999059	FALSE
IGHV3.49	HLA-B.Y116S_T	0.00496049	1.72716	0.0856908	0.999059	FALSE
IGHV3.7	HLA-B.Y67Y_T	-0.183062	-1.72714	0.0856943	0.999059	FALSE
IGHV1.18	HLA-A.P184A_T	-0.0874973	-1.7269	0.085738	0.999059	FALSE
IGHV4.b	HLA-DQB1.T185I_T	0.0109889	1.72687	0.0857435	0.999059	FALSE
IGHV3.21	HLA-C.A152E_A	0.255003	1.72644	0.0858206	0.999059	FALSE
IGHV4.30.2	HLA-B.V282I_A	-0.0261612	-1.72643	0.0858215	0.999059	FALSE
IGHV1.3	HLA-A.G79R_T	0.162715	1.72587	0.0859238	0.999059	FALSE
IGHV1.3	HLA-A.G83R_T	0.162715	1.72587	0.0859238	0.999059	FALSE
IGHV1.3	HLA-A.L81A_T	0.162715	1.72587	0.0859238	0.999059	FALSE
IGHV1.3	HLA-A.R82L_T	0.162715	1.72587	0.0859238	0.999059	FALSE
IGHV1.3	HLA-A.T80I_T	0.162715	1.72587	0.0859238	0.999059	FALSE
IGHV1.3	HLA-A.V76E_T	0.162715	1.72587	0.0859238	0.999059	FALSE
IGHV4.4	HLA-DRB1.A74L_T	-0.0978784	-1.72575	0.0859451	0.999059	FALSE
IGHV4.4	HLA-DRB1.R189S_T	-0.0978784	-1.72575	0.0859451	0.999059	FALSE
IGHV3.21	HLA-A.N127K_T	-0.254219	-1.72539	0.0860088	0.999059	FALSE
IGHV3.43	HLA-B.S97R_A	0.222802	1.72532	0.0860224	0.999059	FALSE
IGHV1.f	HLA-B.Y116F_T	0.00852572	1.72467	0.086139	0.999059	FALSE
IGHV5.a	HLA-C.D114N_T	0.00105039	1.72448	0.0861736	0.999059	FALSE
IGHV3.33	HLA-DRB1.Q96Q_T	0.737504	1.72422	0.0862208	0.999059	FALSE
IGHV4.30.4	HLA-B.R156W_T	0.00285501	1.72399	0.0862633	0.999059	FALSE
IGHV3.30.3	HLA-C.T163T_A	0.310621	1.72355	0.0863417	0.999059	FALSE
IGHV4.30.2	HLA-B.A305T_A	-0.0263435	-1.72303	0.0864361	0.999059	FALSE
IGHV4.30.2	HLA-B.K178T_A	-0.0324626	-1.72291	0.0864585	0.999059	FALSE
IGHV3.11	HLA-A.I298F_T	0.375049	1.72243	0.0865458	0.999059	FALSE
IGHV3.11	HLA-A.M307R_T	0.375049	1.72243	0.0865458	0.999059	FALSE
IGHV3.11	HLA-A.S-10L_T	0.375049	1.72243	0.0865458	0.999059	FALSE
IGHV4.61	HLA-B.A69T_A	0.0308199	1.72183	0.0866539	0.999059	FALSE
IGHV4.61	HLA-B.A71A_T	0.0308199	1.72183	0.0866539	0.999059	FALSE
IGHV4.61	HLA-B.A71T_A	0.0308199	1.72183	0.0866539	0.999059	FALSE
IGHV4.61	HLA-B.Q70N_A	0.0308199	1.72183	0.0866539	0.999059	FALSE
IGHV3.15	HLA-DRB1.Q96H_A	-0.00963077	-1.72178	0.0866624	0.999059	FALSE
IGHV4.b	HLA-DQA1.A187A_A	0.0110807	1.72124	0.086762	0.999059	FALSE
IGHV4.b	HLA-DQA1.A187T_T	0.0110807	1.72124	0.086762	0.999059	FALSE
IGHV4.b	HLA-DQA1.G56R_T	0.0110807	1.72124	0.086762	0.999059	FALSE
IGHV4.b	HLA-DQA1.M76V_T	0.0110807	1.72124	0.086762	0.999059	FALSE
IGHV4.b	HLA-DQA1.R47Q_T	0.0110807	1.72124	0.086762	0.999059	FALSE
IGHV4.b	HLA-DQA1.T26S_T	0.0110807	1.72124	0.086762	0.999059	FALSE
IGHV1.46	HLA-B.S24A_A	0.037013	1.72095	0.0868139	0.999059	FALSE
IGHV4.59	HLA-DRB1.D28D_A	0.0566468	1.72048	0.0868998	0.999059	FALSE
IGHV4.59	HLA-DRB1.Y30Y_A	0.0566468	1.72048	0.0868998	0.999059	FALSE
IGHV1.2	HLA-A.I97M_T	-0.0963161	-1.72002	0.0869835	0.999059	FALSE
IGHV4.31	HLA-DRB1.I67I_T	0.000828839	1.71989	0.0870075	0.999059	FALSE
IGHV4.34	HLA-DPB1.F35F_T	0.0465156	1.71872	0.0872211	0.999059	FALSE
IGHV1.24	HLA-C.A306V_A	-0.0327363	-1.71869	0.0872256	0.999059	FALSE
IGHV1.24	HLA-C.A-16T_A	-0.0327363	-1.71869	0.0872256	0.999059	FALSE
IGHV1.24	HLA-C.C326S_A	-0.0327363	-1.71869	0.0872256	0.999059	FALSE
IGHV1.24	HLA-C.G-8A_A	-0.0327363	-1.71869	0.0872256	0.999059	FALSE
IGHV1.24	HLA-C.M285V_A	-0.0327363	-1.71869	0.0872256	0.999059	FALSE
IGHV1.24	HLA-C.M307V_A	-0.0327363	-1.71869	0.0872256	0.999059	FALSE
IGHV1.24	HLA-C.T305A_A	-0.0327363	-1.71869	0.0872256	0.999059	FALSE
IGHV1.24	HLA-C.T339A_A	-0.0327363	-1.71869	0.0872256	0.999059	FALSE
IGHV1.24	HLA-C.V295A_A	-0.0327363	-1.71869	0.0872256	0.999059	FALSE
IGHV3.13	HLA-DRB1.S37F_T	0.143984	1.71838	0.0872829	0.999059	FALSE
IGHV1.58	HLA-DPB1.F35Y_T	0.0282817	1.71829	0.0872984	0.999059	FALSE
IGHV4.61	HLA-DQB1.A-26S_T	0.0343142	1.71809	0.0873362	0.999059	FALSE
IGHV4.61	HLA-DQB1.G125S_T	0.0343142	1.71809	0.0873362	0.999059	FALSE
IGHV4.61	HLA-DQB1.L-4S_T	0.0343142	1.71809	0.0873362	0.999059	FALSE
IGHV4.61	HLA-DQB1.M-8I_T	0.0343142	1.71809	0.0873362	0.999059	FALSE
IGHV4.61	HLA-DQB1.M14L_T	0.0343142	1.71809	0.0873362	0.999059	FALSE
IGHV4.61	HLA-DQB1.Q224R_T	0.0343142	1.71809	0.0873362	0.999059	FALSE
IGHV4.61	HLA-DQB1.T71A_T	0.0343142	1.71809	0.0873362	0.999059	FALSE
IGHV4.61	HLA-DQB1.V116I_T	0.0343142	1.71809	0.0873362	0.999059	FALSE
IGHV3.15	HLA-DQA1.M207V_A	-0.0101462	-1.71763	0.0874205	0.999059	FALSE
IGHV1.3	HLA-DQB1.A86E_A	-0.124641	-1.71669	0.0875913	0.999059	FALSE
IGHV1.3	HLA-DQB1.E84Q_A	-0.124641	-1.71669	0.0875913	0.999059	FALSE
IGHV1.3	HLA-DQB1.F87L_A	-0.124641	-1.71669	0.0875913	0.999059	FALSE
IGHV1.3	HLA-DQB1.G89T_A	-0.124641	-1.71669	0.0875913	0.999059	FALSE
IGHV1.3	HLA-DQB1.G125A_A	-0.124641	-1.71669	0.0875913	0.999059	FALSE
IGHV1.3	HLA-DQB1.I90T_A	-0.124641	-1.71669	0.0875913	0.999059	FALSE
IGHV1.3	HLA-DQB1.Q221H_A	-0.124641	-1.71669	0.0875913	0.999059	FALSE
IGHV1.3	HLA-DQB1.Q53L_A	-0.124641	-1.71669	0.0875913	0.999059	FALSE
IGHV1.3	HLA-DQB1.R220H_A	-0.124641	-1.71669	0.0875913	0.999059	FALSE
IGHV1.3	HLA-DQB1.V85L_A	-0.124641	-1.71669	0.0875913	0.999059	FALSE
IGHV4.61	HLA-C.A152A_T	-0.0356332	-1.71634	0.0876561	0.999059	FALSE
IGHV4.61	HLA-C.L147W_A	-0.0356332	-1.71634	0.0876561	0.999059	FALSE
IGHV4.61	HLA-C.L194V_A	-0.0356332	-1.71634	0.0876561	0.999059	FALSE
IGHV4.61	HLA-C.M261V_A	-0.0356332	-1.71634	0.0876561	0.999059	FALSE
IGHV4.61	HLA-C.P184H_A	-0.0356332	-1.71634	0.0876561	0.999059	FALSE
IGHV4.61	HLA-C.Q253E_A	-0.0356332	-1.71634	0.0876561	0.999059	FALSE
IGHV4.61	HLA-C.Q267P_A	-0.0356332	-1.71634	0.0876561	0.999059	FALSE
IGHV4.61	HLA-C.S273R_A	-0.0356332	-1.71634	0.0876561	0.999059	FALSE
IGHV3.23	HLA-DRB1.R4Q_T	0.438837	1.71576	0.0877623	0.999059	FALSE
IGHV3.23	HLA-DRB1.R4R_A	0.438837	1.71576	0.0877623	0.999059	FALSE
IGHV3.23	HLA-DRB1.Y78V_T	0.438837	1.71576	0.0877623	0.999059	FALSE
IGHV3.23	HLA-DRB1.Y78Y_A	0.438837	1.71576	0.0877623	0.999059	FALSE
IGHV3.23	HLA-C.A306V_A	0.455103	1.71351	0.0881751	0.999059	FALSE
IGHV3.23	HLA-C.A-16T_A	0.455103	1.71351	0.0881751	0.999059	FALSE
IGHV3.23	HLA-C.C326S_A	0.455103	1.71351	0.0881751	0.999059	FALSE
IGHV3.23	HLA-C.G-8A_A	0.455103	1.71351	0.0881751	0.999059	FALSE
IGHV3.23	HLA-C.M285V_A	0.455103	1.71351	0.0881751	0.999059	FALSE
IGHV3.23	HLA-C.M307V_A	0.455103	1.71351	0.0881751	0.999059	FALSE
IGHV3.23	HLA-C.T305A_A	0.455103	1.71351	0.0881751	0.999059	FALSE
IGHV3.23	HLA-C.T339A_A	0.455103	1.71351	0.0881751	0.999059	FALSE
IGHV3.23	HLA-C.V295A_A	0.455103	1.71351	0.0881751	0.999059	FALSE
IGHV3.23	HLA-DRB1.K98E_T	0.390663	1.71344	0.0881885	0.999059	FALSE
IGHV3.23	HLA-DRB1.S104A_T	0.390663	1.71344	0.0881885	0.999059	FALSE
IGHV4.59	HLA-DRB1.F26F_A	0.0580089	1.71331	0.088212	0.999059	FALSE
IGHV1.f	HLA-DPB1.A55D_T	0.0055478	1.71266	0.0883318	0.999059	FALSE
IGHV1.f	HLA-DPB1.A56E_T	0.0055478	1.71266	0.0883318	0.999059	FALSE
IGHV3.64	HLA-DRB1.A71A_T	-0.149232	-1.71259	0.0883449	0.999059	FALSE
IGHV7.4.1	HLA-DQB1.Y30Y_A	-0.0613989	-1.71245	0.0883706	0.999059	FALSE
IGHV3.23	HLA-DPB1.I65L_T	0.706768	1.71084	0.0886686	0.999059	FALSE
IGHV3.74	HLA-B.E45M_T	0.147453	1.71024	0.0887809	0.999059	FALSE
IGHV3.74	HLA-B.E46A_T	0.147453	1.71024	0.0887809	0.999059	FALSE
IGHV3.13	HLA-C.V304M_T	0.0931946	1.70893	0.0890226	0.999059	FALSE
IGHV3.13	HLA-C.V304V_A	0.0931946	1.70893	0.0890226	0.999059	FALSE
IGHV1.3	HLA-A.I95V_T	-0.131863	-1.70892	0.0890241	0.999059	FALSE
IGHV3.33	HLA-C.R21H_T	0.606925	1.7084	0.0891205	0.999059	FALSE
IGHV2.70	HLA-A.L-14V_T	-0.0373826	-1.7068	0.0894184	0.999059	FALSE
IGHV3.64	HLA-DQB1.F9Y_A	-0.140913	-1.70662	0.0894533	0.999059	FALSE
IGHV1.3	HLA-DQA1.E40G_T	0.140948	1.70657	0.0894626	0.999059	FALSE
IGHV1.3	HLA-DQA1.E50V_T	0.140948	1.70657	0.0894626	0.999059	FALSE
IGHV1.3	HLA-DQA1.F51L_T	0.140948	1.70657	0.0894626	0.999059	FALSE
IGHV1.3	HLA-DQA1.K53Q_T	0.140948	1.70657	0.0894626	0.999059	FALSE
IGHV1.3	HLA-DQA1.R47C_T	0.140948	1.70657	0.0894626	0.999059	FALSE
IGHV5.51	HLA-B.E45E_T	-0.0795227	-1.70635	0.0895025	0.999059	FALSE
IGHV1.24	HLA-DRB1.F26F_A	-0.0268108	-1.70619	0.0895321	0.999059	FALSE
IGHV2.70	HLA-A.F9Y_T	0.0357264	1.70582	0.0896018	0.999059	FALSE
IGHV3.21	HLA-C.A306V_A	0.292509	1.70564	0.0896351	0.999059	FALSE
IGHV3.21	HLA-C.A-16T_A	0.292509	1.70564	0.0896351	0.999059	FALSE
IGHV3.21	HLA-C.C326S_A	0.292509	1.70564	0.0896351	0.999059	FALSE
IGHV3.21	HLA-C.G-8A_A	0.292509	1.70564	0.0896351	0.999059	FALSE
IGHV3.21	HLA-C.M285V_A	0.292509	1.70564	0.0896351	0.999059	FALSE
IGHV3.21	HLA-C.M307V_A	0.292509	1.70564	0.0896351	0.999059	FALSE
IGHV3.21	HLA-C.T305A_A	0.292509	1.70564	0.0896351	0.999059	FALSE
IGHV3.21	HLA-C.T339A_A	0.292509	1.70564	0.0896351	0.999059	FALSE
IGHV3.21	HLA-C.V295A_A	0.292509	1.70564	0.0896351	0.999059	FALSE
IGHV3.21	HLA-DQB1.S-5T_A	-0.249048	-1.70501	0.0897525	0.999059	FALSE
IGHV3.7	HLA-A.Y99C_T	-0.274885	-1.70479	0.089794	0.999059	FALSE
IGHV3.23	HLA-C.A11A_A	-0.394298	-1.70447	0.0898549	0.999059	FALSE
IGHV3.23	HLA-C.A11S_T	-0.394298	-1.70447	0.0898549	0.999059	FALSE
IGHV3.30	HLA-C.S116S_T	-0.928799	-1.70433	0.0898794	0.999059	FALSE
IGHV1.24	HLA-B.A69A_T	0.0353719	1.70423	0.0898988	0.999059	FALSE
IGHV3.15	HLA-DQA1.Q129H_A	-0.00891886	-1.70353	0.0900304	0.999059	FALSE
IGHV3.43	HLA-DRB1.R4Q_T	0.23727	1.70318	0.0900947	0.999059	FALSE
IGHV3.43	HLA-DRB1.R4R_A	0.23727	1.70318	0.0900947	0.999059	FALSE
IGHV3.43	HLA-DRB1.Y78V_T	0.23727	1.70318	0.0900947	0.999059	FALSE
IGHV3.43	HLA-DRB1.Y78Y_A	0.23727	1.70318	0.0900947	0.999059	FALSE
IGHV3.66	HLA-C.L156R_T	0.0846143	1.70185	0.0903444	0.999059	FALSE
IGHV4.b	HLA-DRB1.Y32H_T	-0.0109262	-1.7018	0.0903548	0.999059	FALSE
IGHV1.46	HLA-DRB1.A74L_T	-0.0681821	-1.70163	0.0903862	0.999059	FALSE
IGHV1.46	HLA-DRB1.R189S_T	-0.0681821	-1.70163	0.0903862	0.999059	FALSE
IGHV3.74	HLA-DRB1.Y30H_T	0.205966	1.70163	0.0903868	0.999059	FALSE
IGHV3.9	HLA-B.Y116F_T	-1.00349	-1.70123	0.090462	0.999059	FALSE
IGHV2.5	HLA-C.D114N_T	0.0297823	1.70101	0.0905034	0.999059	FALSE
IGHV1.2	HLA-A.R114Q_T	-0.133362	-1.70067	0.0905679	0.999059	FALSE
IGHV4.28	HLA-DQB1.A86A_T	-0.00440831	-1.70056	0.0905879	0.999059	FALSE
IGHV4.30.4	HLA-DRB1.D28E_T	0.00294096	1.70022	0.0906522	0.999059	FALSE
IGHV3.13	HLA-A.E152V_T	0.0824689	1.70014	0.0906673	0.999059	FALSE
IGHV7.4.1	HLA-DQA1.A199T_T	-0.0969344	-1.69888	0.0909042	0.999059	FALSE
IGHV3.13	HLA-DQB1.F9Y_A	-0.0981739	-1.69877	0.0909255	0.999059	FALSE
IGHV3.49	HLA-DQB1.A-9S_T	0.00828106	1.69826	0.0910212	0.999059	FALSE
IGHV3.49	HLA-DQB1.E74A_T	0.00828106	1.69826	0.0910212	0.999059	FALSE
IGHV3.49	HLA-DQB1.P52L_T	0.00828106	1.69826	0.0910212	0.999059	FALSE
IGHV3.49	HLA-DQB1.R55L_T	0.00828106	1.69826	0.0910212	0.999059	FALSE
IGHV3.49	HLA-DQB1.T71K_T	0.00828106	1.69826	0.0910212	0.999059	FALSE
IGHV3.49	HLA-DQB1.T28S_T	0.00828106	1.69826	0.0910212	0.999059	FALSE
IGHV3.49	HLA-DQB1.V46E_T	0.00828106	1.69826	0.0910212	0.999059	FALSE
IGHV3.49	HLA-DQB1.Y30S_T	0.00828106	1.69826	0.0910212	0.999059	FALSE
IGHV3.49	HLA-DQB1.Y37I_T	0.00828106	1.69826	0.0910212	0.999059	FALSE
IGHV3.49	HLA-DQB1.Y47F_T	0.00828106	1.69826	0.0910212	0.999059	FALSE
IGHV3.49	HLA-DQB1.Y47Y_A	0.00828106	1.69826	0.0910212	0.999059	FALSE
IGHV4.31	HLA-DQB1.Y30H_T	-0.000927002	-1.69763	0.0911408	0.999059	FALSE
IGHV4.39	HLA-DPB1.A55E_A	0.166364	1.69756	0.0911541	0.999059	FALSE
IGHV1.3	HLA-DRB1.T77N_T	-0.236381	-1.69727	0.0912091	0.999059	FALSE
IGHV3.11	HLA-C.A152T_T	-0.356049	-1.69726	0.0912115	0.999059	FALSE
IGHV3.11	HLA-C.E275G_T	-0.356049	-1.69726	0.0912115	0.999059	FALSE
IGHV3.11	HLA-C.R35Q_T	-0.356049	-1.69726	0.0912115	0.999059	FALSE
IGHV3.11	HLA-C.R35R_A	-0.356049	-1.69726	0.0912115	0.999059	FALSE
IGHV1.3	HLA-A.I282V_T	0.160591	1.69712	0.0912374	0.999059	FALSE
IGHV1.3	HLA-A.K311N_T	0.160591	1.69712	0.0912374	0.999059	FALSE
IGHV1.3	HLA-A.Q62E_T	0.160591	1.69712	0.0912374	0.999059	FALSE
IGHV1.3	HLA-A.R65G_T	0.160591	1.69712	0.0912374	0.999059	FALSE
IGHV1.3	HLA-A.Y99F_T	0.160591	1.69712	0.0912374	0.999059	FALSE
IGHV3.11	HLA-A.I97M_T	0.24874	1.69608	0.0914336	0.999059	FALSE
IGHV5.a	HLA-DQB1.D57S_T	0.00110531	1.69587	0.0914752	0.999059	FALSE
IGHV5.a	HLA-DQB1.Q126H_T	0.00110531	1.69587	0.0914752	0.999059	FALSE
IGHV1.f	HLA-B.L95L_A	0.00510634	1.69444	0.0917469	0.999059	FALSE
IGHV1.69	HLA-B.A69R_T	-0.143732	-1.69435	0.0917638	0.999059	FALSE
IGHV1.69	HLA-B.E76V_T	-0.143732	-1.69435	0.0917638	0.999059	FALSE
IGHV1.69	HLA-B.I66K_T	-0.143732	-1.69435	0.0917638	0.999059	FALSE
IGHV3.21	HLA-DPB1.F35Y_T	0.4138	1.69427	0.091778	0.999059	FALSE
IGHV1.3	HLA-DQA1.M76L_T	0.135394	1.69312	0.0919976	0.999059	FALSE
IGHV7.4.1	HLA-DQA1.D2G_T	-0.0863005	-1.69284	0.0920502	0.999059	FALSE
IGHV7.4.1	HLA-DQA1.V-6M_T	-0.0863005	-1.69284	0.0920502	0.999059	FALSE
IGHV7.4.1	HLA-B.E163L_T	0.0531935	1.6919	0.09223	0.999059	FALSE
IGHV1.f	HLA-DRB1.P11V_T	0.00826274	1.69141	0.0923238	0.999059	FALSE
IGHV1.f	HLA-DRB1.S120N_T	0.00826274	1.69141	0.0923238	0.999059	FALSE
IGHV3.66	HLA-C.L156L_A	0.0786517	1.69115	0.0923743	0.999059	FALSE
IGHV3.13	HLA-DRB1.H16H_A	-0.09511	-1.6911	0.0923838	0.999059	FALSE
IGHV3.30	HLA-A.E152E_T	1.40968	1.69109	0.0923847	0.999059	FALSE
IGHV7.4.1	HLA-DQB1.T77R_T	-0.061693	-1.69092	0.092418	0.999059	FALSE
IGHV7.4.1	HLA-DQB1.T77T_A	-0.061693	-1.69092	0.092418	0.999059	FALSE
IGHV4.28	HLA-B.Y9H_T	-0.00474233	-1.69076	0.0924487	0.999059	FALSE
IGHV3.15	HLA-DRB1.H16H_A	0.00985638	1.69049	0.0924993	0.999059	FALSE
IGHV3.d	HLA-DQB1.F9F_T	-0.0142131	-1.69035	0.0925259	0.999059	FALSE
IGHV1.46	HLA-DPB1.A55E_A	0.0359001	1.69031	0.0925343	0.999059	FALSE
IGHV1.18	HLA-DQB1.G70R_A	-0.0877619	-1.68977	0.0926384	0.999059	FALSE
IGHV3.21	HLA-A.F9S_T	0.302933	1.68862	0.0928589	0.999059	FALSE
IGHV4.30.4	HLA-C.S99F_T	0.00411029	1.68859	0.092865	0.999059	FALSE
IGHV3.NL1	HLA-C.T163T_A	0.289534	1.68842	0.0928963	0.999059	FALSE
IGHV4.28	HLA-DRB1.Y30H_T	0.0058362	1.68799	0.0929789	0.999059	FALSE
IGHV3.21	HLA-B.A41T_T	0.236047	1.6875	0.0930742	0.999059	FALSE
IGHV3.23	HLA-B.L95L_A	-0.371662	-1.68703	0.093165	0.999059	FALSE
IGHV1.69	HLA-A.E152E_T	-0.155431	-1.68694	0.0931822	0.999059	FALSE
IGHV3.7	HLA-B.C325C_T	0.160243	1.68622	0.0933208	0.999059	FALSE
IGHV1.45	HLA-DRB1.A73G_T	0.039086	1.68583	0.0933961	0.999059	FALSE
IGHV3.48	HLA-A.I142T_T	0.255899	1.6847	0.0936137	0.999059	FALSE
IGHV3.48	HLA-A.R145H_T	0.255899	1.6847	0.0936137	0.999059	FALSE
IGHV1.58	HLA-DPB1.M76I_T	0.0250913	1.68427	0.0936982	0.999059	FALSE
IGHV1.18	HLA-DPB1.F35L_A	0.0794911	1.68411	0.093729	0.999059	FALSE
IGHV3.15	HLA-A.A149T_T	-0.013936	-1.68363	0.0938207	0.999059	FALSE
IGHV1.24	HLA-C.A152A_T	-0.0321657	-1.68357	0.0938325	0.999059	FALSE
IGHV1.24	HLA-C.L147W_A	-0.0321657	-1.68357	0.0938325	0.999059	FALSE
IGHV1.24	HLA-C.L194V_A	-0.0321657	-1.68357	0.0938325	0.999059	FALSE
IGHV1.24	HLA-C.M261V_A	-0.0321657	-1.68357	0.0938325	0.999059	FALSE
IGHV1.24	HLA-C.P184H_A	-0.0321657	-1.68357	0.0938325	0.999059	FALSE
IGHV1.24	HLA-C.Q253E_A	-0.0321657	-1.68357	0.0938325	0.999059	FALSE
IGHV1.24	HLA-C.Q267P_A	-0.0321657	-1.68357	0.0938325	0.999059	FALSE
IGHV1.24	HLA-C.S273R_A	-0.0321657	-1.68357	0.0938325	0.999059	FALSE
IGHV3.23	HLA-B.Q70Q_T	-0.409032	-1.6827	0.0940011	0.999059	FALSE
IGHV4.61	HLA-A.D116Y_T	0.0298096	1.68218	0.0941017	0.999059	FALSE
IGHV4.61	HLA-A.I95I_A	0.0298096	1.68218	0.0941017	0.999059	FALSE
IGHV4.61	HLA-A.N66K_T	0.0298096	1.68218	0.0941017	0.999059	FALSE
IGHV4.61	HLA-A.R114H_T	0.0298096	1.68218	0.0941017	0.999059	FALSE
IGHV3.20	HLA-B.H113Y_T	0.0987702	1.68119	0.094295	0.999059	FALSE
IGHV3.20	HLA-C.R219W_A	0.0625976	1.68112	0.0943093	0.999059	FALSE
IGHV3.72	HLA-A.A90D_T	-0.00186788	-1.681	0.0943309	0.999059	FALSE
IGHV3.72	HLA-A.T163R_T	-0.00186788	-1.681	0.0943309	0.999059	FALSE
IGHV3.43	HLA-C.C1G_T	-0.217724	-1.68095	0.094341	0.999059	FALSE
IGHV1.46	HLA-DRB1.I67F_T	0.0383996	1.68004	0.094519	0.999059	FALSE
IGHV2.70	HLA-A.I97I_T	0.0365435	1.67971	0.0945825	0.999059	FALSE
IGHV2.70	HLA-A.L276P_A	0.0365435	1.67971	0.0945825	0.999059	FALSE
IGHV2.70	HLA-A.T321S_A	0.0365435	1.67971	0.0945825	0.999059	FALSE
IGHV2.26	HLA-C.L156L_A	0.0129162	1.6796	0.0946038	0.999059	FALSE
IGHV1.69	HLA-DQA1.E50L_T	-0.104302	-1.67956	0.0946115	0.999059	FALSE
IGHV1.69	HLA-DQA1.F215L_T	-0.104302	-1.67956	0.0946115	0.999059	FALSE
IGHV1.69	HLA-DQA1.K53R_T	-0.104302	-1.67956	0.0946115	0.999059	FALSE
IGHV3.15	HLA-DQB1.G125G_T	-0.00998868	-1.67898	0.0947248	0.999059	FALSE
IGHV7.4.1	HLA-DRB1.Q70Q_T	-0.0583665	-1.6786	0.094799	0.999059	FALSE
IGHV1.18	HLA-DRB1.K98E_T	0.0868151	1.67661	0.0951881	0.999059	FALSE
IGHV1.18	HLA-DRB1.S104A_T	0.0868151	1.67661	0.0951881	0.999059	FALSE
IGHV2.26	HLA-C.R219W_A	-0.0131825	-1.67629	0.0952512	0.999059	FALSE
IGHV4.30.2	HLA-DQB1.G13A_T	-0.0271808	-1.67628	0.0952536	0.999059	FALSE
IGHV4.30.2	HLA-DQB1.L26Y_T	-0.0271808	-1.67628	0.0952536	0.999059	FALSE
IGHV4.30.2	HLA-DQB1.R167H_T	-0.0271808	-1.67628	0.0952536	0.999059	FALSE
IGHV3.66	HLA-C.A11A_A	0.0857818	1.67583	0.095342	0.999059	FALSE
IGHV3.66	HLA-C.A11S_T	0.0857818	1.67583	0.095342	0.999059	FALSE
IGHV3.30	HLA-C.L156R_T	0.93297	1.67582	0.0953433	0.999059	FALSE
IGHV3.43	HLA-DQB1.D57D_A	0.210049	1.67538	0.0954307	0.999059	FALSE
IGHV3.11	HLA-DQB1.A38A_A	-0.240803	-1.67536	0.0954342	0.999059	FALSE
IGHV3.11	HLA-DQB1.A38V_T	-0.240803	-1.67536	0.0954342	0.999059	FALSE
IGHV1.24	HLA-DQB1.L26L_T	-0.0264455	-1.67533	0.0954399	0.999059	FALSE
IGHV4.b	HLA-DRB1.I67F_T	0.0101234	1.67511	0.0954824	0.999059	FALSE
IGHV7.4.1	HLA-B.A305T_A	-0.0535385	-1.67482	0.0955411	0.999059	FALSE
IGHV3.66	HLA-C.A152E_A	-0.0847871	-1.67464	0.0955758	0.999059	FALSE
IGHV3.23	HLA-C.E275E_A	0.458982	1.67174	0.0961466	0.999059	FALSE
IGHV3.64	HLA-B.C325S_A	0.111785	1.6715	0.0961939	0.999059	FALSE
IGHV6.1	HLA-DRB1.Y32H_T	0.0696455	1.6713	0.0962346	0.999059	FALSE
IGHV3.NL1	HLA-B.R131S_A	-0.286782	-1.67091	0.0963104	0.999059	FALSE
IGHV3.49	HLA-A.K144Q_T	0.00621923	1.67061	0.0963699	0.999059	FALSE
IGHV3.43	HLA-DQA1.E50L_T	0.206367	1.67008	0.0964749	0.999059	FALSE
IGHV3.43	HLA-DQA1.F215L_T	0.206367	1.67008	0.0964749	0.999059	FALSE
IGHV3.43	HLA-DQA1.K53R_T	0.206367	1.67008	0.0964749	0.999059	FALSE
IGHV3.30.3	HLA-C.E173K_T	0.308662	1.67007	0.0964781	0.999059	FALSE
IGHV3.30.3	HLA-C.L103V_T	0.308662	1.67007	0.0964781	0.999059	FALSE
IGHV3.30.3	HLA-C.T163L_T	0.308662	1.67007	0.0964781	0.999059	FALSE
IGHV3.30.3	HLA-C.S99S_T	-0.335656	-1.66994	0.096503	0.999059	FALSE
IGHV1.46	HLA-B.A305T_A	0.0359403	1.66972	0.0965463	0.999059	FALSE
IGHV3.23	HLA-C.E173K_T	-0.409526	-1.66912	0.0966661	0.999059	FALSE
IGHV3.23	HLA-C.L103V_T	-0.409526	-1.66912	0.0966661	0.999059	FALSE
IGHV3.23	HLA-C.T163L_T	-0.409526	-1.66912	0.0966661	0.999059	FALSE
IGHV1.69	HLA-DQA1.Q129H_A	0.106533	1.66823	0.0968427	0.999059	FALSE
IGHV7.4.1	HLA-B.V282I_A	-0.0528555	-1.66812	0.0968651	0.999059	FALSE
IGHV2.26	HLA-B.S97T_T	0.0166427	1.66755	0.0969786	0.999059	FALSE
IGHV1.46	HLA-DQA1.R41K_T	-0.0676422	-1.66729	0.0970304	0.999059	FALSE
IGHV1.46	HLA-DQA1.S130A_T	-0.0676422	-1.66729	0.0970304	0.999059	FALSE
IGHV3.15	HLA-A.L156L_T	0.0083787	1.66688	0.0971104	0.999059	FALSE
IGHV3.21	HLA-DPA1.K111R_A	-0.238108	-1.66646	0.0971958	0.999059	FALSE
IGHV3.21	HLA-DPA1.M31Q_A	-0.238108	-1.66646	0.0971958	0.999059	FALSE
IGHV3.74	HLA-DQB1.G70R_A	-0.152611	-1.66621	0.0972458	0.999059	FALSE
IGHV3.73	HLA-B.D114D_T	0.00760681	1.66611	0.097264	0.999059	FALSE
IGHV3.23	HLA-B.Y67Y_T	-0.399314	-1.66571	0.0973454	0.999059	FALSE
IGHV3.d	HLA-A.I298F_T	0.0132174	1.66544	0.0973985	0.999059	FALSE
IGHV3.d	HLA-A.M307R_T	0.0132174	1.66544	0.0973985	0.999059	FALSE
IGHV3.d	HLA-A.S-10L_T	0.0132174	1.66544	0.0973985	0.999059	FALSE
IGHV4.34	HLA-B.D177E_A	-0.0519411	-1.66473	0.0975398	0.999059	FALSE
IGHV4.34	HLA-B.E180Q_A	-0.0519411	-1.66473	0.0975398	0.999059	FALSE
IGHV3.72	HLA-A.A149T_T	-0.00299486	-1.66344	0.0977987	0.999059	FALSE
IGHV1.69	HLA-B.A69T_A	-0.104579	-1.66307	0.0978724	0.999059	FALSE
IGHV1.69	HLA-B.A71A_T	-0.104579	-1.66307	0.0978724	0.999059	FALSE
IGHV1.69	HLA-B.A71T_A	-0.104579	-1.66307	0.0978724	0.999059	FALSE
IGHV1.69	HLA-B.Q70N_A	-0.104579	-1.66307	0.0978724	0.999059	FALSE
IGHV4.b	HLA-B.D114D_T	0.00995953	1.66231	0.0980251	0.999059	FALSE
IGHV3.20	HLA-DQB1.A86E_A	-0.06291	-1.66213	0.0980608	0.999059	FALSE
IGHV3.20	HLA-DQB1.E84Q_A	-0.06291	-1.66213	0.0980608	0.999059	FALSE
IGHV3.20	HLA-DQB1.F87L_A	-0.06291	-1.66213	0.0980608	0.999059	FALSE
IGHV3.20	HLA-DQB1.G89T_A	-0.06291	-1.66213	0.0980608	0.999059	FALSE
[truncated: 21,424 more rows]
